# Supplementary material for: Do emotions related to alcohol consumption differ by alcohol type? An international cross-sectional survey of emotions associated with alcohol consumption and influence on drink choice in different settings
Source: PubMed Central journal article supplement — BMJ Open. 2017 Nov 20;7(10):e016089. doi: 10.1136/bmjopen-2017-016089 (PMC5701978; doi:10.1136/bmjopen-2017-016089), 2017-11-20
Supplement: bmjopen-2017-016089.draft_revisions.pdf [file bmjopen-2017-016089.draft_revisions.pdf]

# BMJ Open

BMJ Open is committed to open peer review. As part of this commitment we make the peer review history of every article we publish publicly available.

When an article is published we post the peer reviewers' comments and the authors' responses online. We also post the versions of the paper that were used during peer review. These are the versions that the peer review comments apply to.

The versions of the paper that follow are the versions that were submitted during the peer review process. They are not the versions of record or the final published versions. They should not be cited or distributed as the published version of this manuscript.

BMJ Open is an open access journal and the full, final, typeset and author-corrected version of record of the manuscript is available on our site with no access controls, subscription charges or pay-per-view fees (<http://bmjopen.bmj.com>).

If you have any questions on BMJ Open's open peer review process please email [editorial.bmjopen@bmj.com](mailto:editorial.bmjopen@bmj.com)

# BMJ Open

**Do emotions related to alcohol consumption differ by alcohol type? An international cross-sectional survey of emotions associated with alcohol consumption and influence on drink choice in different settings.**

|                                 |                                                                                                                                                                                                                                                                                                                                                                                                                                                                                         |
|---------------------------------|-----------------------------------------------------------------------------------------------------------------------------------------------------------------------------------------------------------------------------------------------------------------------------------------------------------------------------------------------------------------------------------------------------------------------------------------------------------------------------------------|
| Journal:                        | <i>BMJ Open</i>                                                                                                                                                                                                                                                                                                                                                                                                                                                                         |
| Manuscript ID                   | bmjopen-2017-016089                                                                                                                                                                                                                                                                                                                                                                                                                                                                     |
| Article Type:                   | Research                                                                                                                                                                                                                                                                                                                                                                                                                                                                                |
| Date Submitted by the Author:   | 25-Jan-2017                                                                                                                                                                                                                                                                                                                                                                                                                                                                             |
| Complete List of Authors:       | Ashton, Kathryn; Public Health Wales, Policy, Research and International Development<br>Bellis, Mark; Bangor University, College of Health and Behavioural Sciences; Public Health Wales, Policy, Research and International Development<br>Davies, Alisha; Public Health Wales, Policy, Research and International Development<br>Hughes, Karen; Public Health Wales, Policy, Research and International Development<br>Winstock, Adam; King's College London, Institute of Psychiatry |
| <b>Primary Subject Heading</b>: | Public health                                                                                                                                                                                                                                                                                                                                                                                                                                                                           |
| Secondary Subject Heading:      | Addiction                                                                                                                                                                                                                                                                                                                                                                                                                                                                               |
| Keywords:                       | Substance misuse < PSYCHIATRY, PUBLIC HEALTH, Depression & mood disorders < PSYCHIATRY                                                                                                                                                                                                                                                                                                                                                                                                  |
|                                 |                                                                                                                                                                                                                                                                                                                                                                                                                                                                                         |

SCHOLARONE™  
Manuscripts

1  
2  
3  
4  
5  
6  
7  
8  
9  
10 **Title:** Do emotions related to alcohol consumption differ by alcohol type? An international  
11 cross-sectional survey of emotions associated with alcohol consumption and influence on  
12 drink choice in different settings.  
13

14  
15  
16 **Authors:** Kathryn Ashton<sup>1</sup>, Mark A Bellis<sup>1</sup>, Alisha R Davies<sup>1</sup>, Karen Hughes<sup>1</sup> and Adam Winstock<sup>2</sup>  
17  
18

19  
20 <sup>1</sup>Public Health Wales NHS Trust, Floor 5 Capital Quarter 2, Tyndall Street, Cardiff, UK, CF10 4BZ.

21 <sup>2</sup> Institute of Psychiatry, Psychiatry and Neuroscience, King's College London, Addiction Sciences Building, 4  
22 Windsor Walk, Denmark Hill, London, UK, SE5 8BB.  
23

24  
25  
26 **Corresponding author:** Mrs Kathryn Ashton, [kathryn.ashton2@wales.nhs.uk](mailto:kathryn.ashton2@wales.nhs.uk), 02920 104460.  
27  
28

29  
30 **Word count:** 3387  
31  
32  
33  
34  
35  
36  
37  
38  
39  
40  
41  
42  
43  
44  
45  
46  
47  
48  
49  
50  
51  
52  
53  
54  
55  
56  
57  
58  
59  
60

## ABSTRACT

### Objectives

To examine the emotions associated with drinking different types of alcohol, explore whether these emotions differ by socio-demographics and alcohol dependency and whether the emotions associated with different drink types influence people's choice of drinks in different settings.

### Design

International cross-sectional opportunistic survey (Global Drug Survey) using an online anonymous questionnaire in 11 languages promoted through newspapers, magazines and social media from November 2015-January 2016.

### Study Population

Individuals aged 18-34 years who reported consumption of beer, spirits, red and white wine in the previous 12 months and were resident in countries with more than 250 respondents (n= 21 countries; 29,836 respondents).

### Main outcome measures

Positive and negative emotions associated with consumption of different alcoholic beverages (energised, relaxed, sexy and confident, tired, aggressive, ill, restless and tearful) over the past 12 months in different settings.

### Results

Alcoholic beverages vary in the types of emotions they elicit, with spirits more frequently eliciting emotional changes of all types. Overall 29.8% of respondents reported feeling aggressive when drinking spirits, compared to only 7.14% when drinking red wine ( $p < 0.001$ ). Women more frequently reported feeling all emotions when drinking alcohol, apart from feelings of aggression. Respondent's level of alcohol dependency alcohol was strongly associated with feeling all emotions, with the likelihood of aggression being significantly higher in possible dependent versus low risk drinkers (AOR 6.4; 95%CI 5.79-7.09;  $p < 0.001$ ). The odds of feeling the majority of positive and negative emotions also remained highest amongst dependent drinkers irrespective of setting.

### Conclusion

Understanding emotions associated with alcohol consumption is imperative to addressing alcohol misuse, providing insight into what emotions influence drink choice between different groups in the population. The differences identified between socio-demographic groups and influences on drink choice within different settings will aid future public health practice to further comprehend individual's drinking patterns and influence behaviour change.

**ARTICLE SUMMARY****Strengths and limitations of this study**

- The Global Drug Survey is a well-established international survey that allows analysis of both drug and alcohol use.
- Using on-line methods in multiple languages, the Global Drug Survey 2016 included unique questions on alcohol consumption and emotions related to consuming different types of alcohol.
- All respondents within the sample used for this study drank all types of alcohol included in the analysis.
- Although the sample size for the study is large, the sample is opportunistic and non-probability samples cannot be considered representative of more general population groups.
- Analysis makes the assumption that alcohol consumption behaviours are based on rational choice, which may not always be the case due to confounding factors such as the influence of alcohol on recollection.

**Funding statement**

This research received no specific grant from any funding agency in the public, commercial or not-for-profit sectors. The GDS is a independent self-funded survey.

**No competing interests**

We have read and understood BMJ policy on declaration of interests and declare that we have no competing interests.

**Ethics**

Ethical approval for the GDS 2016 was obtained from the Psychiatry, Nursing and Midwives Ethics Subcommittee at Kings College London.

**License statement**

The Corresponding Author has the right to grant on behalf of all authors and does grant on behalf of all authors, a worldwide licence to the Publishers and its licensees in perpetuity, in all forms, formats and media (whether known now or created in the future), to i) publish, reproduce, distribute, display and store the Contribution, ii) translate the Contribution into other languages, create adaptations, reprints, include within collections and create summaries, extracts and/or, abstracts of the Contribution, iii) create any other derivative work(s) based on the Contribution, iv) to exploit all subsidiary rights in the Contribution, v) the inclusion of electronic links from the Contribution to third party material where-ever it may be located; and, vi) licence any third party to do any or all of the above.

## INTRODUCTION

Alcohol use is of international public health concern with approximately 3.3 million deaths and 5.1% of the global burden of disease and injury attributable to alcohol consumption.[1] In addition, there is a growing body of evidence illustrating the harms caused by those who drink alcohol to individuals around them and to wider communities (e.g. through alcohol related violence and anti-social behaviour).[2-4] Understanding why people choose particular drink types and whether different drinks elicit different emotions may help inform more effective public health interventions.

Alcohol consumption has a long-standing association with mood, with evidence showing that people consume alcohol to help regulate emotional experiences, reduce negative emotions and enhance positive emotions.[5-6] A substantial body of research exists which outlines drinking motives, defined as the gateway to the decision to consume alcohol, and makes the assumption that people drink in order to achieve a particular goal.[7-9] Social motives have been associated with moderate alcohol use; enhancement motives (for example, increasing levels of confidence) with heavy drinking; and coping motives with alcohol-related problems.[7] Evidence also outlines how expectancies about the perceived consequences of drinking alcohol affects whether people start to drink, become regular drinkers or become dependent on alcohol.[10]

Historically, alcohol's perceived capacity to temporarily reduce negative emotions (and consequently increase pleasure and relaxation) has been regarded as the primary reason for consumption.[11] Individuals across the United States, Canada and Sweden have previously reported associating generally positive emotions with alcohol consumption, emphasising feelings of relaxation, and reporting alcohol as an antidote to fatigue and contributing to increasing the values of sociability.[12] Social mood enhancement has also been found to be the most highly endorsed reason for drinking, with alcohol consumption being strongly associated with short term increases in self-reported positive mood, decreases in negative mood and increases in levels of social bonding.[13] However, although alcohol may initially induce stimulation, consumption has also been associated with triggering negative emotions, such as aggression and depression[14-16] and can lead to out-of-character actions being undertaken by the drinker and exacerbate pre-morbid personality traits.[17]

Outside cultural myth and folklore, little attention has been paid to the immediate emotions associated with drinking different types of alcohol. Potential differences in the emotional consequences (both positive and negative) of drinking different types of alcohol (e.g. spirits vs. beer) and how emotional expectations from past experiences of different alcohol types influence drink choice remain relatively unexplored areas. However, measures that look to change drinking behaviour and consequently reduce alcohol related harms could benefit from a better understanding of how different drink types are associated with diverse social and emotional outcomes and how such relationships vary with demographics and drinking situation (for example, whether drinking at home or when out). In this study, we used the internationally established Global Drug Survey (GDS) to identify which drink types are associated with different emotional outcomes in alcohol consumers from 21 countries and how both demographic factors and levels of dependency on alcohol affect such relationships. Finally, we explored whether emotions that

respondents associate with different drink types influence their choices of drinks in different settings.

## METHODS

### Data source

The GDS is the world's biggest drug survey. Using encrypted on-line survey methods, the GDS is run as an annual, opportunistic, self-reported, cross sectional survey of alcohol and drug use amongst adults over the age of 16 years.[18] The GDS 2016 was launched online in November 2015 in 11 languages (English, German, Greek, Polish, French, Italian, Spanish, Portuguese, Flemish, Hungarian and Danish) and promoted internationally through national media (newspapers, magazines and social media networks). While the GDS non-probability methodology is not useful to support the assessment of general population prevalence, the GDS sample allows analysis of specific populations, including segmentation by age groups, gender, sexual preferences, place of residence, or mental health status. GDS can efficiently add nuance and add depth to the findings of more representative surveys, which are often less detailed and based on smaller samples. The GDS has previously been used to examine both alcohol and drug use, for example exploring the risk of emergency admission after drug use, trends in self-reported drug use such as nitrous oxide and examining harm to others from alcohol consumption.[4, 19-20] Whilst it was not designed to create supra-national or nationally representative population estimates it does provides access to a large sample of self-selected individuals. Other publications provide full details of other aspects of the utility, design and limitations of the GDS.[4, 19]

### Variables

Socio-demographic data were collected on age, sex, country of residence and educational attainment (here categorised into either not attended high school, or attended high school) as a proxy for socio-economic status. The GDS also collects data on the consumption of both legal and illegal drug use and alcohol use.[18] Analyses within this study focus on individual alcohol use and utilise a range of questions that asked respondents to self-report what type of alcoholic drink(s) they consume and which different emotions they associated with each alcohol type. Emotions included were both positive (energised, relaxed, sexy and confident) and negative (tired, aggressive, ill, restless and tearful). Data were also collected on what types of alcohol were most likely to be drunk at home or when out and levels of consumption for each participant using the Alcohol Use Disorders Test (AUDIT) were also calculated.[21]

### Study population

In total, 87,925 respondents completed the survey and had reported drinking alcohol in the last 12 months. However, in order to use a more defined dataset for analyses, the data used was restricted to respondents who had reported their sex, were resident in a country which contributed at least 250 responses to the overall survey and were aged 18-34 years old. In total, 4,271 cases were excluded due to low country response and 23,076 were excluded as they were out of the desired age range leaving a sample of 60,578. All respondents to the survey reported their gender. For the purposes of examining emotional relationships with different alcohol types only individuals who had

1  
2  
3 consumed all alcohol types of interest (i.e. spirits, red wine, white wine and beer) at some point in  
4 the last 12 months and had indicated one of these as their main drink when at home and when  
5 outside of the home were included. Although some respondents reported drinking other beverages,  
6 for example cider, the numbers were too small for inclusion in the analysis. This resulted in a final  
7 sample size of 29,836. Full details of sample demographics used in the analysis are outlined in  
8 Supplementary Table A.  
9

### 10 11 **Statistical methods**

12  
13 To identify and quantify the strength of association between variables used in the analysis, chi  
14 squared, Cochran's Q, McNemar's test and logistic regression modelling were undertaken in SPSS  
15 (V.23). Demographics included in analyses were age (categorised as 18-24, 25-29 and 30-34 years),  
16 sex, country of residence, basic educational attainment (whether respondents had attended at least  
17 a high school or secondary school education) and levels of dependency on alcohol. Based on the  
18 AUDIT questionnaire, for the purposes of analyses respondents were classified into the following  
19 dependency categories: 0-7, low risk; 8-15, increasing risk; 16-19, higher risk; 20+, possible  
20 dependence.[21] The emotions associated with drinking individual types of alcohol were analysed  
21 and the emotions individuals experience regardless of the drink they associated the emotion with  
22 were combined to create a set of variables which describe the emotions associated with drinking any  
23 of the different types of alcohol (spirits, white wine, red wine or spirits). In addition, to analyse how  
24 emotions related to drink choice in different settings, the responses to what drinks were reported to  
25 be mostly consumed in different settings and the emotions which people reported with those  
26 particular drink types were linked.  
27  
28  
29  
30

### 31 **RESULTS**

32  
33 Results indicated that drinking different types of alcohol elicited different emotions (Table 1). Over  
34 half of all respondents associated drinking spirits with emotions of energy and confidence and 42.4%  
35 reported that drinking spirits made them feel sexy. Respondents were most likely to report feeling  
36 relaxed (52.8%) when drinking red wine; although almost half of respondents also reported feeling  
37 relaxed when drinking beer (Table 1). Drinking spirits was more likely to draw out feelings of  
38 aggression, illness, restlessness and tearfulness than all other drink types (Table 1). However, red  
39 wine was the most likely to make individuals feel tired (60.1%, Table 1).  
40  
41  
42  
43  
44  
45  
46  
47  
48  
49  
50  
51  
52  
53  
54  
55  
56  
57  
58  
59  
60



1  
2  
3  
4  
5  
6  
7  
8  
9  
10  
11  
12  
13  
14  
15  
16  
17  
18  
19  
20  
21  
22  
23  
24  
25  
26  
27  
28  
29  
30  
31  
32  
33  
34  
35  
36  
37  
38  
39  
40  
41  
42  
43  
44  
45  
46  
47  
48  
49

Table 1: Overall reported emotions by individual type of alcoholic drink (%)

|                          |            | n     | Drink type |             |          |             |            |             |       |             | Cochran's |        |
|--------------------------|------------|-------|------------|-------------|----------|-------------|------------|-------------|-------|-------------|-----------|--------|
|                          |            |       | Spirits    | 95%CI       | Red wine | 95%CI       | White wine | 95%CI       | Beer  | 95%CI       | Q         | P      |
| <b>Positive emotions</b> | Energised  | 29836 | 58.36      | 57.80-58.92 | 7.14     | 6.84-7.43   | 15.07      | 14.66-15.47 | 24.76 | 24.27-25.24 | 23610.470 | <0.001 |
|                          | Confident  | 29836 | 59.08      | 58.52-59.63 | 27.88    | 27.37-28.39 | 28.27      | 27.76-28.78 | 44.54 | 43.97-45.10 | 11885.08  | <0.001 |
|                          | Relaxed    | 29836 | 20.15      | 19.70-20.61 | 52.80    | 52.23-53.37 | 32.67      | 32.14-33.20 | 49.87 | 49.30-50.43 | 9578.230  | <0.001 |
|                          | Sexy       | 29836 | 42.42      | 41.85-42.98 | 25.20    | 24.71-25.70 | 23.73      | 23.24-24.21 | 18.86 | 18.41-19.31 | 6261.860  | <0.001 |
| <b>Negative emotions</b> | Tired      | 29836 | 15.33      | 14.92-15.74 | 60.08    | 59.52-60.63 | 18.44      | 18.00-18.88 | 38.92 | 38.36-39.47 | 17024.29  | <0.001 |
|                          | Aggressive | 29836 | 29.83      | 29.31-30.35 | 2.57     | 2.39-2.75   | 2.74       | 2.55-2.92   | 6.73  | 6.44-7.01   | 17467.32  | <0.001 |
|                          | Ill        | 29836 | 47.82      | 47.26-48.39 | 19.29    | 18.84-19.74 | 14.50      | 14.10-14.90 | 16.71 | 16.28-17.13 | 13032.62  | <0.001 |
|                          | Restless   | 29836 | 27.81      | 27.30-28.32 | 5.18     | 4.93-5.43   | 6.43       | 6.15-6.71   | 9.34  | 9.01-9.67   | 11329.91  | <0.001 |
|                          | Tearful    | 29836 | 22.24      | 21.77-22.71 | 17.10    | 16.67-17.52 | 9.96       | 9.62-10.30  | 9.88  | 9.54-10.22  | 3551.28   | <0.001 |

Review only

### Emotional associations with drinking any type of alcohol (spirits, white wine, red wine and beer)

Overall, differences in emotions elicited by drinking any type of alcohol (here inclusive of spirits, white wine, red wine and beer) were examined for socio-demographic groups. With the exception of feeling aggressive, females were significantly more likely than males to report each emotion as a result of drinking any type of alcohol (Table 2). Younger age groups (18-24 years) most frequently reported the most emotion types when drinking alcohol. Exceptions were aggression and tiredness where there was no significant association with age (Table 2). Respondents' alcohol consumption (AUDIT score) was strongly associated with both positive and negative emotions, with heavier drinkers more likely to report all emotional changes as a result of drinking. This relationship was especially strong for the emotions of aggression (Table 2). A greater proportion of those with lower educational attainment reported both positive (energised, sexy or confident) and negative (aggressive, ill or tearful) emotions when drinking alcohol compared with those who had attended high school (Table 2). Bivariate associations between emotions and both alcohol dependence level and demographics remained significant after using logistic regression modelling to control for confounding relationships between variables (Table 3; online supplementary table B for country of residence). Thus, females had higher odds of feeling all emotions compared to males apart from aggression where males had significantly higher odds. Younger age groups had higher odds of feeling all emotions apart from tiredness and aggression. Odds of reporting all emotions increased with AUDIT score category, in particular feelings of aggression (Table 3). Differences in emotions were also reported by country with the highest association with the positive emotions of feeling energised, relaxed and sexy being the South American countries of Colombia and Brazil. For negative emotions, the country with the strongest association with aggression when drinking alcohol was Norway and feeling restless was France (online supplementary table B). However, caution must be taken when interpreting these results due to the limitations of the sample for each country, which is addressed in the limitations section of the discussion.

Table 2: Bivariate relationship between emotions associated with drinking any type of alcohol<sup>†</sup> and AUDIT score and socio-demographics (%)

|                             |                        | Emotions associated with drinking any type of alcohol <sup>†</sup> |                   |         |         |           |                   |            |         |          |          |
|-----------------------------|------------------------|--------------------------------------------------------------------|-------------------|---------|---------|-----------|-------------------|------------|---------|----------|----------|
|                             |                        | n                                                                  | Positive emotions |         |         |           | Negative emotions |            |         |          |          |
|                             |                        |                                                                    | Energised         | Relaxed | Sexy    | Confident | Tired             | Aggressive | Ill     | Restless | Tearful  |
| <b>AUDIT</b>                | Lower risk (0-7)       | 10577                                                              | 61.11             | 83.32   | 51.74   | 65.78     | 85.07             | 20.28      | 62.33   | 29.25    | 26.78    |
|                             | Increasing risk (8-15) | 14205                                                              | 79.25             | 90.55   | 65.91   | 80.76     | 87.83             | 38.24      | 72.22   | 39.63    | 39.87    |
|                             | Higher risk (16-19)    | 2895                                                               | 86.60             | 93.16   | 73.92   | 87.63     | 89.50             | 52.71      | 79.24   | 48.70    | 50.78    |
|                             | Dependence (20+)       | 2159                                                               | 90.13             | 93.61   | 73.83   | 89.95     | 88.42             | 63.08      | 80.64   | 55.16    | 59.70    |
|                             | $\chi^2$               |                                                                    | 1659.410          | 452.744 | 868.464 | 1244.958  | 63.389            | 2218.420   | 563.548 | 770.746  | 1220.481 |
|                             | p                      |                                                                    | ***               | ***     | ***     | ***       | ***               | ***        | ***     | ***      | ***      |
| <b>Sex</b>                  | Male                   | 19934                                                              | 73.01             | 88.06   | 57.17   | 75.88     | 85.45             | 36.97      | 67.45   | 36.98    | 32.27    |
|                             | Female                 | 9902                                                               | 76.96             | 89.28   | 72.43   | 78.61     | 90.29             | 31.27      | 75.16   | 39.92    | 48.71    |
|                             | $\chi^2$               |                                                                    | 54.179            | 9.635   | 655.165 | 27.760    | 137.980           | 94.407     | 187.240 | 24.269   | 761.188  |
|                             | p                      |                                                                    | ***               | **      | ***     | ***       | ***               | ***        | ***     | ***      | ***      |
| <b>Age (years)</b>          | 18-24                  | 16333                                                              | 79.30             | 89.19   | 67.03   | 81.36     | 86.97             | 35.39      | 72.32   | 40.06    | 40.38    |
|                             | 25-29                  | 8744                                                               | 70.53             | 87.98   | 59.00   | 73.28     | 87.64             | 35.16      | 68.57   | 36.76    | 35.94    |
|                             | 30-34                  | 4759                                                               | 64.22             | 86.85   | 51.73   | 67.49     | 86.28             | 33.83      | 64.70   | 32.95    | 31.88    |
|                             | $\chi^2$               |                                                                    | 532.72            | 22.585  | 422.007 | 482.601   | 5.278             | 3.993      | 114.045 | 86.724   | 130.036  |
|                             | p                      |                                                                    | ***               | ***     | ***     | ***       | NS                | NS         | ***     | ***      | ***      |
| <b>Attended high school</b> | Yes                    | 29365                                                              | 74.17             | 88.42   | 62.13   | 76.64     | 87.05             | 34.95      | 69.85   | 37.91    | 37.61    |
|                             | No                     | 471                                                                | 84.08             | 91.08   | 68.79   | 85.99     | 87.26             | 43.10      | 79.62   | 41.19    | 45.01    |
|                             | $\chi^2$               |                                                                    | 23.855            | 3.224   | 8.743   | 22.742    | 0.0180            | 13.5330    | 21.0560 | 2.1220   | 10.8190  |
|                             | p                      |                                                                    | ***               | NS      | **      | ***       | NS                | ***        | ***     | NS       | ***      |

AUDIT, alcohol use disorders identification test; NS, not significant.

\*p<0.05, \*\*p<0.01, \*\*\*p<0.001.

<sup>†</sup>Emotions from drinking respondents reported regardless of the type of alcohol they associate it with. Includes emotions associated with drinking spirits, white wine, red wine and beer.

Table 3: Logistic regression model<sup>†</sup> for AUDIT score and socio-demographic relationships with emotions associated with drinking any type of alcohol<sup>†</sup>

|                             |                               |       | Emotions associated with drinking any type of alcohol <sup>†</sup> |     |             |     |             |     |             |     |
|-----------------------------|-------------------------------|-------|--------------------------------------------------------------------|-----|-------------|-----|-------------|-----|-------------|-----|
|                             |                               |       | Positive emotions                                                  |     |             |     |             |     |             |     |
|                             |                               |       | Energised                                                          |     | Relaxed     |     | Sexy        |     | Confident   |     |
| n                           |                               |       | AOR                                                                | p   | AOR         | p   | AOR         | p   | AOR         | p   |
|                             |                               |       | (95% CI)                                                           |     | (95% CI)    |     | (95% CI)    |     | (95% CI)    |     |
| <b>AUDIT</b>                | Lower risk (0-7) <sup>‡</sup> | 10577 |                                                                    |     |             |     |             |     |             |     |
|                             | Increasing risk (8-15)        | 14205 | 2.28                                                               | *** | 1.864       | *** | 1.830       | *** | 2.034       | *** |
|                             |                               |       | (2.15-2.42)                                                        |     | (1.73-2.02) |     | (1.73-1.93) |     | (1.92-2.16) |     |
|                             | Higher risk (16-19)           | 2895  | 3.508                                                              | *** | 2.552       | *** | 2.640       | *** | 3.180       | *** |
|                             |                               |       | (3.12-3.94)                                                        |     | (2.19-2.98) |     | (2.40-2.90) |     | (2.82-3.59) |     |
|                             | Dependence (20+)              | 2159  | 4.733                                                              | *** | 2.657       | *** | 2.581       | *** | 3.860       | *** |
|                             |                               |       | (4.07-5.50)                                                        |     | (2.21-3.19) |     | (2.32-2.87) |     | (3.33-4.48) |     |
| <b>Sex</b>                  | Female <sup>‡</sup>           | 9902  |                                                                    |     |             |     |             |     |             |     |
|                             | Male                          | 19934 | 0.731                                                              | *** | 0.861       | *** | 0.475       | *** | 0.816       | *** |
|                             |                               |       | (0.69-0.78)                                                        |     | (0.80-0.93) |     | (0.45-0.50) |     | (0.77-0.87) |     |
| <b>Age (years)</b>          | 18-24 <sup>‡</sup>            | 16333 |                                                                    |     |             |     |             |     |             |     |
|                             | 25-29                         | 8744  | 0.696                                                              | *** | 0.961       | NS  | 0.774       | *** | 0.692       | *** |
|                             |                               |       | (0.65-0.74)                                                        |     | (0.88-1.04) |     | (0.73-0.82) |     | (0.65-0.74) |     |
|                             | 30-34                         | 4759  | 0.522                                                              | *** | 0.900       | *   | 0.611       | *** | 0.529       | *** |
|                             |                               |       | (0.48-0.56)                                                        |     | (0.81-1.00) |     | (0.57-0.65) |     | (0.49-0.57) |     |
| <b>Attended high school</b> | No <sup>‡</sup>               | 471   |                                                                    |     |             |     |             |     |             |     |
|                             | Yes                           | 29365 | 0.856                                                              | NS  | 1.080       | NS  | 0.972       | NS  | 0.783       | NS  |
|                             |                               |       | (0.66-1.11)                                                        |     | (0.78-1.50) |     | (0.79-1.20) |     | (0.60-1.03) |     |

|                             |                               | Negative emotions |   |             |     |             |     |             |     |             |     |             |     |
|-----------------------------|-------------------------------|-------------------|---|-------------|-----|-------------|-----|-------------|-----|-------------|-----|-------------|-----|
|                             |                               | Tired             |   | Aggressive  |     | Ill         |     | Restless    |     | Tearful     |     |             |     |
|                             |                               | AOR               | p | AOR         | p   | AOR         | p   | AOR         | p   | AOR         | p   |             |     |
|                             |                               | (95% CI)          |   | (95% CI)    |     | (95% CI)    |     | (95% CI)    |     | (95% CI)    |     |             |     |
| <b>AUDIT</b>                | Lower risk (0-7) <sup>‡</sup> | 10577             |   | 1.347       | *** | 2.403       | *** | 1.403       | *** | 1.549       | *** | 1.897       | *** |
|                             | Increasing risk (8-15)        | 14205             |   | (1.25-1.45) |     | (2.27-2.55) |     | (1.33-1.49) |     | (1.47-1.64) |     | (1.79-2.01) |     |
|                             |                               |                   |   | 1.636       | *** | 4.262       | *** | 1.827       | *** | 2.18        | *** | 2.955       | *** |
|                             | Higher risk (16-19)           | 2895              |   | (1.43-1.87) |     | (3.90-4.66) |     | (1.65-2.03) |     | (2.00-2.38) |     | (2.71-3.23) |     |
|                             | Dependence (20+)              | 2159              |   | 1.486       | *** | 6.407       | *** | 1.823       | *** | 2.811       | *** | 4.249       | *** |
|                             |                               |                   |   | (1.28-1.72) |     | (5.79-7.09) |     | (1.35-2.03) |     | (2.55-3.10) |     | (3.84-4.70) |     |
| <b>Sex</b>                  | Female <sup>‡</sup>           | 9902              |   | 0.626       | *** | 1.178       | *** | 0.659       | *** | 0.839       | *** | 0.451       | *** |
|                             | Male                          | 19934             |   | (0.58-0.68) |     | (1.12-1.24) |     | (0.62-0.70) |     | (0.80-0.88) |     | (0.43-0.48) |     |
| <b>Age (years)</b>          | 18-24 <sup>‡</sup>            | 16333             |   | 1.095       | *   | 1.106       | *** | 0.962       | *** | 0.920       | **  | 0.9         | *** |
|                             | 25-29                         | 8744              |   | (1.01-1.19) |     | (1.04-1.17) |     | (0.91-1.02) |     | (0.87-0.97) |     | (0.85-0.95) |     |
|                             |                               |                   |   | 1.037       | NS  | 1.089       | *** | 0.795       | *** | 0.793       | *** | 0.816       | *** |
|                             | 30-34                         | 4759              |   | (0.94-1.14) |     | (1.01-1.17) |     | (0.74-0.86) |     | (0.74-0.85) |     | (0.76-0.88) |     |
| <b>Attended high school</b> | No <sup>‡</sup>               | 471               |   | 1.119       | NS  | 0.906       | NS  | 0.861       | NS  | 1.054       | NS  | 0.829       | NS  |
|                             | Yes                           | 29365             |   | (0.85-1.48) |     | (0.74-1.10) |     | (0.68-1.10) |     | (0.87-1.28) |     | (0.68-1.01) |     |

AUDIT, alcohol use disorders identification test; AOR, adjusted odds ratio; CI, confidence interval; NS, not significant.

\*p<0.05, \*\*p<0.01, \*\*\*p<0.001.

<sup>¶</sup>Country of residence was also included in the logistic regression model. See online Supplementary Table B.

<sup>†</sup>Emotions from drinking respondents reported regardless of the type of alcohol they associate it with. Includes emotions associated with drinking spirits, white wine, red wine and beer.

<sup>‡</sup>reference category.

### Emotional associations by individual drink type

1  
2 For each individual drink type, positive emotions were more frequently reported by those with higher alcohol  
3 dependency scores. This was also true of negative emotions, with the exception of feeling tired when drinking spirits  
4 or red wine. Females were more likely to report each emotion when drinking spirits, red wine and white wine, with  
5 the exceptions of feeling relaxed, tired or aggressive with spirits, and energised with red wine. Males were more  
6 likely to report each emotion when drinking beer, apart from feeling tearful (Table 4).  
7  
8

9 Emotions reported with each alcohol type varied by age group. For example, feeling tired or relaxed when drinking  
10 spirits and red wine were more frequently reported by the youngest age group, whereas for white wine and beer  
11 these emotions were more frequently reported by the oldest age group. In addition, emotions associated with each  
12 drink type were more frequently reported by respondents who had not attended high school or higher education,  
13 with the exception of feeling sexy, ill or restless when drinking spirits, relaxed or tired when drinking red wine and  
14 energised or relaxed when drinking beer. Italian residents more frequently reported feeling energised whilst drinking  
15 red wine and those from Colombia were more likely to report feeling energised when drinking spirits (Online  
16 supplementary tables C and D).  
17  
18  
19  
20  
21  
22  
23  
24  
25  
26  
27  
28  
29  
30  
31  
32  
33  
34  
35  
36  
37  
38  
39  
40  
41  
42  
43  
44  
45  
46  
47  
48  
49  
50  
51  
52  
53  
54  
55  
56  
57  
58  
59  
60

**Table 4: Logistic regression models<sup>†</sup> for AUDIT score and socio-demographic relationships with emotions associated with drinking an individual type of alcohol**

|                          |                        | Positive emotions |     |                 |     |                 |     |                 |     | Negative emotions |     |                 |     |                 |     |                 |     |                 |     |
|--------------------------|------------------------|-------------------|-----|-----------------|-----|-----------------|-----|-----------------|-----|-------------------|-----|-----------------|-----|-----------------|-----|-----------------|-----|-----------------|-----|
|                          |                        | Energised         |     | Relaxed         |     | Sexy            |     | Confident       |     | Tired             |     | Aggressive      |     | Ill             |     | Restless        |     | Tearful         |     |
|                          |                        | AOR               | p   | AOR             | p   | AOR             | p   | AOR             | p   | AOR               | p   | AOR             | p   | AOR             | p   | AOR             | p   | AOR             | p   |
|                          |                        | (95% CI)          |     | (95% CI)        |     | (95% CI)        |     | (95% CI)        |     | (95% CI)          |     | (95% CI)        |     | (95% CI)        |     | (95% CI)        |     | (95% CI)        |     |
| <b>Spirits</b>           |                        |                   |     |                 |     |                 |     |                 |     |                   |     |                 |     |                 |     |                 |     |                 |     |
| <b>AUDIT<sup>†</sup></b> | Increasing risk (8-15) | 1.879             | *** | 0.916           | **  | 1.601           | *** | 1.633           | *** | 0.762             | *** | 2.419           | *** | 1.197           | *** | 1.552           | *** | 1.674           | *** |
|                          |                        | (1.78-<br>.198)   |     | (0.86-<br>0.98) |     | (1.52-<br>1.69) |     | (1.55-<br>1.72) |     | (0.71-<br>0.82)   |     | (2.27-<br>2.58) |     | (1.14-<br>1.26) |     | (1.46-<br>1.65) |     | (1.56-<br>1.79) |     |
|                          | Higher risk (16-19)    | 2.467             | *** | 0.952           | NS  | 2.102           | *** | 2.281           | *** | 0.798             | *** | 4.171           | *** | 1.347           | *** | 1.961           | *** | 2.402           | *** |
|                          |                        | (2.25-<br>2.71)   |     | (0.86-<br>1.06) |     | (1.93-<br>2.29) |     | (2.08-<br>2.50) |     | (0.71-<br>0.90)   |     | (3.81-<br>4.57) |     | (1.24-<br>1.47) |     | (1.79-<br>2.15) |     | (2.18-<br>2.65) |     |
|                          | Dependence (20+)       | 3.022             | *** | 1.043           | NS  | 2.211           | *** | 2.507           | *** | 0.707             | *** | 6.018           | *** | 1.293           | *** | 2.652           | *** | 3.279           | *** |
|                          |                        | (2.71-<br>3.37)   |     | (0.93-<br>1.06) |     | (2.01-<br>2.44) |     | (2.25-<br>2.79) |     | (0.62-<br>0.81)   |     | (5.44-<br>6.66) |     | (1.18-<br>1.42) |     | (2.40-<br>2.93) |     | (2.95-<br>3.65) |     |
| <b>Sex<sup>‡</sup></b>   | Male                   | 0.771             | *** | 1.185           | *** | 0.638           | *** | 0.888           | *** | 1.416             | *** | 1.159           | *** | 0.845           | *** | 0.823           | *** | 0.531           | *** |
|                          |                        | (0.73-<br>0.81)   |     | (1.11-<br>1.26) |     | (0.61-<br>0.67) |     | (0.84-<br>0.94) |     | (1.32-<br>1.52)   |     | (1.10-<br>1.23) |     | (0.80-<br>0.89) |     | (0.78-<br>0.87) |     | (0.50-<br>0.56) |     |
| <b>Red wine</b>          |                        |                   |     |                 |     |                 |     |                 |     |                   |     |                 |     |                 |     |                 |     |                 |     |
| <b>AUDIT<sup>†</sup></b> | Increasing risk (8-15) | 1.230             | *** | 1.185           | *** | 1.305           | *** | 1.280           | *** | 1.186             | *** | 1.568           | *** | 1.312           | *** | 1.181           | **  | 1.815           | *** |
|                          |                        | (1.11-<br>1.37)   |     | (1.13-<br>1.25) |     | (1.23-<br>1.39) |     | (1.21-<br>1.36) |     | (1.12-<br>1.25)   |     | (1.29-<br>1.90) |     | (1.22-<br>1.41) |     | (1.04-<br>1.34) |     | (1.68-<br>1.96) |     |
|                          | Higher risk (16-19)    | 1.405             | *** | 1.202           | *** | 1.526           | *** | 1.446           | *** | 1.312             | *** | 2.682           | *** | 1.722           | *** | 1.740           | *** | 2.636           | *** |
|                          |                        | (1.20-<br>1.65)   |     | (1.13-<br>1.25) |     | (1.39-<br>1.68) |     | (1.32-<br>1.59) |     | (1.20-<br>1.43)   |     | (2.11-<br>3.42) |     | (1.56-<br>1.91) |     | (1.46-<br>2.07) |     | (2.37-<br>2.94) |     |
|                          | Dependence (20+)       | 1.818             | *** | 1.194           | *** | 1.456           | *** | 1.618           | *** | 1.257             | *** | 3.701           | *** | 1.804           | *** | 2.075           | *** | 3.288           | *** |
|                          |                        | (1.55-<br>2.14)   |     | (1.09-<br>1.32) |     | (1.31-<br>1.62) |     | (1.46-<br>1.79) |     | (1.14-<br>1.39)   |     | (2.91-<br>4.71) |     | (1.61-<br>2.02) |     | (1.73-<br>2.49) |     | (2.93-<br>3.69) |     |
| <b>Sex<sup>‡</sup></b>   | Male                   | 1.157             | **  | 0.762           | *** | 0.604           | *** | 0.770           | *** | 0.543             | *** | 0.805           | **  | 0.776           | *** | 0.895           | *   | 0.453           | *** |

|                          |                        | (1.05-<br>1.28)          | (0.72-<br>0.80) | (0.57-<br>0.86)          | (0.73-<br>0.81) | (0.52-<br>0.57)          | (0.69-<br>0.94) | (0.73-<br>0.83)          | (0.80-<br>0.10) | (0.43-<br>0.48)          |     |                          |     |                          |     |                          |     |                          |     |
|--------------------------|------------------------|--------------------------|-----------------|--------------------------|-----------------|--------------------------|-----------------|--------------------------|-----------------|--------------------------|-----|--------------------------|-----|--------------------------|-----|--------------------------|-----|--------------------------|-----|
| <b>White wine</b>        |                        |                          |                 |                          |                 |                          |                 |                          |                 |                          |     |                          |     |                          |     |                          |     |                          |     |
| <b>AUDIT<sup>†</sup></b> | Increasing risk (8-15) | 1.566<br>(1.45-<br>1.69) | ***             | 1.438<br>(1.35-<br>1.53) | ***             | 1.038<br>(0.98-<br>1.10) | NS              | 1.465<br>(1.38-<br>1.56) | ***             | 0.857<br>(0.80-<br>0.92) | *** | 2.175<br>(1.79-<br>2.64) | *** | 1.381<br>(1.27-<br>1.50) | *** | 1.377<br>(1.23-<br>1.54) | *** | 1.681<br>(1.52-<br>1.85) | *** |
|                          | Higher risk (16-19)    | 1.922<br>(1.71-<br>2.16) | ***             | 1.754<br>(1.59-<br>1.94) | ***             | 1.100<br>(1.01-<br>1.20) | *               | 1.690<br>(1.54-<br>1.85) | ***             | 0.937<br>(0.84-<br>1.04) | NS  | 3.53<br>(2.76-<br>4.52)  | *** | 1.710<br>(1.52-<br>1.92) | *** | 2.127<br>(0.82-<br>2.49) | *** | 2.543<br>(2.22-<br>2.91) | *** |
|                          | Dependence (20+)       | 2.224<br>(1.96-<br>2.52) | ***             | 1.78<br>(1.60-<br>1.99)  | ***             | 1.066<br>(0.96-<br>1.18) | NS              | 1.801<br>(1.63-<br>2.00) | ***             | 0.854<br>(0.76-<br>0.97) | *   | 5.469<br>(4.28-<br>6.99) | *** | 1.990<br>(1.76-<br>2.25) | *** | 2.551<br>(2.16-<br>3.01) | *** | 3.391<br>(2.95-<br>3.90) | *** |
| <b>Sex<sup>‡</sup></b>   | Male                   | 0.561<br>(0.53-<br>1.60) | ***             | 0.411<br>(0.39-<br>0.44) | ***             | 0.568<br>(0.54-<br>0.60) | ***             | 0.528<br>(0.50-<br>0.56) | ***             | 0.714<br>(0.67-<br>0.76) | *** | 0.756<br>(0.65-<br>0.88) | *** | 0.734<br>(0.69-<br>0.79) | *** | 0.786<br>(0.71-<br>0.87) | *** | 0.356<br>(0.33-<br>0.39) | *** |
| <b>Beer</b>              |                        |                          |                 |                          |                 |                          |                 |                          |                 |                          |     |                          |     |                          |     |                          |     |                          |     |
| <b>AUDIT<sup>†</sup></b> | Increasing risk (8-15) | 1.575<br>(0.15-<br>1.68) | ***             | 1.360<br>(1.29-<br>1.43) | ***             | 1.551<br>(1.45-<br>1.66) | ***             | 1.577<br>(1.50-<br>1.66) | ***             | 1.024<br>(0.97-<br>1.08) | NS  | 1.697<br>(1.51-<br>1.91) | *** | 1.060<br>(0.97-<br>1.12) | NS  | 1.372<br>(1.25-<br>1.51) | *** | 1.625<br>(1.48-<br>1.79) | *** |
|                          | Higher risk (16-19)    | 1.943<br>(1.77-<br>2.14) | ***             | 1.496<br>(1.37-<br>1.63) | ***             | 1.981<br>(1.79-<br>2.20) | ***             | 1.975<br>(1.81-<br>2.15) | ***             | 1.092<br>(1.00-<br>1.19) | *   | 2.563<br>(2.19-<br>3.00) | *** | 1.092<br>(0.98-<br>1.22) | NS  | 1.772<br>(1.55-<br>2.03) | *** | 2.321<br>(1.03-<br>2.65) | *** |
|                          | Dependence (20+)       | 2.139<br>(1.93-<br>2.38) | ***             | 1.627<br>(1.48-<br>1.79) | ***             | 1.937<br>(1.72-<br>2.18) | ***             | 1.964<br>(1.78-<br>2.16) | ***             | 1.105<br>(1.00-<br>1.22) | *   | 3.281<br>(2.79-<br>3.86) | *** | 1.078<br>(0.95-<br>1.22) | NS  | 2.409<br>(2.09-<br>2.77) | *** | 3.002<br>(1.61-<br>3.45) | *** |
| <b>Sex<sup>‡</sup></b>   | Male                   | 1.246<br>(1.18-<br>1.32) | ***             | 1.773<br>(1.69-<br>1.86) | ***             | 1.410<br>(1.32-<br>1.51) | ***             | 1.552<br>(1.48-<br>1.63) | ***             | 1.461<br>(1.39-<br>1.54) | *** | 1.592<br>(1.43-<br>1.77) | *** | 0.671<br>(0.63-<br>0.72) | *** | 1.013<br>(0.93-<br>1.10) | NS  | 0.988<br>(0.91-<br>1.07) | NS  |

AUDIT, alcohol use disorders identification test; AOR, adjusted odds ratio; CI, confidence interval; NS, not significant.

\*p<0.05, \*\*p<0.01, \*\*\*p<0.001.

<sup>†</sup>Country of residence, age and educational attainment was also included in the logistic regression model. See online Supplementary Table D.

<sup>†</sup>Reference category is lower risk (0-7).

<sup>‡</sup>Reference category is female.



**Emotional associations with any type of alcohol by choice of drink in different settings**

1  
2 Finally, how the different emotions associated with drink type influence people's choices of alcoholic beverages in  
3 different settings was examined, taking into account confounding demographic factors (Table 5a and 5b; online  
4 supplementary table E). For each type of emotion, significant differences were reported between emotions elicited  
5 by the types of drinks which were mostly drunk at home compared to on a night out (Table 5a). Reporting a  
6 dependency on alcohol showed a strong association with drinking any type of alcohol which made them feel  
7 energised, sexy and confident whether drinking at home or when out. In addition, respondents dependent on  
8 alcohol reported a greater tendency to select any type of drink that elicited emotions of aggression and tearfulness  
9 when drinking at home or when out. The association between emotions of aggression and dependency was  
10 noticeably strongest, independent of setting. Females more frequently reported drinking types of alcohol at home  
11 and when out which elicit the emotion of feeling sexy compared to men (Table 5b).

12  
13  
14  
15 The youngest age group indicated a very strong relationship with choosing any type of alcohol that made them feel  
16 energised, sexy and confident when drinking outside of the home. However, these relationships were not as strong  
17 when drinking at home. The oldest age group more frequently chose to drink alcohol that made them feel tired and  
18 relaxed when out and the youngest age groups selecting drinks that made them feel tired when drinking at home  
19 (online supplementary table E).  
20  
21  
22  
23  
24  
25  
26  
27  
28  
29  
30  
31  
32  
33  
34  
35  
36  
37  
38  
39  
40  
41  
42  
43  
44  
45  
46  
47  
48  
49  
50  
51  
52  
53  
54  
55  
56  
57  
58  
59  
60

**Table 5a: Bivariate association<sup>¶</sup> for emotions associated with drinking any type of alcohol<sup>‡</sup> by setting, AUDIT score and socio-demographic relationships**

|                          |                                                 |                   |                 | n <sup>¥</sup> | % <sup>¥</sup> | $\chi^2$ (p)   |
|--------------------------|-------------------------------------------------|-------------------|-----------------|----------------|----------------|----------------|
| <b>Positive emotions</b> | <b>Mostly drank a drink which made you feel</b> | <b>Energised</b>  | <b>At home</b>  | 8008           | 26.84          |                |
|                          |                                                 |                   | <b>When out</b> | 13259          | 44.44          | 3683.349 (***) |
|                          |                                                 | <b>Relaxed</b>    | <b>At home</b>  | 19271          | 64.59          |                |
|                          |                                                 |                   | <b>When out</b> | 13929          | 46.69          | 3428.640 (***) |
|                          |                                                 | <b>Sexy</b>       | <b>At home</b>  | 9244           | 30.98          |                |
|                          |                                                 |                   | <b>When out</b> | 10458          | 35.05          | 257.954 (***)  |
| <b>Confident</b>         | <b>At home</b>                                  | 14613             | 48.98           |                |                |                |
|                          | <b>When out</b>                                 | 17673             | 59.23           | 1642.240 (***) |                |                |
| <b>Negative emotions</b> | <b>Mostly drank a drink which made you feel</b> | <b>Tired</b>      | <b>At home</b>  | 12535          | 42.01          |                |
|                          |                                                 |                   | <b>When out</b> | 8394           | 28.13          | 2204.450 (***) |
|                          |                                                 | <b>Aggressive</b> | <b>At home</b>  | 1888           | 6.33           |                |
|                          |                                                 |                   | <b>When out</b> | 4087           | 13.7           | 1646.066 (***) |
|                          |                                                 | <b>Ill</b>        | <b>At home</b>  | 3653           | 12.24          |                |
|                          |                                                 |                   | <b>When out</b> | 6077           | 20.37          | 135.873 (***)  |
|                          |                                                 | <b>Restless</b>   | <b>At home</b>  | 2589           | 8.68           |                |
|                          |                                                 |                   | <b>When out</b> | 4583           | 15.36          | 1336.490 (***) |
| <b>Tearful</b>           | <b>At home</b>                                  | 4367              | 14.64           |                |                |                |
|                          | <b>When out</b>                                 | 4573              | 15.33           | 13.636 (***)   |                |                |

AUDIT, alcohol use disorders identification test; AOR, adjusted odds ratios; CI, confidence intervals; NS, non significant.

\*p<0.05, \*\*p<0.01, \*\*\*p<0.001.

<sup>¶</sup>McNemar test (x2)

<sup>‡</sup>Emotions from drinking respondents reported regardless of the type of alcohol they associate it with. Includes emotions associated with drinking spirits, white wine, red wine and beer.

<sup>¥</sup>Refers to the number and percentage of respondents out of the whole sample (n=29836) who stated that they mostly drank a type of drink which makes them feel particular emotions in different settings.

**Table 5b: Logistic regression model† for emotions associated with drinking any type of alcohol‡ by setting‡, AUDIT score and socio-demographic relationships**

|                          |                               | At home           |     | When out          |     | At home           |     | When out          |     | At home           |     | When out          |     | At home           |     | When out          |     |
|--------------------------|-------------------------------|-------------------|-----|-------------------|-----|-------------------|-----|-------------------|-----|-------------------|-----|-------------------|-----|-------------------|-----|-------------------|-----|
|                          |                               | AOR               | p   |
|                          |                               | (95%CI)           |     | (95%CI)           |     | (95%CI)           |     | (95%CI)           |     | (95%CI)           |     | (95%CI)           |     | (95%CI)           |     | (95%CI)           |     |
| <b>Positive emotions</b> |                               | <b>Energised</b>  |     | <b>Relaxed</b>    |     | <b>Sexy</b>       |     | <b>Confident</b>  |     |                   |     |                   |     |                   |     |                   |     |
| <b>AUDIT</b>             | Lower risk (0-7) <sup>€</sup> |                   |     |                   |     |                   |     |                   |     |                   |     |                   |     |                   |     |                   |     |
|                          | Increasing risk (18-15)       | 1.563 (1.47-1.66) | *** | 1.654 (1.57-1.75) | *** | 1.202 (1.14-1.27) | *** | 1.136 (1.08-1.20) | *** | 1.454 (1.37-1.54) | *** | 1.515 (1.43-1.60) | *** | 1.563 (1.48-1.65) | *** | 1.662 (1.58-1.75) | *** |
|                          | Higher risk (16-19)           | 2.081 (1.90-2.28) | *** | 2.253 (2.07-2.46) | *** | 1.344 (1.23-1.47) | *** | 1.172 (1.08-1.28) | *** | 1.817 (1.66-1.99) | *** | 1.983 (1.82-2.17) | *** | 2.057 (1.89-2.24) | *** | 2.342 (2.14-2.57) | *** |
|                          | Dependence (20+)              | 2.607 (2.36-2.88) | *** | 2.594 (2.35-2.86) | *** | 1.320 (1.19-1.46) | *** | 1.178 (1.07-1.30) | *** | 1.956 (1.77-2.16) | *** | 2.075 (1.88-2.29) | *** | 2.148 (1.95-2.37) | *** | 2.305 (2.08-2.56) | *** |
| <b>Sex</b>               | Female <sup>€</sup>           |                   |     |                   |     |                   |     |                   |     |                   |     |                   |     |                   |     |                   |     |
|                          | Male                          | 1.091 (1.03-1.15) | **  | 0.760 (0.72-0.80) | *** | 0.906 (0.86-0.95) | *** | 1.338 (1.27-1.41) | *** | 0.542 (0.51-0.57) | *** | 0.644 (0.61-0.68) | *** | 0.992 (0.94-1.04) | NS  | 0.932 (0.86-0.98) | **  |
| <b>Negative emotions</b> |                               | <b>Tired</b>      |     | <b>Aggressive</b> |     | <b>Ill</b>        |     | <b>Tearful</b>    |     |                   |     |                   |     |                   |     |                   |     |
| <b>AUDIT</b>             | Lower risk (0-7) <sup>€</sup> |                   |     |                   |     |                   |     |                   |     |                   |     |                   |     |                   |     |                   |     |
|                          | Increasing risk (18-15)       | 0.990 (0.94-1.04) | NS  | 0.899 (0.85-0.95) | *** | 1.957 (1.91-2.23) | *** | 2.139 (1.96-2.34) | *** | 1.198 (1.10-1.30) | *** | 1.184 (1.11-1.27) | *** | 1.696 (1.56-1.84) | *** | 1.708 (1.58-1.85) | *** |
|                          | Higher risk (16-19)           | 0.993 (0.91-1.08) | NS  | 0.984 (0.81-0.98) | *   | 3.622 (3.08-4.26) | *** | 3.608 (3.21-4.06) | *** | 1.422 (1.26-1.61) | *** | 1.353 (1.22-1.50) | *** | 2.489 (2.22-2.79) | *** | 2.525 (2.26-2.82) | *** |
|                          | Dependence (20+)              | 0.902 (0.82-0.99) | *   | 0.846 (0.76-0.94) | **  | 5.128 (4.35-6.05) | *** | 5.096 (4.51-5.76) | *** | 1.612 (1.41-1.84) | *** | 1.434 (1.29-1.61) | *** | 3.618 (3.21-4.08) | *** | 3.572 (8.18-4.02) | *** |
| <b>Sex</b>               | Female <sup>€</sup>           |                   |     |                   |     |                   |     |                   |     |                   |     |                   |     |                   |     |                   |     |
|                          | Male                          | 1.054 (1.00-1.11) | *   | 1.655 (1.56-1.75) | *** | 1.542 (1.38-1.72) | *** | 1.107 (0.94-1.10) | NS  | 0.863 (0.80-0.93) | *** | 0.761 (0.72-0.81) | *** | 0.521 (0.49-0.56) | *** | 0.587 (0.55-0.93) | *** |

AUDIT, alcohol use disorders identification test; AOR, adjusted odds ratios; CI, confidence intervals; NS, non significant.

\*p<0.05, \*\*p<0.01, \*\*\*p<0.001.

†Country of residence, age and educational attainment was also included in the logistic regression model. See online Supplementary Table E.

‡Emotions from drinking respondents reported regardless of the type of alcohol they associate it with. Includes emotions associated with drinking spirits, white wine, red wine and beer.

§Respondents reported which drink type they mostly drank when at home and when out

€reference category

## DISCUSSION

Using an international sample, our study found that different types of alcohol make people feel differently, eliciting both positive and negative emotions (Table 1), and highlights the complex relationships between drink choice, emotions and the settings in which alcohol is consumed. Emotions were found to differ substantially between different groups of the population and these relationships were maintained after accounting for confounding socio-demographics and level of alcohol dependency (Table 3). The association between drinking spirits and the emotion of aggression was a key finding with 29.8% of respondents reporting this relationship, significantly higher than other types of alcohol ( $p < 0.001$ ; Table 1). Dependent drinkers (AUDIT  $> 20$ ) were found to rely on alcohol to obtain the positive emotions they associated with drinking, being five times more likely to feel energised compared to low risk drinkers (Adjusted Odds Ratio (AOR) 4.7; 95%CI 4.07-5.50; Table 3). However, heavier drinkers also reported negative emotions more frequently with respondents being just over six times more likely to report feelings of aggression (AOR 6.4; 95%CI 5.79-7.09;  $p < 0.001$ ; Table 3), which may in part be a result of drinking greater quantities of alcohol in a session so increasing the impact on emotions. These results are consistent with existing evidence on alcohol dependence.[22] Females more frequently reported all emotions apart from feelings of aggression and younger age groups more frequently reported all emotions with the exception of aggression and tiredness (Table 3). Our findings support previous research which highlights that male beer drinkers show less aggression than males who drink spirits (Table 4).[23] Spirits are a popular choice of drink in a number of countries, with substantial proportions of the population consuming spirits on a regular basis.[24] Within our sample, spirits were more likely than beer, red wine and white wine to elicit the majority of positive emotions when consumed. However, they were also more likely to be associated with negative emotions (Table 4). These findings suggest that individuals make the assumption that positive emotions associated with drinking particular types of alcohol such as spirits will outweigh the negative emotions. Finally, our results show that individuals dependent on alcohol more frequently associated emotions with alcohol whether they were drinking at home or when out (Table 5).

Existing literature illustrates that previous experiences with alcohol are related to intentions to drink alcohol in the future.[25] Our analyses demonstrate how individuals are, to some extent, consuming beverages in different settings based on the emotions they perceive to be associated with particular types of alcohol (Table 5). These findings suggest that individuals inadvertently select drinks which are known to elicit negative emotions because they crave the positive emotions that go with them, and link with existing evidence that those dependent on alcohol drink alcohol as a coping mechanism, rather than drinking for pleasure.[7] This was evident particularly amongst heavier drinkers. This highlights a potential emotional gap which individuals may be looking to fill by drinking alcohol. This gap can be a concern, particularly with exploitation by the alcohol industry with advertising focused on pushing the positive emotions associated with alcohol use without outlining the negatives which go alongside them.

Understanding the relationship between different types of alcohol and the emotions and associated behaviours they may elicit may help improve public health messages and health promotion, and may help to prevent escalation to dependent drinking.[6-7, 10] The results from this study can be used to influence behaviour change policy and contribute significantly to the limited evidence base on alcohol use and emotions. Previous studies have tended to focus on the effect of alcohol as a whole.[5-6] These results suggest that the different types of alcohol are not necessarily perceived or used in the same way and therefore harm prevention policy may benefit from treating types of drinks differently; especially when addressing spirits and, for instance their significant association with aggression (Table 4).

The large sample used for analyses within this study includes a high proportion of younger age respondents who can be difficult to capture via telephone or face-to-face interviews. This age group corresponds with age groups often studied within this field of research, for example students and adolescents.[5, 15, 25] Using a unique range of questions which asked about alcohol use and emotions associated with individual types of alcohol, the survey data

1 allowed for novel analysis on how groups within the survey population associate emotions with different types of  
2 alcohol in different settings.

3 However, this research has a number of important limitations. Although the sample size for the study is large, the  
4 opportunistic nature of the survey means it should not be considered representative of any country or region. As the  
5 sample was self-selected, there may be an over-representation of individuals who are more likely to participate in  
6 drug and alcohol use. The sample will be biased towards those with access to the internet, and is not representative  
7 of national populations. However, confounders of socio-demographics and alcohol dependency were accounted for  
8 in the analysis to illustrate the associations between emotions and drink types in different groups of the population.  
9 This study uses data which has been self-reported by respondents and the emotions associated with alcohol  
10 consumption may have been affected by confounding factors such as mood prior to drinking and mixing of alcohol  
11 drink type in individual drinking sessions which were unable to be controlled for. Additionally, without knowledge  
12 about the amount of alcohol consumed and the rate at which it was drunk, such inferences remain speculative.  
13 Respondents may have also undertaken other activities while consuming specific drinks such as dancing, socialising  
14 and drug use, which may have affected emotions reported to be associated with each drink type. We also cannot  
15 rule out the impact of recall bias and the deliberate misreporting of results.  
16  
17  
18  
19

20 Further research is required into why people choose to consume specific drink types in different settings, their mood  
21 prior to drinking and drinking patterns including combination of drinks consumed on individual occasions. This arena  
22 of evidence may also benefit from additional qualitative research to further understand how alcohol makes people  
23 feel and how this affects drink choice in different settings. Research using an experimental approach is also an area  
24 for future research to examine the immediate effects on individual emotions when consuming alcohol.  
25  
26

## 27 **CONCLUSION**

28  
29 This research adds international evidence to the limited number of studies undertaken on the feelings associated  
30 with drinking different types of alcohol and how this influences what alcohol is being drunk in different settings.  
31 Commonly, the evidence around alcohol and its relationship with emotions has been based on scientific effects on  
32 the brain or directly on drinking motives and alcohol expectancies. This research outlines the differences between  
33 self-reported emotions perceived by the individual as related to the consumption of different types of alcohol  
34 amongst different groups of individuals. Results from these analyses can be used by public health bodies to  
35 understand alcohol consumption behaviour and to inform strategies and interventions to promote behaviour change  
36 with regards to alcohol consumption, particularly amongst heavier drinkers.  
37  
38  
39  
40  
41

## 42 **Contributorship statement**

43  
44 Adam Winstock developed and directed the survey. Mark A Bellis conceived and designed the survey questions on  
45 alcohol. Adam Winstock coordinated data collection and Kathryn Ashton carried out data cleaning on the alcohol  
46 data. Kathryn Ashton performed the statistical analyses and drafted the manuscript. Kathryn Ashton, Mark A Bellis,  
47 Alisha Davies, Karen Hughes and Adam Winstock edited and approved the final manuscript.  
48  
49  
50  
51  
52  
53  
54  
55  
56  
57  
58  
59  
60

## REFERENCES

1. World Health Organisation. *Global status report on alcohol and health 2014*. Geneva: World Health Organisation. 2014. [http://www.who.int/substance\\_abuse/publications/global\\_alcohol\\_report/en/](http://www.who.int/substance_abuse/publications/global_alcohol_report/en/) (accessed 16 November 2016).
2. Lewis-Laietmark C, Wettlaufer A, Shield KD, et al. The effects of alcohol-related harms to others on self-perceived mental well-being in a Canadian sample. *Int J Public Health*. 2016:Nov 29.[epub ahead of print].
3. Lund IO, Moan IS and Storvoll EE. Harm from others' drinking: How problematic do people with and without experiences of harm perceive it to be? *Int J Drug Policy* 2016;12(38):43-49.
4. Bellis MA, Quigg Z, Hughes, et al. Harms from other people's drinking: an international survey of their occurrence, impacts on feeling safe and legislation relating to their control. *BMJ Open* 2015;5(12):e010112.
5. Luhtanen RK and Crocker J. Alcohol use in college students: effects of level of self-esteem, narcissism, and contingencies of self-worth. *Psychology of Addictive Behaviours* 2005;19(1):99-103.
6. Cooper LM, Frone MR, Russell M et al. Drinking to regulate positive and negative emotions: a motivational model of alcohol use. *J Pers Soc Psychol* 1995;69(5):990-1005.
7. Kuntsche E, Knibbe R, Gmel G, et al. 'I drink spirits to get drunk and block out my problems...' Beverage preference, drinking motives and alcohol use in adolescence. *Alcohol and Alcoholism* 2006;41(5):566-573.
8. Cox MW, Hosier SG, Crossley S, et al. Motive for drinking, alcohol consumption, and alcohol-related problems among British secondary-school and university students. *Addict Behav* 2006;31(12): 2147-2157.
9. Goldstein AL and Flett GL. Personality, alcohol use, and drinking motives: a comparison of independent and combined internal drinking motives groups. *Behav Modif* 2009;33(2):182-98.
10. Engels RCME, Wiers R, Lemmers L, et al. Drinking motives, alcohol expectancies, self-efficacy and drinking patterns. *Journal of Drugs and Education* 2005;35(2):147-166.
11. Tucker JA, Vuchinich RE and Sobell MB. Alcohol's effects on human emotions: a review of the stimulation/depression hypothesis. *The International Journal of Addictions* 1982;17(1):155-180.
12. Heath DB. Some Generalizations about Alcohol and Culture. In Heath DB, ed. *International Handbook on Alcohol and Culture*. Greenwood Press, Westport, CT. 1995:350-351.
13. Fairbairn CE and Sayette MA. The Effect of Alcohol on Emotional Inertia: A Test of Alcohol Myopia. *J Abnorm Psychol* 2013;122(3):770-781.
14. Bushman BJ. Human aggression while under the influence of alcohol and other drugs: an integrative research review. *Curr Dir Psychol Sci* 1993;2:148-52.
15. Wiers RW, Beckers L, Jouben K, et al. A short fuse after alcohol: Implicit power associations predict aggressiveness after alcohol consumption in young heavy drinkers with limited executive control. *Pharmacol BioChem Behav* 2009;93(3):300-305.
16. Marmorstein NR. Longitudinal associations between alcohol problems and depressive symptoms: early adolescence through early adulthood. *Alcohol Clin Exp Res* 2009;33(1):49-59.
17. Mitchell JM, O'Neil JP, Janabi M, et al. Alcohol consumption induces endogenous opioid release in the human orbitofrontal cortex and nucleus accumbens. *Sci Transl Med* 2012;11(4):166.
18. Global Drug Survey 2016. <https://www.globaldrugsurvey.com/> [Accessed 14 November 2016].
19. Winstock A, Lynskey M, Borschmann R, et al. Risk of emergency medical treatment following consumption of cannabis or synthetic cannabinoids in a large global sample. *J Psychopharmacol* 2015;29(6):698-703.
20. Kaar SJ, Ferris J, Waldron J, et al. Up: The rise of nitrous oxide abuse. An international survey of contemporary nitrous oxide use. *J Psychopharmacol* 2016;30(4):395-401.
21. Babor T, Higgins-Biddle J, Saunders J, et al. *AUDIT. The alcohol use disorders identification test. Guidelines for use in primary care*. 2<sup>nd</sup> edn. Geneva: World Health Organisation. 2001. [http://www.talkingalcohol.com/files/pdfs/WHO\\_audit.pdf](http://www.talkingalcohol.com/files/pdfs/WHO_audit.pdf) (accessed 15 November 2016).
22. Herz A. Endogenous opioid systems and alcohol addiction. *Psychopharmacology* 1997;129(2):99-111.
23. Smart RG. Behavioural and social consequences related to the consumption of different beverage types. *J Stud Alcohol* 1996;57:77-84.
24. World Health Organisation. *Global status report on alcohol and health*. 2011. [http://www.who.int/substance\\_abuse/publications/global\\_alcohol\\_report/msbgsruprofiles.pdf](http://www.who.int/substance_abuse/publications/global_alcohol_report/msbgsruprofiles.pdf) [accessed 09 November 2016].

25. Aas H, Klepp KI, Labery JC, et al. Predicting adolescents' intentions to drink alcohol: outcome expectancies and self-efficacy. *J Stud on Alcohol* 1995;56(3):293-299.

1  
2  
3  
4  
5  
6  
7  
8  
9  
10  
11  
12  
13  
14  
15  
16  
17  
18  
19  
20  
21  
22  
23  
24  
25  
26  
27  
28  
29  
30  
31  
32  
33  
34  
35  
36  
37  
38  
39  
40  
41  
42  
43  
44  
45  
46  
47  
48  
49  
50  
51  
52  
53  
54  
55  
56  
57  
58  
59  
60

For peer review only

Supplementary Table A: Sample demographics

|                             |                        | %     | n     |
|-----------------------------|------------------------|-------|-------|
| <b>Sex</b>                  | Male                   | 66.81 | 19934 |
|                             | Female                 | 33.19 | 9902  |
| <b>Age (years)</b>          | 18-24                  | 54.74 | 16333 |
|                             | 25-29                  | 29.31 | 8744  |
|                             | 30-34                  | 15.95 | 4759  |
| <b>Attended high school</b> | No                     | 1.58  | 471   |
|                             | Yes                    | 98.42 | 29365 |
| <b>AUDIT</b>                | Lower risk (0-7)       | 35.45 | 10577 |
|                             | Increasing risk (8-15) | 47.61 | 14205 |
|                             | Higher risk (16-19)    | 9.70  | 2895  |
|                             | Dependence (20+)       | 7.24  | 2159  |
| <b>Country of residence</b> | Australia              | 4.56  | 1360  |
|                             | Austria                | 2.95  | 880   |
|                             | Belgium                | 1.27  | 378   |
|                             | Brazil                 | 0.71  | 213   |
|                             | Canada                 | 1.57  | 468   |
|                             | Colombia               | 1.25  | 372   |
|                             | France                 | 4.95  | 1478  |
|                             | Germany                | 34.50 | 10294 |
|                             | Hungary                | 3.54  | 1055  |
|                             | Ireland                | 0.77  | 230   |
|                             | Italy                  | 4.25  | 1268  |
|                             | Mexico                 | 0.70  | 210   |
|                             | Netherlands            | 5.75  | 1715  |
|                             | New Zealand            | 4.56  | 1360  |
|                             | Norway                 | 2.62  | 782   |
|                             | Portugal               | 0.79  | 237   |
| Spain                       | 2.32                   | 692   |       |
| Sweden                      | 1.05                   | 312   |       |
| Switzerland                 | 7.47                   | 2230  |       |
| United Kingdom              | 8.73                   | 2604  |       |
| United States               | 5.69                   | 1698  |       |

AUDIT, alcohol use disorders identification test



Supplementary Table B: Logistic regression model<sup>¶</sup> for country of residence and relationships with emotions associated with drinking any type of alcohol<sup>€</sup>

|                             |      | Emotions associated with drinking any type of alcohol** |    |                   |    |                   |    |                   |    |                   |    |                   |    |                               |    |                   |    |                   |    |
|-----------------------------|------|---------------------------------------------------------|----|-------------------|----|-------------------|----|-------------------|----|-------------------|----|-------------------|----|-------------------------------|----|-------------------|----|-------------------|----|
|                             |      | Energised                                               |    | Relaxed           |    | Sexy              |    | Confident         |    | Tired             |    | Aggressive        |    | Ill                           |    | Restless          |    | Tearful           |    |
|                             |      | AOR (95% CI)                                            | p  | AOR (95% CI)      | p  | AOR (95% CI)      | p  | AOR (95% CI)      | p  | AOR (95% CI)      | p  | AOR (95% CI)      | p  | AOR (95% CI)                  | p  | AOR (95% CI)      | p  | AOR (95% CI)      | p  |
| Country                     | n    |                                                         |    |                   |    |                   |    |                   |    |                   |    |                   |    |                               |    |                   |    |                   |    |
| United Kingdom <sup>‡</sup> | 2604 |                                                         |    |                   |    |                   |    |                   |    |                   |    |                   |    |                               |    |                   |    |                   |    |
| Germany                     | 1029 |                                                         | ** | **                | ** | **                | ** | **                | ** | **                | ** | **                | ** | **                            | ** | **                | ** | **                | ** |
|                             | 4    | 0.392 (0.35-4.41)                                       | *  | 0.716 (0.62-0.83) | *  | 0.799 (0.73-0.88) | *  | 0.480 (0.42-0.54) | *  | 0.797 (0.69-0.93) | ** | 0.691 (0.63-0.76) | *  | 0.219 (0.19-0.25)             | ** | 0.788 (0.72-0.86) | *  | 0.811 (0.74-0.89) | *  |
| Switzerland                 | 2230 | 0.713 (0.62-0.83)                                       | *  | 0.715 (0.60-0.86) | *  | 0.981 (0.87-1.11) | NS | 0.564 (0.49-0.66) | *  | 1.130 (0.92-1.39) | NS | 0.871 (0.77-0.99) | *  | 0.21                          | *  | 1.22              | NS | 0.66              | *  |
| Netherlands                 | 1715 | 0.785 (0.66-0.93)                                       | ** | 0.905 (0.73-1.12) | NS | 1.353 (1.18-156)  | *  | 0.739 (0.62-0.88) | ** | 0.651 (0.53-0.80) | *  | 0.646 (0.57-0.74) | *  | 0.783 (0.66-0.94)             | ** | 0.748 (0.66-0.85) | *  | 0.644 (0.57-0.73) | *  |
| US                          | 1698 | 1.008 (0.85-1.20)                                       | NS | 1.524 (1.20-1.93) | ** | 1.574 (1.37-1.81) | *  | 1.068 (0.89-1.28) | NS | 0.823 (0.67-1.01) | NS | 1.352 (1.19-1.54) | *  | 0.747 (0.63-0.89)             | ** | 1.002 (0.88-1.14) | NS | 1.114 (0.98-1.27) | NS |
| New Zealand                 | 1360 | 0.904 (0.76-1.08)                                       | NS | 1.337 (1.04-1.71) | *  | 1.016 (0.88-1.17) | NS | 1.064 (0.88-1.28) | NS | 0.550 (0.45-0.68) | *  | 0.896 (0.78-1.03) | NS | 0.874 (0.72-1.06)             | NS | 1.089 (0.95-1.25) | NS | 0.916 (0.80-1.05) | NS |
| France                      | 1478 | 0.958 (0.80-1.14)                                       | NS | 0.934 (0.75-1.17) | NS | 0.881 (0.77-1.01) | NS | 0.617 (0.52-0.73) | *  | 0.360 (0.30-0.43) | *  | 0.936 (0.82-1.07) | NS | 0.777 (0.65-0.93)             | ** | 2.292 (2.01-2.62) | *  | 0.826 (0.72-0.95) | ** |
| Australia                   | 1360 | 0.715 (0.60-0.85)                                       | *  | 1.616 (1.24-2.11) | *  | 0.918 (0.80-1.06) | NS | 0.850 (0.71-1.02) | NS | 0.728 (0.59-0.90) | ** | 0.628 (0.54-0.73) | *  | 0.792 (0.66-0.95)             | *  | 0.891 (0.78-1.02) | NS | 0.904 (0.79-1.04) | NS |
| Hungary                     | 1055 | 0.886 (0.73-1.07)                                       | NS | 0.346 (0.28-0.42) | *  | 1.198 (1.03-1.40) | *  | 0.682 (0.57-0.82) | *  | 0.438 (0.36-0.54) | ** | 0.882 (0.76-1.03) | NS | 0.756 (0.62-0.92)             | ** | 0.576 (0.49-0.68) | ** | 0.728 (0.62-0.85) | *  |
| Italy                       | 1268 | 0.885 (0.74-1.06)                                       | NS | 0.551 (0.45-0.68) | *  | 0.898 (0.78-1.04) | NS | 0.393 (0.33-0.46) | *  | 0.319 (0.26-0.39) | *  | 1.089 (0.94-1.26) | NS | 0.294 (0.25-0.35)             | *  | 0.622 (0.54-0.72) | ** | 0.455 (0.39-0.53) | *  |
| Spain                       | 692  | 1.018 (0.81-1.28)                                       | NS | 0.453 (0.36-0.57) | *  | 0.861 (0.72-1.03) | NS | 0.886 (0.70-1.11) | NS | 0.432 (0.34-0.55) | *  | 0.813 (0.68-0.98) | *  | 0.180 (0.15-0.22)             | *  | 0.977 (0.82-1.16) | NS | 0.670 (0.56-0.81) | *  |
| Colombia                    | 372  | 2.404 (1.63-3.55)                                       | *  | 1.481 (0.96-2.30) | NS | 2.339 (1.79-3.06) | *  | 1.044 (0.76-1.43) | NS | 0.558 (0.41-0.76) | *  | 0.937 (0.74-1.18) | NS | 0.335 (0.26-0.43)             | *  | 1.946 (1.56-2.43) | ** | 1.284 (1.02-1.61) | *  |
| Austria                     | 880  | 0.493 (0.41-0.59)                                       | *  | 0.849 (0.66-1.09) | NS | 0.939 (0.80-1.11) | NS | 0.549 (0.45-0.67) | *  | 0.826 (0.64-1.06) | NS | 0.877 (0.74-1.03) | NS | 0.213 (0.18-0.26)             | *  | 0.900 (0.77-1.06) | NS | 0.785 (0.67-0.93) | ** |
| Norway                      | 782  | 1.919 (1.47-2.50)                                       | *  | 2.106 (1.46-3.04) | *  | 1.470 (1.23-1.76) | *  | 1.100 (0.87-1.40) | NS | 0.850 (0.65-1.11) | NS | 1.358 (1.15-1.60) | *  | 1.169 (0.91-1.50)             | NS | 1.889 (1.60-2.23) | ** | 1.222 (1.03-1.44) | *  |
| Canada                      | 468  | 1.043 (0.79-1.37)                                       | NS | 1.781 (1.17-2.71) | ** | 1.256 (1.01-1.57) | *  | 0.806 (0.62-1.05) | NS | 0.529 (0.40-0.71) | *  | 1.105 (0.90-1.36) | NS | 0.641 (0.49-0.83)             | ** | 1.003 (0.82-1.23) | NS | 0.951 (0.77-1.17) | NS |
| Mexico                      | 210  | 1.134 (0.76-1.69)                                       | NS | 1.647 (0.90-3.01) | NS | 1.423 (1.03-1.96) | *  | 0.901 (0.61-1.33) | NS | 0.390 (0.27-0.56) | *  | 1.150 (0.86-1.55) | NS | 0.230 (0.17-0.31)             | ** | 1.283 (0.96-1.71) | NS | 1.060 (0.79-1.42) | NS |
| Belgium                     | 378  | 0.613 (0.47-0.80)                                       | *  | 0.935 (0.64-1.36) | NS | 1.043 (0.83-1.32) | NS | 0.685 (0.51-0.91) | ** | 0.538 (0.39-0.74) | *  | 0.776 (0.62-0.98) | *  | 0.905 (0.66-0.751 (0.51-1.24) | NS | 0.731 (0.58-0.92) | ** | 0.700 (0.56-0.88) | ** |
| Brazil                      | 213  | 0.995 (0.68-1.45)                                       | NS | 2.375 (1.20-4.71) | *  | 3.943 (2.61-5.96) | *  | 1.189 (0.79-1.80) | NS | 0.702 (0.46-1.08) | NS | 1.173 (0.87-1.58) | NS | 1.10                          | NS | 1.985 (1.49-2.64) | *  | 1.241 (0.93-1.66) | NS |
| Portugal                    | 237  | 0.848 (0.60-1.19)                                       | NS | 0.659 (0.44-0.98) | *  | 1.079 (0.81-1.44) | NS | 0.514 (0.37-0.71) | *  | 0.395 (0.28-0.56) | *  | 0.608 (0.45-0.83) | ** | 0.253 (0.19-0.34)             | *  | 1.264 (0.96-1.66) | NS | 0.603 (0.45-0.81) | ** |
| Sweden                      | 312  | 1.481 (1.04-2.10)                                       | *  | 2.078 (1.21-3.56) | ** | 1.127 (0.88-1.45) | NS | 0.886 (0.64-1.22) | NS | 1.041 (0.69-1.57) | NS | 0.851 (0.66-1.09) | NS | 1.068 (0.75-1.51)             | NS | 1.409 (1.11-1.79) | ** | 1.049 (0.82-1.34) | NS |
| Ireland                     | 230  | 1.411 (0.91-2.19)                                       | NS | 0.795 (0.50-1.25) | NS | 0.809 (0.61-1.08) | NS | 0.547 (0.39-0.77) | ** | 0.711 (0.69-0.93) | NS | 1.038 (0.78-1.37) | NS | 0.761 (0.52-1.11)             | NS | 1.212 (0.92-1.60) | NS | 1.164 (0.88-1.54) | NS |

AOR, adjusted odds ratio; CI, confidence interval; NS, not significant.

\*p&lt;0.05, \*\*p&lt;0.01, \*\*\*p&lt;0.001.

<sup>¶</sup>Country variable was included in the logistic regression model for Table 3 and has been included in separate supplementary table due to space restrictions.<sup>€</sup>Emotions from drinking respondents reported regardless of the type of alcohol they associate it with. Includes emotions associated with spirits, white wine, red wine and beer.<sup>‡</sup>reference category.

Supplementary Table C: Bivariate relationship between emotions associated with drinking individual types of alcohol and AUDIT and socio-demographics (%)

|                             |                        | n     | Positive emotions |         |         |           | Negative emotions |            |         |          |         |
|-----------------------------|------------------------|-------|-------------------|---------|---------|-----------|-------------------|------------|---------|----------|---------|
|                             |                        |       | Energised         | Relaxed | Sexy    | Confident | Tired             | Aggressive | Ill     | Restless | Tearful |
| <b>Spirits</b>              |                        |       |                   |         |         |           |                   |            |         |          |         |
| <b>AUDIT</b>                | Lower risk (0-7)       | 10577 | 45.49             | 19.72   | 33.69   | 48.54     | 17.37             | 16.70      | 43.53   | 20.65    | 15.26   |
|                             | Increasing risk (8-15) | 14205 | 62.73             | 19.64   | 45.05   | 62.22     | 14.24             | 32.64      | 49.28   | 29.45    | 23.20   |
|                             | Higher risk (16-19)    | 2895  | 70.92             | 21.49   | 52.54   | 71.16     | 14.68             | 45.35      | 52.82   | 35.13    | 30.95   |
|                             | Dependence (20+)       | 2159  | 75.82             | 23.85   | 54.24   | 73.83     | 13.34             | 54.93      | 52.62   | 42.33    | 38.40   |
|                             | $\chi^2$               |       | 1290.803          | 25.102  | 615.502 | 912.888   | 54.348            | 1908.209   | 139.037 | 593.266  | 758.589 |
|                             | p                      |       | ***               | ***     | ***     | ***       | ***               | ***        | ***     | ***      | ***     |
| <b>Sex</b>                  |                        |       |                   |         |         |           |                   |            |         |          |         |
|                             | Male                   | 19934 | 56.89             | 20.77   | 39.10   | 58.32     | 16.67             | 31.52      | 46.60   | 26.81    | 18.89   |
|                             | Female                 | 9902  | 61.37             | 18.91   | 49.09   | 60.59     | 12.62             | 26.43      | 50.29   | 29.82    | 28.97   |
|                             | $\chi^2$               |       | 55.222            | 14.350  | 270.432 | 14.118    | 83.462            | 82.042     | 36.181  | 29.830   | 388.839 |
|                             | p value                |       | ***               | ***     | ***     | ***       | ***               | ***        | ***     | ***      | ***     |
| <b>Age (years)</b>          |                        |       |                   |         |         |           |                   |            |         |          |         |
|                             | 18-24                  | 16333 | 64.02             | 19.06   | 46.44   | 63.77     | 14.73             | 29.82      | 48.82   | 29.95    | 23.66   |
|                             | 25-29                  | 8744  | 54.07             | 20.17   | 39.30   | 55.38     | 15.37             | 30.23      | 47.47   | 26.81    | 21.25   |
|                             | 30-34                  | 4759  | 46.84             | 23.87   | 34.33   | 49.78     | 17.29             | 29.14      | 45.07   | 22.34    | 19.16   |
|                             | $\chi^2$               |       | 541.325           | 53.009  | 270.366 | 368.307   | 18.666            | 1.724      | 21.304  | 112.493  | 50.157  |
|                             | p                      |       | ***               | ***     | ***     | ***       | ***               | NS         | ***     | ***      | ***     |
| <b>Attended high school</b> |                        |       |                   |         |         |           |                   |            |         |          |         |
|                             | Yes                    | 29365 | 58.20             | 20.03   | 42.33   | 58.89     | 15.27             | 29.70      | 47.73   | 27.80    | 22.07   |
|                             | No                     | 471   | 68.79             | 27.81   | 47.56   | 70.91     | 18.68             | 38.43      | 54.14   | 28.45    | 32.91   |
|                             | $\chi^2$               |       | 21.412            | 17.448  | 5.183   | 27.733    | 4.1540            | 16.8920    | 7.6490  | 0.0970   | 31.5090 |
|                             | p                      |       | ***               | ***     | *       | ***       | *                 | ***        | **      | NS       | ***     |
| <b>Red wine</b>             |                        |       |                   |         |         |           |                   |            |         |          |         |
| <b>AUDIT</b>                | Lower risk (0-7)       | 10577 | 5.56              | 50.23   | 20.85   | 23.22     | 58.70             | 1.47       | 14.67   | 3.97     | 11.62   |
|                             | Increasing risk (8-15) | 14205 | 7.32              | 54.04   | 26.45   | 29.06     | 60.63             | 2.44       | 19.91   | 5.00     | 18.16   |
|                             | Higher risk (16-19)    | 2895  | 8.74              | 54.51   | 30.78   | 32.88     | 61.97             | 4.46       | 26.39   | 7.53     | 23.77   |
|                             | Dependence (20+)       | 2159  | 11.49             | 54.93   | 30.85   | 36.27     | 60.63             | 6.25       | 28.30   | 9.17     | 28.02   |
|                             | $\chi^2$               |       | 113.324           | 44.051  | 202.364 | 235.632   | 14.711            | 209.963    | 354.627 | 134.965  | 507.751 |

|    |                             |                        |       |         |         |         |         |         |         |         |         |         |
|----|-----------------------------|------------------------|-------|---------|---------|---------|---------|---------|---------|---------|---------|---------|
| 1  |                             |                        |       |         |         |         |         |         |         |         |         |         |
| 2  |                             |                        |       |         |         |         |         |         |         |         |         |         |
| 3  |                             | p                      |       | ***     | ***     | ***     | ***     | **      | ***     | ***     | ***     | ***     |
| 4  | <b>Sex</b>                  | Male                   | 19934 | 7.62    | 50.61   | 22.12   | 26.29   | 55.52   | 2.47    | 18.15   | 5.07    | 13.62   |
| 5  |                             | Female                 | 9902  | 6.16    | 57.20   | 31.40   | 31.08   | 69.25   | 2.77    | 21.57   | 5.40    | 24.10   |
| 6  |                             | $\chi^2$               |       | 21.275  | 115.233 | 301.899 | 75.578  | 520.004 | 2.364   | 49.602  | 1.477   | 512.269 |
| 7  |                             | p                      |       | ***     | ***     | ***     | ***     | ***     | NS      | ***     | NS      | ***     |
| 8  | <b>Age (years)</b>          | 18-24                  | 16333 | 7.67    | 49.68   | 27.03   | 28.86   | 58.46   | 2.65    | 20.55   | 5.41    | 17.81   |
| 9  |                             | 25-29                  | 8744  | 6.62    | 55.90   | 24.10   | 27.52   | 62.42   | 2.36    | 18.00   | 5.24    | 16.94   |
| 10 |                             | 30-34                  | 4759  | 6.24    | 57.79   | 20.95   | 25.22   | 61.29   | 2.67    | 17.34   | 4.31    | 14.94   |
| 11 |                             | $\chi^2$               |       | 16.32   | 144.807 | 80.309  | 25.113  | 40.660  | 2.216   | 37.596  | 9.132   | 21.645  |
| 12 |                             | p                      |       | ***     | ***     | ***     | ***     | ***     | NS      | ***     | *       | ***     |
| 13 | <b>Attended high school</b> | Yes                    | 29365 | 7.11    | 52.79   | 25.07   | 27.79   | 60.17   | 2.56    | 19.23   | 5.14    | 17.03   |
| 14 |                             | No                     | 471   | 8.70    | 53.50   | 33.12   | 33.55   | 54.35   | 2.97    | 23.14   | 7.86    | 21.23   |
| 15 |                             | $\chi^2$               |       | 1.778   | 0.095   | 15.924  | 7.633   | 6.534   | 0.314   | 4.565   | 6.964   | 5.772   |
| 16 |                             | p                      |       | NS      | NS      | ***     | **      | *       | NS      | *       | **      | *       |
| 17 | <b>White wine</b>           |                        |       |         |         |         |         |         |         |         |         |         |
| 18 | <b>AUDIT</b>                | Lower risk (0-7)       | 10577 | 11.55   | 31.70   | 19.38   | 22.72   | 19.08   | 1.43    | 10.28   | 4.76    | 6.44    |
| 19 |                             | Increasing risk (8-15) | 14205 | 16.11   | 32.81   | 25.11   | 30.14   | 17.67   | 2.77    | 15.19   | 6.33    | 10.22   |
| 20 |                             | Higher risk (16-19)    | 2895  | 18.58   | 34.44   | 28.77   | 33.85   | 19.69   | 4.49    | 20.00   | 9.50    | 14.89   |
| 21 |                             | Dependence (20+)       | 2159  | 20.70   | 34.14   | 29.13   | 35.62   | 16.67   | 6.62    | 23.25   | 11.21   | 18.94   |
| 22 |                             | $\chi^2$               |       | 195.650 | 10.862  | 201.011 | 287.306 | 11.553  | 223.999 | 361.664 | 176.759 | 419.873 |
| 23 |                             | p                      |       | ***     | *       | ***     | ***     | **      | ***     | ***     | ***     | ***     |
| 24 | <b>Sex</b>                  | Male                   | 19934 | 12.82   | 28.21   | 18.29   | 24.04   | 16.51   | 2.60    | 13.21   | 6.06    | 6.85    |
| 25 |                             | Female                 | 9902  | 19.58   | 41.65   | 34.67   | 36.78   | 22.32   | 3.01    | 17.09   | 7.18    | 16.23   |
| 26 |                             | $\chi^2$               |       | 236.235 | 543.290 | 980.770 | 529.645 | 148.465 | 4.093   | 80.084  | 13.799  | 648.311 |
| 27 |                             | p                      |       | ***     | ***     | ***     | ***     | ***     | *       | ***     | ***     | ***     |
| 28 | <b>Age (years)</b>          | 18-24                  | 16333 | 15.67   | 34.68   | 25.98   | 29.76   | 20.98   | 2.45    | 15.49   | 6.23    | 11.62   |
| 29 |                             | 25-29                  | 8744  | 14.67   | 31.08   | 22.42   | 27.57   | 15.95   | 2.80    | 13.53   | 6.62    | 8.46    |
| 30 |                             | 30-34                  | 4759  | 13.72   | 28.68   | 18.39   | 24.44   | 14.29   | 3.61    | 12.88   | 6.77    | 7.04    |
| 31 |                             | $\chi^2$               |       | 12.40   | 74.345  | 129.206 | 54.339  | 160.325 | 18.973  | 29.626  | 2.483   | 117.299 |
| 32 |                             | p                      |       | **      | ***     | ***     | ***     | ***     | ***     | ***     | NS      | ***     |

|    |                        |       |         |         |         |         |         |         |         |         |         |
|----|------------------------|-------|---------|---------|---------|---------|---------|---------|---------|---------|---------|
| 1  |                        |       |         |         |         |         |         |         |         |         |         |
| 2  |                        |       |         |         |         |         |         |         |         |         |         |
| 3  | <b>Attended high</b>   |       |         |         |         |         |         |         |         |         |         |
| 4  | <b>school</b>          |       |         |         |         |         |         |         |         |         |         |
| 5  | Yes                    | 29365 | 15.04   | 32.60   | 23.66   | 28.19   | 18.37   | 2.72    | 14.44   | 6.38    | 9.90    |
| 6  | No                     | 471   | 16.56   | 37.15   | 27.60   | 32.91   | 22.72   | 3.61    | 18.47   | 9.77    | 14.01   |
| 7  | $\chi^2$               |       | 0.836   | 4.379   | 3.970   | 5.083   | 5.830   | 1.363   | 6.090   | 8.842   | 8.742   |
| 8  | p                      |       | NS      | *       | *       | *       | *       | NS      | *       | **      | **      |
| 9  | <b>Beer</b>            |       |         |         |         |         |         |         |         |         |         |
| 10 | <b>AUDIT</b>           |       |         |         |         |         |         |         |         |         |         |
| 11 | Lower risk (0-7)       | 10577 | 18.17   | 43.18   | 14.19   | 34.93   | 37.21   | 3.91    | 15.27   | 6.66    | 6.60    |
| 12 | Increasing risk (8-15) | 14205 | 26.93   | 52.42   | 20.56   | 47.98   | 39.10   | 6.98    | 17.04   | 9.57    | 10.35   |
| 13 | Higher risk (16-19)    | 2895  | 31.47   | 55.54   | 24.21   | 54.75   | 41.52   | 10.67   | 18.55   | 12.54   | 13.96   |
| 14 | Dependence (20+)       | 2159  | 33.67   | 58.22   | 23.44   | 55.21   | 42.57   | 13.52   | 19.08   | 16.67   | 17.46   |
| 15 | $\chi^2$               |       | 444.546 | 323.844 | 261.117 | 684.950 | 33.464  | 365.745 | 32.689  | 263.021 | 324.623 |
| 16 | p                      |       | ***     | ***     | ***     | ***     | ***     | ***     | ***     | ***     | ***     |
| 17 | <b>Sex</b>             |       |         |         |         |         |         |         |         |         |         |
| 18 | Male                   | 19934 | 26.16   | 54.67   | 20.58   | 47.94   | 41.74   | 7.60    | 14.55   | 9.43    | 9.99    |
| 19 | Female                 | 9902  | 21.93   | 40.19   | 15.40   | 37.69   | 33.23   | 4.97    | 21.05   | 9.16    | 9.67    |
| 20 | $\chi^2$               |       | 63.290  | 554.585 | 116.075 | 281.321 | 201.887 | 73.010  | 200.433 | 0.575   | 0.728   |
| 21 | p                      |       | ***     | ***     | ***     | ***     | ***     | ***     | ***     | NS      | NS      |
| 22 | <b>Age (years)</b>     |       |         |         |         |         |         |         |         |         |         |
| 23 | 18-24                  | 16333 | 26.77   | 52.09   | 20.36   | 47.88   | 39.58   | 7.41    | 17.41   | 10.08   | 10.39   |
| 24 | 25-29                  | 8744  | 23.25   | 47.93   | 17.91   | 42.22   | 38.85   | 5.92    | 16.55   | 8.81    | 9.71    |
| 25 | 30-34                  | 4759  | 20.61   | 45.79   | 15.49   | 37.30   | 36.75   | 5.86    | 14.58   | 7.77    | 8.47    |
| 26 | $\chi^2$               |       | 89.98   | 77.123  | 64.484  | 194.018 | 12.448  | 26.736  | 21.430  | 27.385  | 15.704  |
| 27 | p                      |       | ***     | ***     | ***     | ***     | **      | ***     | ***     | ***     | ***     |
| 28 | <b>Attended high</b>   |       |         |         |         |         |         |         |         |         |         |
| 29 | <b>school</b>          |       |         |         |         |         |         |         |         |         |         |
| 30 | Yes                    | 29365 | 24.66   | 49.83   | 18.83   | 44.38   | 38.79   | 6.69    | 16.63   | 9.30    | 9.83    |
| 31 | No                     | 471   | 30.57   | 52.02   | 21.23   | 54.56   | 46.92   | 9.13    | 21.66   | 11.89   | 13.16   |
| 32 | $\chi^2$               |       | 8.696   | 0.886   | 1.754   | 19.482  | 12.901  | 4.403   | 8.4190  | 3.6700  | 5.7780  |
| 33 | p                      |       | **      | NS      | NS      | ***     | ***     | *       | **      | NS      | *       |

AUDIT, alcohol use disorders identification test; NS, not significant.

\*p<0.05, \*\*p<0.01, \*\*\*p<0.001.



|    |                                         |             |       |                   |     |                   |     |                   |     |                   |     |                   |     |                   |     |                    |     |                   |     |                   |     |
|----|-----------------------------------------|-------------|-------|-------------------|-----|-------------------|-----|-------------------|-----|-------------------|-----|-------------------|-----|-------------------|-----|--------------------|-----|-------------------|-----|-------------------|-----|
| 1  |                                         |             |       | 0.712 (0.89-0.87) | *   | 0.702 (0.64-0.77) | *** | 0.539 (0.49-0.60) | *** | 0.526 (0.48-0.58) | *** | 0.834 (0.76-0.92) | *** | 0.329 (0.25-0.43) | *** | 0.362 (0.33-0.40)  | *** | 0.737 (0.60-0.91) | **  | 1.005 (0.90-1.12) | NS  |
| 2  | <b>Country<sup>†</sup></b>              | Germany     | 10294 |                   |     |                   |     |                   |     |                   |     |                   |     |                   |     |                    |     |                   |     |                   |     |
| 3  |                                         |             |       | 0.496 (0.36-0.68) | *** | 0.887 (0.79-1.00) | *   | 0.458 (0.40-0.53) | *** | 0.514 (0.45-0.59) | *** | 2.186 (1.91-2.50) | *** | 0.369 (0.24-0.57) | *** | 0.272 (0.23-0.32)  | *** | 0.740 (0.55-1.00) | NS  | 0.697 (0.59-0.82) | *** |
| 4  |                                         | Switzerland | 2230  |                   |     |                   |     |                   |     |                   |     |                   |     |                   |     |                    |     |                   |     |                   |     |
| 5  |                                         |             |       | 0.809 (0.61-1.07) | NS  | 1.074 (0.95-1.22) | NS  | 0.907 (0.79-1.04) | NS  | 0.824 (0.72-0.94) | **  | 0.796 (0.70-0.91) | **  | 0.348 (0.22-0.54) | *** | 0.521 (0.45-0.60)  | *** | 0.965 (0.72-1.29) | NS  | 0.591 (0.50-0.70) | *** |
| 6  |                                         | Netherlands | 1715  |                   |     |                   |     |                   |     |                   |     |                   |     |                   |     |                    |     |                   |     |                   |     |
| 7  |                                         |             |       | 1.598 (1.26-2.03) | *** | 1.282 (1.13-1.46) | *** | 1.498 (0.32-1.71) | *** | 0.967 (0.85-1.10) | NS  | 1.074 (0.94-1.23) | NS  | 0.728 (0.51-1.03) | NS  | 0.741 (0.64-0.85)  | *** | 1.605 (1.24-2.08) | *** | 1.418 (1.22-1.65) | *** |
| 8  |                                         | US          | 1698  |                   |     |                   |     |                   |     |                   |     |                   |     |                   |     |                    |     |                   |     |                   |     |
| 9  |                                         |             |       | 1.753 (1.36-2.25) | *** | 0.662 (0.58-0.76) | *** | 1.042 (0.90-1.21) | NS  | 1.295 (1.13-1.49) | *** | 0.476 (0.42-0.55) | *** | 1.183 (0.86-1.64) | NS  | 1.277 (1.11-1.47)  | *** | 1.403 (1.05-1.87) | *   | 0.612 (0.51-0.74) | *** |
| 10 |                                         | New Zealand | 1360  |                   |     |                   |     |                   |     |                   |     |                   |     |                   |     |                    |     |                   |     |                   |     |
| 11 |                                         |             |       | 2.634 (2.11-3.29) | *** | 0.652 (0.57-0.74) | *** | 0.741 (0.64-0.86) | *** | 1.022 (0.89-1.17) | NS  | 0.444 (0.39-0.51) | *** | 1.235 (0.91-1.68) | NS  | 0.959 (0.83-1.10)  | NS  | 2.953 (2.33-3.74) | *** | 0.818 (0.69-0.97) | *   |
| 12 |                                         | France      | 1478  |                   |     |                   |     |                   |     |                   |     |                   |     |                   |     |                    |     |                   |     |                   |     |
| 13 |                                         |             |       | 1.049 (0.79-1.39) | NS  | 1.035 (0.91-1.19) | NS  | 0.929 (0.80-1.08) | NS  | 1.012 (0.88-1.16) | NS  | 1.010 (0.88-1.16) | NS  | 0.858 (0.61-1.22) | NS  | 1.033 (0.89-1.19)  | NS  | 1.561 (1.18-2.06) | **  | 0.998 (0.84-1.18) | NS  |
| 14 |                                         | Australia   | 1360  |                   |     |                   |     |                   |     |                   |     |                   |     |                   |     |                    |     |                   |     |                   |     |
| 15 |                                         |             |       | 2.641 (2.07-3.37) | *** | 0.339 (0.29-0.40) | *** | 1.135 (0.97-1.33) | NS  | 0.748 (0.64-0.88) | *** | 0.355 (0.31-0.41) | *** | 1.371 (0.97-1.93) | NS  | 0.748 (0.63-0.89)  | **  | 1.570 (1.16-2.12) | **  | 0.785 (0.64-0.96) | *   |
| 16 |                                         | Hungary     | 1055  |                   |     |                   |     |                   |     |                   |     |                   |     |                   |     |                    |     |                   |     |                   |     |
| 17 |                                         |             |       | 4.045 (3.25-5.03) | *** | 0.613 (0.54-0.70) | *** | 0.945 (0.81-1.10) | NS  | 1.075 (0.93-1.24) | NS  | 0.514 (0.45-0.59) | *** | 1.838 (1.36-2.48) | *** | 0.628 (0.53-0.74)  | *** | 1.542 (1.16-2.06) | **  | 0.740 (0.61-0.90) | **  |
| 18 |                                         | Italy       | 1268  |                   |     |                   |     |                   |     |                   |     |                   |     |                   |     |                    |     |                   |     |                   |     |
| 19 |                                         |             |       | 2.951 (2.26-3.86) | *** | 0.582 (0.49-0.69) | *** | 0.743 (0.61-0.90) | **  | 1.277 (1.07-1.52) | **  | 0.572 (0.48-0.68) | *** | 0.941 (0.60-1.48) | NS  | 0.372 (0.29-0.47)  | *** | 1.645 (1.17-2.32) | **  | 0.667 (0.52-0.85) | **  |
| 20 |                                         | Spain       | 692   |                   |     |                   |     |                   |     |                   |     |                   |     |                   |     |                    |     |                   |     |                   |     |
| 21 |                                         |             |       | 2.062 (1.43-2.97) | *** | 1.114 (0.89-1.39) | NS  | 1.101 (0.87-1.40) | NS  | 0.688 (0.54-0.88) | **  | 0.732 (0.89-0.92) | **  | 0.263 (0.10-0.72) | **  | 0.454 (0.34-0.61)  | *** | 1.671 (1.09-2.56) | *   | 0.824 (0.61-1.11) | NS  |
| 22 |                                         | Colombia    | 372   |                   |     |                   |     |                   |     |                   |     |                   |     |                   |     |                    |     |                   |     |                   |     |
| 23 |                                         |             |       | 0.796 (0.55-1.15) | NS  | 0.793 (0.68-0.93) | **  | 0.623 (0.52-0.75) | *** | 0.685 (0.58-0.81) | *** | 0.597 (0.51-0.70) | *** | 0.380 (0.21-0.69) | **  | 0.287 (0.23-0.36)  | *** | 0.612 (0.39-0.94) | *   | 0.819 (0.66-1.01) | NS  |
| 24 |                                         | Austria     | 880   |                   |     |                   |     |                   |     |                   |     |                   |     |                   |     |                    |     |                   |     |                   |     |
| 25 |                                         |             |       | 3.063 (2.37-3.95) | *** | 1.823 (0.53-2.17) | *** | 1.433 (1.21-1.70) | *** | 1.351 (1.15-1.59) | *** | 0.952 (0.80-1.13) | NS  | 0.600 (0.37-0.98) | *   | 1.098 (0.92-1.31)  | NS  | 1.821 (1.33-2.49) | *** | 1.409 (1.16-1.71) | *** |
| 26 |                                         | Norway      | 782   |                   |     |                   |     |                   |     |                   |     |                   |     |                   |     |                    |     |                   |     |                   |     |
| 27 |                                         |             |       | 2.717 (1.99-3.71) | *** | 1.154 (0.94-1.41) | NS  | 1.641 (1.34-2.01) | *** | 1.253 (1.02-1.54) | *   | 0.674 (0.55-0.83) | *** | 0.940 (0.56-1.59) | NS  | 0.747 (0.59-0.94)  | *   | 1.999 (1.38-2.89) | *** | 1.250 (0.98-1.59) | NS  |
| 28 |                                         | Canada      | 468   |                   |     |                   |     |                   |     |                   |     |                   |     |                   |     |                    |     |                   |     |                   |     |
| 29 |                                         |             |       | 3.000 (1.99-4.53) | *** | 1.147 (0.86-1.53) | NS  | 1.685 (1.26-2.25) | *** | 0.848 (0.62-1.15) | NS  | 0.501 (0.38-0.67) | *** | 1.289 (0.68-2.45) | NS  | 0.502 (0.35-0.72)  | *** | 1.527 (0.88-2.66) | NS  | 1.028 (0.72-1.47) | NS  |
| 30 |                                         | Mexico      | 210   |                   |     |                   |     |                   |     |                   |     |                   |     |                   |     |                    |     |                   |     |                   |     |
| 31 |                                         |             |       | 1.190 (0.77-1.83) | NS  | 1.001 (0.80-1.25) | NS  | 0.773 (0.60-0.99) | *   | 0.698 (0.55-0.89) | **  | 0.889 (0.71-1.11) | NS  | 0.694 (0.37-1.31) | NS  | 0.650 (0.50-0.84)  | **  | 1.114 (0.69-1.81) | NS  | 0.748 (0.56-1.01) | NS  |
| 32 |                                         | Belgium     | 378   |                   |     |                   |     |                   |     |                   |     |                   |     |                   |     |                    |     |                   |     |                   |     |
| 33 |                                         |             |       | 2.112 (1.33-3.36) | **  | 2.018 (1.47-2.77) | *** | 2.751 (2.07-3.66) | *** | 0.924 (0.68-1.25) | NS  | 0.773 (0.58-1.03) | NS  | 0.853 (0.39-1.86) | NS  | 0.439- (0.30-0.64) | *** | 1.372 (0.76-2.48) | NS  | 1.024 (0.72-1.47) | NS  |
| 34 |                                         | Brazil      | 213   |                   |     |                   |     |                   |     |                   |     |                   |     |                   |     |                    |     |                   |     |                   |     |
| 35 |                                         |             |       | 2.885 (1.93-4.32) | *** | 0.879 (0.67-1.15) | NS  | 0.679 (0.49-0.93) | *   | 1.095 (0.83-1.45) | NS  | 0.870 (0.66-1.15) | NS  | 1.390 (0.75-2.57) | NS  | 0.636 (0.46-0.88)  | **  | 1.864 (1.13-3.08) | *   | 0.784 (0.54-1.14) | NS  |
| 36 |                                         | Portugal    | 237   |                   |     |                   |     |                   |     |                   |     |                   |     |                   |     |                    |     |                   |     |                   |     |
| 37 |                                         |             |       | 1.785 (1.18-2.70) | **  | 1.353 (1.06-1.73) | *   | 0.950 (0.73-1.24) | NS  | 1.178 (0.92-1.51) | NS  | 1.279 (0.99-1.65) | NS  | 0.428 (0.17-1.06) | NS  | 1.396 (1.09-1.79)  | **  | 1.548 (0.96-2.50) | NS  | 1.314 (0.98-1.77) | NS  |
| 38 |                                         | Sweden      | 312   |                   |     |                   |     |                   |     |                   |     |                   |     |                   |     |                    |     |                   |     |                   |     |
| 39 |                                         |             |       | 1.563 (0.97-2.52) | NS  | 0.810 (0.62-1.06) | NS  | 0.818 (0.60-1.11) | NS  | 0.700 (0.52-0.95) | *   | 0.674 (0.51-0.89) | **  | 1.052 (0.56-1.99) | NS  | 0.816 (0.60-1.11)  | NS  | 1.299 (0.75-2.26) | NS  | 0.891 (0.63-1.26) | NS  |
| 40 |                                         | Ireland     | 230   |                   |     |                   |     |                   |     |                   |     |                   |     |                   |     |                    |     |                   |     |                   |     |
| 41 |                                         |             |       |                   |     |                   |     |                   |     |                   |     |                   |     |                   |     |                    |     |                   |     |                   |     |
| 42 | <b>White wine</b>                       |             |       |                   |     |                   |     |                   |     |                   |     |                   |     |                   |     |                    |     |                   |     |                   |     |
| 43 |                                         |             |       |                   |     |                   |     |                   |     |                   |     |                   |     |                   |     |                    |     |                   |     |                   |     |
| 44 |                                         |             |       | 0.944 (0.88-1.02) | NS  | 0.891 (0.84-0.95) | *** | 0.898 (0.85-0.95) | *** | 0.967 (0.91-1.03) | NS  | 0.748 (0.70-0.80) | *** | 1.263 (1.07-1.49) | **  | 0.970 (0.90-1.05)  | NS  | 1.132 (1.02-1.26) | *   | 0.791 (0.72-0.87) | *** |
| 45 | <b>Age (years)<sup>€</sup></b>          | 25-29       | 8744  |                   |     |                   |     |                   |     |                   |     |                   |     |                   |     |                    |     |                   |     |                   |     |
| 46 |                                         |             |       | 0.918 (0.93-1.01) | NS  | 0.751 (0.69-0.82) | *** | 0.833 (0.77-0.90) | *** | 0.842 (0.78-0.91) | *** | 0.652 (0.60-0.72) | *** | 1.550 (1.28-1.87) | *** | 0.859 (0.78-0.95)  | **  | 1.128 (0.99-1.29) | NS  | 0.710 (0.63-0.80) | *** |
| 47 |                                         | 30-34       | 4759  |                   |     |                   |     |                   |     |                   |     |                   |     |                   |     |                    |     |                   |     |                   |     |
| 48 |                                         |             |       | 0.946 (0.73-1.22) | NS  | 0.925 (0.75-1.15) | NS  | 0.932 (0.77-1.14) | NS  | 0.865 (0.71-1.06) | NS  | 0.925 (0.74-1.16) | NS  | 0.764 (0.46-1.27) | NS  | 0.917 (0.72-1.17)  | NS  | 0.765 (0.56-1.05) | NS  | 0.765 (0.58-1.01) | NS  |
| 49 | <b>Attended high school<sup>†</sup></b> | Yes         | 29365 |                   |     |                   |     |                   |     |                   |     |                   |     |                   |     |                    |     |                   |     |                   |     |
| 50 |                                         |             |       | 1.156 (1.02-1.32) | *   | 0.942 (0.86-1.03) | NS  | 0.948 (0.86-1.05) | NS  | 0.628 (0.57-0.69) | *** | 0.711 (0.64-0.79) | *** | 0.320 (0.24-0.42) | *** | 0.219 (0.19-0.25)  | *** | 0.671 (0.55-0.82) | *** | 0.656 (0.58-0.75) | *** |
| 51 | <b>Country<sup>†</sup></b>              | Germany     | 10294 |                   |     |                   |     |                   |     |                   |     |                   |     |                   |     |                    |     |                   |     |                   |     |
| 52 |                                         |             |       | 1.780 (1.52-2.09) | *** | 0.487 (0.43-0.56) | *** | 0.749 (0.65-0.87) | *** | 0.601 (0.53-0.69) | *** | 0.700 (0.60-0.82) | *** | 2.883 (2.23-3.74) | *** | 0.391 (0.33-0.46)  | *** | 2.716 (2.20-3.36) | *** | 0.400 (0.32-0.50) | *** |
| 53 |                                         | Switzerland | 2230  |                   |     |                   |     |                   |     |                   |     |                   |     |                   |     |                    |     |                   |     |                   |     |
| 54 |                                         |             |       | 1.047 (0.88-1.25) | NS  | 1.452 (1.28-1.65) | *** | 1.420 (1.24-1.63) | *** | 0.953 (0.84-1.09) | NS  | 1.093 (0.94-1.27) | NS  | 0.538 (0.36-0.80) | **  | 0.695 (0.60-0.81)  | *** | 1.111 (0.86-1.44) | NS  | 0.662 (0.55-0.80) | *** |
| 55 |                                         | Netherlands | 1715  |                   |     |                   |     |                   |     |                   |     |                   |     |                   |     |                    |     |                   |     |                   |     |
| 56 |                                         |             |       | 0.893 (0.74-1.08) | NS  | 1.813 (1.60-2.06) | *** | 1.264 (1.10-1.46) | **  | 0.793 (0.69-0.91) | **  | 1.734 (1.51-1.20) | *** | 0.448 (0.29-0.69) | *** | 0.585 (0.50-0.68)  | *** | 1.231 (0.96-1.59) | NS  | 1.099 (0.92-1.31) | NS  |
| 57 |                                         | US          | 1698  |                   |     |                   |     |                   |     |                   |     |                   |     |                   |     |                    |     |                   |     |                   |     |
| 58 |                                         |             |       | 1.753 (0.47-2.09) | *** | 1.078 (0.94-1.24) | NS  | 1.148 (0.98-1.34) | NS  | 1.376 (1.20-1.58) | *** | 0.899 (0.76-1.07) | NS  | 1.323 (0.96-1.83) | NS  | 1.130 (0.97-1.31)  | NS  | 1.765 (1.38-2.26) | *** | 0.768 (0.62-0.95) | *   |
| 59 |                                         | New Zealand | 1360  |                   |     |                   |     |                   |     |                   |     |                   |     |                   |     |                    |     |                   |     |                   |     |
| 60 |                                         |             |       | 1.427 (1.19-1.71) | *** | 0.984 (0.86-1.13) | NS  | 0.889 (0.76-1.04) | NS  | 0.793 (0.69-0.91) | **  | 1.260 (1.08-1.47) | **  | 1.184 (0.86-1.64) | NS  | 1.159 (1.00-1.34)  | *   | 2.811 (2.25-3.51) | *** | 0.762 (0.62-0.93) | **  |
|    |                                         | France      | 1478  |                   |     |                   |     |                   |     |                   |     |                   |     |                   |     |                    |     |                   |     |                   |     |
|    |                                         |             |       | 1.326 (1.10-1.56) | **  | 1.080 (0.94-1.24) | NS  | 0.877 (0.75-1.00) | NS  | 1.015 (0.88-1.14) | NS  | 0.982 (0.83-1.13) | NS  | 1.136 (0.82-1.56) | NS  | 1.170 (1.01-1.34)  | *   | 1.534 (1.19-2.01) | **  | 0.850 (0.70-1.01) | NS  |
|    |                                         | Australia   | 1360  |                   |     |                   |     |                   |     |                   |     |                   |     |                   |     |                    |     |                   |     |                   |     |





|   |          |     |                       |                       |                       |                      |                       |                       |                       |                       |                       |
|---|----------|-----|-----------------------|-----------------------|-----------------------|----------------------|-----------------------|-----------------------|-----------------------|-----------------------|-----------------------|
| 1 | Canada   | 468 | 1.825 (1.46-2.28) *** | 1.476 (1.21-1.81) *** | 1.644 (1.27-2.13) *** | 1.362 (1.12-1.67) ** | 1.232 (1.01-1.50) *   | 0.981 (0.71-1.36) NS  | 1.264 (1.01-1.58) *   | 1.646 (1.22-2.21) **  | 1.511 (1.11-2.05) **  |
| 2 |          |     | 2.337 (1.73-3.16) *** | 1.518 (1.34-2.03) **  | 1.499 (1.03-2.17) *   | 1.408 (1.06-1.88) *  | 0.764 (0.57-1.02) NS  | 0.912 (0.58-1.45) NS  | 0.794 (0.56-1.13) NS  | 2.355 (1.63-3.42) *** | 1.571 (1.04-2.38) *   |
| 3 | Mexico   | 210 | 1.964 (1.55-2.49) *** | 1.059 (0.85-1.32) NS  | 2.297 (1.77-2.98) *** | 0.963 (0.77-1.20) NS | 0.513 (0.41-0.65) *** | 0.733 (0.50-1.07) NS  | 1.488 (1.17-1.89) **  | 1.053 (0.73-1.52) NS  | 1.501 (1.09-2.08) *   |
| 4 | Belgium  | 378 | 2.153 (1.58-2.93) *** | 1.653 (1.24-2.20) **  | 2.623 (1.89-3.65) *** | 1.275 (0.96-1.70) NS | 1.040 (0.79-1.38) NS  | 0.992 (0.62-1.58) NS  | 0.960 (0.69-1.34) NS  | 2.089 (1.42-3.08) *** | 2.294 (1.57-3.35) *** |
| 5 | Brazil   | 213 | 2.359 (1.77-3.15) *** | 0.766 (0.58-1.01) NS  | 1.467 (1.02-2.11) *   | 0.821 (0.62-1.08) NS | 0.311 (0.23-0.43) *** | 0.391 (0.20-0.75) **  | 0.479 (0.32-0.71) *** | 1.573 (1.05-2.36) *   | 0.832 (0.50-1.39) NS  |
| 6 | Portugal | 237 | 2.462 (1.91-3.17) *** | 1.796 (1.41-2.30) *** | 2.027 (1.52-2.70) *** | 1.471 (1.16-1.87) ** | 1.093 (0.86-1.39) NS  | 0.386 (0.23-0.66) *** | 0.675 (0.49-0.93) *   | 2.556 (1.87-3.49) *** | 1.841 (1.31-2.58) *** |
| 7 | Sweden   | 312 | 1.100 (0.79-1.53) NS  | 1.239 (0.94-1.63) NS  | 1.179 (0.81-1.71) NS  | 1.108 (0.84-1.46) NS | 1.046 (0.80-1.37) NS  | 0.542 (0.33-0.90) *   | 0.853 (0.61-1.19) NS  | 0.821 (0.50-1.34) NS  | 1.031 (0.66-1.61) NS  |
| 8 | Ireland  | 230 |                       |                       |                       |                      |                       |                       |                       |                       |                       |

AOR, adjusted odds ratio; CI, confidence interval; NS, not significant.

\*p<0.05, \*\*p<0.01, \*\*\*p<0.001.

<sup>¶</sup>Country variable was included in the logistic regression model for Table 4 and has been included in separate supplementary table due to space restrictions.

<sup>€</sup>Reference category 18-24 years

<sup>¥</sup>Reference category not attended high school

<sup>†</sup>Reference category United Kingdom

peer review only



Supplementary Table E: Logistic regression model<sup>¶</sup> for age, educational attainment and country of residence and relationships with emotions associated with drinking any type of alcohol<sup>€</sup> in different settings<sup>†</sup>

a: Positive emotions

|                             | n                           | Mostly drank a drink which made you feel energised |                    |                         |                   | Mostly drank mostly a drink which made you feel relaxed |                   |                         |                   | Mostly drank a drink which made you feel sexy |                   |                         |                   | Mostly drank a drink which made you feel confident |                   |                         |                   |     |
|-----------------------------|-----------------------------|----------------------------------------------------|--------------------|-------------------------|-------------------|---------------------------------------------------------|-------------------|-------------------------|-------------------|-----------------------------------------------|-------------------|-------------------------|-------------------|----------------------------------------------------|-------------------|-------------------------|-------------------|-----|
|                             |                             | At home<br>AOR (95%CI)                             | p                  | When out<br>AOR (95%CI) | p                 | At home<br>AOR (95%CI)                                  | p                 | When out<br>AOR (95%CI) | p                 | At home<br>AOR (95%CI)                        | p                 | When out<br>AOR (95%CI) | p                 | At home<br>AOR (95%CI)                             | p                 | When out<br>AOR (95%CI) | p                 |     |
| <b>Age (years)</b>          | 18-24 <sup>‡</sup>          | 16333                                              |                    |                         |                   |                                                         |                   |                         |                   |                                               |                   |                         |                   |                                                    |                   |                         |                   |     |
|                             | 25-29                       | 8744                                               | 0.825 (0.78-0.88)  | ***                     | 0.704 (0.67-0.74) | ***                                                     | 0.966 (0.91-1.02) | NS                      | 1.087 (1.02-1.15) | **                                            | 0.859 (0.81-0.91) | ***                     | 0.759 (0.72-0.80) | ***                                                | 0.832 (0.79-0.88) | ***                     | 0.756 (0.72-0.80) | *** |
|                             | 30-34                       | 4759                                               | 0.817 (0.76-0.88)  | ***                     | 0.563 (0.52-0.60) | ***                                                     | 0.956 (0.89-1.02) | NS                      | 1.097 (1.03-1.17) | **                                            | 0.775 (0.72-0.84) | ***                     | 0.618 (0.57-0.67) | ***                                                | 0.680 (0.64-0.73) | ***                     | 0.555 (0.52-0.59) | *** |
| <b>Attended high school</b> | No <sup>‡</sup>             | 471                                                |                    |                         |                   |                                                         |                   |                         |                   |                                               |                   |                         |                   |                                                    |                   |                         |                   |     |
|                             | Yes                         | 29365                                              | 0.826 (0.68-1.00)  | NS                      | 0.818 (0.68-0.99) | *                                                       | 1.214 (1.00-1.47) | *                       | 1.176 (0.97-1.42) | NS                                            | 0.818 (0.67-1.00) | *                       | 0.918 (0.76-1.11) | NS                                                 | 0.864 (0.71-1.05) | NS                      | 0.782 (0.64-0.96) | *   |
| <b>Country</b>              | United Kingdom <sup>‡</sup> | 2604                                               |                    |                         |                   |                                                         |                   |                         |                   |                                               |                   |                         |                   |                                                    |                   |                         |                   |     |
|                             | Germany                     | 10294                                              | 1.091 (1.03-1.15)  | **                      | 0.467 (0.43-0.51) | ***                                                     | 0.962 (0.88-1.05) | NS                      | 1.338 (1.27-1.41) | ***                                           | 0.952 (0.87-1.05) | NS                      | 0.888 (0.81-0.97) | *                                                  | 0.650 (0.59-0.71) | ***                     | 0.526 (0.48-0.58) | *** |
|                             | Switzerland                 | 2230                                               | 1.087 (0.95-1.24)  | NS                      | 0.787 (0.70-0.89) | ***                                                     | 0.821 (0.73-0.92) | **                      | 1.130 (1.01-1.27) | *                                             | 0.819 (0.72-0.93) | **                      | 1.025 (0.91-1.16) | NS                                                 | 0.570 (0.51-0.64) | ***                     | 0.615 (0.54-0.70) | *** |
|                             | Netherlands                 | 1715                                               | 1.312 (1.15-1.50)  | ***                     | 0.595 (0.53-0.68) | ***                                                     | 0.834 (0.73-0.95) | **                      | 1.362 (1.20-1.54) | ***                                           | 1.458 (0.28-1.66) | ***                     | 0.855 (0.75-0.97) | *                                                  | 0.925 (0.82-1.05) | NS                      | 0.658 (0.58-0.75) | *** |
|                             | US                          | 1698                                               | 1.553 (1.36-1.78)  | ***                     | 0.991 (0.87-1.13) | NS                                                      | 1.328 (1.16-1.52) | ***                     | 1.707 (1.51-1.93) | ***                                           | 1.343 (1.18-1.53) | ***                     | 1.421 (1.25-1.61) | ***                                                | 1.111 (0.98-1.26) | NS                      | 1.042 (0.91-1.20) | NS  |
|                             | New Zealand                 | 1360                                               | 1.321 (0.14-1.53)  | ***                     | 0.695 (0.61-0.80) | ***                                                     | 1.180 (1.03-1.36) | *                       | 2.088 (1.83-2.39) | ***                                           | 1.074 (0.93-1.24) | NS                      | 1.004 (0.87-1.15) | NS                                                 | 1.371 (1.20-1.57) | ***                     | 1.008 (0.87-1.17) | NS  |
|                             | France                      | 1478                                               | 1.560 (0.136-1.80) | NS                      | 1.040 (0.91-1.19) | NS                                                      | 1.077 (0.94-1.23) | NS                      | 1.892 (1.66-2.15) | ***                                           | 0.798 (0.69-0.92) | **                      | 0.944 (0.83-1.08) | NS                                                 | 0.743 (0.65-0.85) | ***                     | 0.631 (0.55-0.72) | *** |
|                             | Australia                   | 1360                                               | 1.106 (0.95-1.29)  | ***                     | 0.628 (0.55-0.72) | ***                                                     | 1.486 (1.28-1.72) | ***                     | 2.388 (2.09-2.73) | ***                                           | 0.850 (0.73-0.98) | *                       | 0.787 (0.68-0.91) | **                                                 | 1.113 (0.97-1.27) | NS                      | 0.934 (0.81-1.08) | NS  |
|                             | Hungary                     | 1055                                               | 1.447 (1.23-1.70)  | NS                      | 0.637 (0.55-0.74) | ***                                                     | 0.521 (0.45-0.60) | ***                     | 1.019 (0.88-1.18) | NS                                            | 1.058 (0.90-1.24) | NS                      | 0.822 (0.70-0.96) | *                                                  | 0.646 (0.56-0.75) | ***                     | 0.469 (0.40-0.55) | *** |
|                             | Italy                       | 1268                                               | 1.159 (0.99-1.35)  | ***                     | 0.696 (0.61-0.80) | ***                                                     | 0.677 (0.59-0.78) | ***                     | 1.148 (1.00-1.32) | *                                             | 0.813 (0.70-0.95) | **                      | 0.823 (0.71-0.95) | **                                                 | 0.607 (0.53-0.70) | ***                     | 0.420 (0.37-0.49) | *** |
|                             | Spain                       | 692                                                | 1.437 (1.19-1.73)  | ***                     | 1.038 (0.87-1.23) | NS                                                      | 0.736 (0.62-0.87) | ***                     | 0.969 (0.81-1.15) | NS                                            | 0.802 (0.66-0.97) | *                       | 0.961 (0.80-1.15) | NS                                                 | 0.896 (0.76-1.06) | ***                     | 0.873 (0.73-1.05) | NS  |
|                             | Colombia                    | 372                                                | 2.063 (1.64-2.59)  | NS                      | 1.547 (1.23-1.95) | ***                                                     | 0.913 (0.73-1.15) | NS                      | 1.079 (0.86-1.35) | NS                                            | 1.338 (1.06-1.68) | *                       | 1.641 (1.31-2.05) | ***                                                | 0.800 (0.64-1.00) | *                       | 0.934 (0.74-1.19) | NS  |
|                             | Austria                     | 880                                                | 0.966 (0.81-1.16)  | ***                     | 0.377 (0.32-0.45) | ***                                                     | 1.083 (0.92-1.28) | NS                      | 1.813 (1.55-2.12) | ***                                           | 0.957 (0.81-1.13) | NS                      | 0.791 (0.67-0.93) | **                                                 | 0.701 (0.60-0.82) | ***                     | 0.463 (0.39-0.54) | *** |
|                             | Norway                      | 782                                                | 1.849 (1.56-2.19)  | ***                     | 0.640 (0.54-0.76) | ***                                                     | 1.427 (1.19-1.71) | ***                     | 2.578 (2.19-3.04) | ***                                           | 1.211 (1.02-1.44) | *                       | 0.758 (0.64-0.90) | **                                                 | 1.221 (1.03-1.44) | *                       | 0.763 (0.64-0.91) | **  |
|                             | Canada                      | 468                                                | 1.509 (1.22-1.87)  | ***                     | 0.950 (0.78-1.16) | NS                                                      | 1.337 (1.08-1.66) | **                      | 1.689 (1.39-2.06) | ***                                           | 1.414 (1.15-1.74) | **                      | 0.972 (0.79-1.20) | NS                                                 | 1.334 (1.09-1.64) | **                      | 0.916 (0.74-1.14) | NS  |
|                             | Mexico                      | 210                                                | 2.016 (1.50-2.70)  | NS                      | 0.996 (0.75-1.33) | NS                                                      | 1.064 (0.79-1.44) | NS                      | 1.736 (1.31-2.30) | ***                                           | 1.130 (0.84-1.53) | NS                      | 1.149 (0.86-1.54) | NS                                                 | 1.098 (0.82-1.47) | NS                      | 1.001 (0.73-1.37) | NS  |
|                             | Belgium                     | 378                                                | 1.021 (0.80-1.31)  | ***                     | 0.588 (0.47-0.73) | ***                                                     | 1.198 (0.95-1.52) | NS                      | 1.741 (1.40-2.16) | ***                                           | 1.196 (0.95-1.50) | NS                      | 0.924 (0.74-1.16) | NS                                                 | 0.655 (0.53-0.82) | ***                     | 0.540 (0.43-0.68) | *** |
|                             | Brazil                      | 213                                                | 1.734 (1.29-2.34)  | *                       | 0.719 (0.54-0.96) | *                                                       | 1.407 (1.03-1.93) | *                       | 2.034 (1.53-2.70) | ***                                           | 1.725 (1.29-2.30) | ***                     | 1.187 (0.89-1.59) | NS                                                 | 0.980 (0.74-1.30) | NS                      | 0.797 (0.59-1.07) | NS  |
|                             | Portugal                    | 237                                                | 1.430 (1.07-1.92)  | ***                     | 0.711 (0.54-0.93) | *                                                       | 0.836 (0.64-1.10) | NS                      | 1.241 (0.95-1.63) | NS                                            | 0.802 (0.59-1.09) | NS                      | 0.819 (0.61-1.09) | NS                                                 | 0.662 (0.51-0.87) | **                      | 0.508 (0.39-0.67) | *** |
|                             | Sweden                      | 312                                                | 1.788 (1.39-2.30)  | NS                      | 0.638 (0.50-0.81) | ***                                                     | 1.275 (0.99-1.65) | NS                      | 1.323 (1.01-1.74) | ***                                           | 1.010 (0.78-1.31) | NS                      | 0.755 (0.58-0.98) | *                                                  | 1.259 (0.99-1.61) | NS                      | 0.690 (0.54-0.89) | **  |
|                             | Ireland                     | 230                                                | 0.965 (0.75-1.07)  | NS                      | 0.543 (0.41-0.72) | ***                                                     | 0.894 (0.67-1.18) | NS                      | 1.332 (1.22-1.46) | *                                             | 0.879 (0.65-1.18) | NS                      | 0.690 (0.52-0.93) | *                                                  | 0.959 (0.73-1.26) | NS                      | 0.650 (0.49-0.87) | **  |

AOR, adjusted odds ratio; CI, confidence interval; NS, not significant.

\*p<0.05, \*\*p<0.01, \*\*\*p<0.001.

<sup>†</sup>Country variable was included in the logistic regression model for Table 5 and has been included in separate supplementary table due to space restrictions.

<sup>‡</sup>Emotions from drinking respondents reported regardless of the type of alcohol they associate it with. Includes emotions associated with spirits, white wine, red wine and beer.

<sup>†</sup>Respondents reported which drink type they mostly drank when at home and when out.

<sup>‡</sup>Reference category

**b: Negative emotions**

|                             |                             |       | Mostly drank a drink which makes you feel tired |     |                   |     | Mostly drank a drink which makes you feel aggressive |     |                   |     | Mostly drank a drink which makes you feel ill |     |                   |     | Mostly drank a drink which makes you feel tearful |     |                   |     |
|-----------------------------|-----------------------------|-------|-------------------------------------------------|-----|-------------------|-----|------------------------------------------------------|-----|-------------------|-----|-----------------------------------------------|-----|-------------------|-----|---------------------------------------------------|-----|-------------------|-----|
|                             |                             |       | When at home                                    |     | When out          |     | When at home                                         |     | When out          |     | When at home                                  |     | When out          |     | When at home                                      |     | When out          |     |
| n                           |                             |       | AOR (95%CI)                                     | p   | AOR (95%CI)       | p   | AOR (95%CI)                                          | p   | AOR (95%CI)       | p   | AOR (95%CI)                                   | p   | AOR (95%CI)       | p   | AOR (95%CI)                                       | p   | AOR (95%CI)       | p   |
| <b>Age (years)</b>          | 18-24 <sup>‡</sup>          | 16333 | 0.986 (0.94-1.04)                               | NS  | 1.147 (1.08-1.22) | *** | 0.884 (0.79-0.99)                                    | *   | 0.774 (0.71-0.84) | *** | 0.995 (0.92-1.08)                             | NS  | 0.851 (0.80-0.91) | *** | 0.897 (0.83-0.97)                                 | **  | 0.893 (0.83-0.96) | **  |
|                             | 25-29                       | 8744  | 0.863 (0.81-0.92)                               | *** | 1.115 (1.04-1.20) | *** | 0.904 (0.78-1.04)                                    | *   | 0.712 (0.64-0.79) | *** | 0.961 (0.87-1.07)                             | NS  | 0.713 (0.65-0.78) | *** | 0.806 (0.73-0.89)                                 | *** | 0.746 (0.67-0.83) | *** |
|                             | 30-34                       | 4759  |                                                 |     |                   |     |                                                      |     |                   |     |                                               |     |                   |     |                                                   |     |                   |     |
| <b>Attended high school</b> | No <sup>‡</sup>             | 471   | 1.008 (0.84-1.22)                               | *   | 0.940 (0.77-1.15) | NS  | 0.799 (0.58-1.09)                                    | NS  | 0.750 (0.59-0.96) | *   | 0.762 (0.60-0.97)                             | *   | 0.717 (0.58-0.88) | *** | 0.754 (0.60-0.95)                                 | *   | 0.735 (0.58-0.93) | **  |
|                             | Yes                         | 29365 |                                                 |     |                   |     |                                                      |     |                   |     |                                               |     |                   |     |                                                   |     |                   |     |
| <b>Country</b>              | United Kingdom <sup>‡</sup> | 2604  | 0.763 (0.70-0.83)                               | *** | 1.400 (1.26-1.55) | *** | 0.447 (0.38-0.53)                                    | *** | 0.559 (0.50-0.63) | *** | 0.436 (0.38-0.50)                             | *** | 0.476 (0.43-0.53) | *** | 0.851 (0.49-0.56)                                 | *** | 0.685 (0.61-0.77) | *** |
|                             | Germany                     | 10294 | 0.797 (0.71-0.89)                               | *** | 0.606 (0.52-0.70) | *** | 0.536 (0.42-0.68)                                    | *** | 0.641 (0.54-0.76) | *** | 0.395 (0.33-0.48)                             | *** | 0.459 (0.40-0.53) | *** | 0.636 (0.53-0.76)                                 | *** | 0.546 (0.46-0.65) | *** |
|                             | Switzerland                 | 2230  | 0.806 (0.71-0.91)                               | **  | 1.387 (1.21-1.60) | *** | 0.636 (0.51-0.80)                                    | *** | 0.503 (0.42-0.60) | *** | 1.062 (0.91-1.25)                             | NS  | 0.830 (0.72-0.95) | **  | 0.761 (0.65-0.90)                                 | **  | 0.612 (0.52-0.72) | *** |
|                             | Netherlands                 | 1715  | 0.889 (0.79-1.01)                               | NS  | 1.303 (1.13-1.50) | *** | 1.389 (1.15-1.68)                                    | **  | 1.657 (1.43-1.92) | *** | 1.326 (1.13-1.55)                             | *** | 1.498 (1.31-1.71) | *** | 1.307 (1.12-1.53)                                 | **  | 1.264 (1.09-1.47) | **  |
|                             | US                          | 1698  | 0.843 (0.74-0.96)                               | *   | 1.539 (1.33-1.78) | *** | 0.746 (0.89-0.95)                                    | *   | 0.686 (0.57-0.83) | *** | 1.113 (0.94-1.32)                             | NS  | 0.834 (0.72-0.97) | *   | 0.606 (0.50-0.74)                                 | *** | 0.748 (0.62-0.90) | **  |
|                             | New Zealand                 | 1360  | 0.494 (0.43-0.57)                               | *** | 0.938 (0.80-1.09) | NS  | 0.460 (0.35-0.60)                                    | *** | 1.003 (0.85-1.18) | NS  | 1.085 (0.92-1.28)                             | NS  | 1.282 (1.12-1.47) | *** | 0.878 (0.74-1.05)                                 | NS  | 1.016 (0.87-1.19) | NS  |
|                             | France                      | 1478  | 0.969 (0.85-1.11)                               | NS  | 1.633 (1.41-1.89) | *** | 0.747 (0.59-0.95)                                    | *   | 0.645 (0.53-0.78) | *** | 1.000 (0.84-1.19)                             | NS  | 0.734 (0.63-0.86) | *** | 0.941 (0.79-1.12)                                 | NS  | 0.829 (0.70-0.99) | *   |
|                             | Australia                   | 1360  | 0.548 (0.47-0.64)                               | *** | 1.289 (1.11-1.53) | **  | 0.566 (0.42-0.76)                                    | *** | 0.614 (0.50-0.76) | *** | 0.684 (0.55-0.85)                             | *** | 0.639 (0.53-0.76) | *** | 0.747 (0.60-0.92)                                 | **  | 0.573 (0.46-0.71) | *** |
|                             | Hungary                     | 1055  | 0.399 (0.35-0.46)                               | *** | 0.719 (0.61-0.85) | *** | 0.552 (0.42-0.73)                                    | *** | 0.936 (0.78-1.12) | NS  | 0.422 (0.33-0.53)                             | *** | 0.583 (0.49-0.69) | *** | 0.501 (0.40-0.63)                                 | *** | 0.440 (0.35-0.55) | *** |
|                             | Italy                       | 1268  | 0.717 (0.60-0.85)                               | *** | 1.058 (0.87-1.29) | NS  | 0.706 (0.51-0.97)                                    | *   | 1.235 (1.00-1.53) | NS  | 0.393 (0.29-0.53)                             | *** | 0.715 (0.58-0.88) | **  | 0.847 (0.67-1.08)                                 | NS  | 1.024 (0.83-1.27) | NS  |
|                             | Spain                       | 692   | 0.526 (0.42-0.66)                               | *** | 0.814 (0.62-1.06) | NS  | 0.866 (0.60-1.26)                                    | NS  | 1.367 (1.05-1.78) | *   | 0.824 (0.61-1.12)                             | NS  | 1.067 (0.84-1.36) | NS  | 0.885 (0.65-1.20)                                 | NS  | 1.599 (1.24-2.06) | *** |
|                             | Colombia                    | 372   | 0.842 (0.72-0.98)                               | *   | 1.892 (1.60-2.23) | *** | 0.282 (0.18-0.43)                                    | *** | 0.327 (0.25-0.44) | *** | 0.380 (0.29-0.53)                             | *** | 0.307 (0.24-0.39) | *** | 0.848 (0.68-1.06)                                 | NS  | 0.571 (0.45-0.72) | *** |
|                             | Austria                     | 880   | 0.852 (0.73-1.00)                               | NS  | 2.103 (1.77-2.50) | *** | 0.475 (0.34-0.67)                                    | *** | 0.352 (0.27-0.47) | *** | 0.831 (0.67-1.04)                             | NS  | 0.556 (0.45-0.68) | *** | 1.117 (0.91-1.38)                                 | NS  | 0.868 (0.70-1.07) | NS  |
|                             | Norway                      | 782   | 1.038 (0.85-1.26)                               | NS  | 1.833 (1.48-2.27) | *** | 1.232 (0.90-1.69)                                    | NS  | 1.145 (0.89-1.47) | NS  | 1.199 (0.93-1.54)                             | NS  | 1.132 (0.91-1.41) | NS  | 1.230 (0.96-1.58)                                 | NS  | 1.090 (0.85-1.39) | NS  |
|                             | Canada                      | 468   | 0.648 (0.46-0.87)                               | **  | 1.103 (0.80-1.53) | NS  | 1.236 (0.80-1.90)                                    | NS  | 1.374 (0.98-1.93) | NS  | 0.908 (0.62-1.34)                             | NS  | 0.851 (0.61-1.18) | NS  | 1.091 (0.76-1.57)                                 | NS  | 1.172 (0.83-1.65) | NS  |
|                             | Mexico                      | 210   | 0.730 (0.59-0.91)                               | **  | 1.107 (0.86-1.42) | NS  | 0.527 (0.34-0.82)                                    | **  | 0.535 (0.39-0.74) | *** | 1.157 (0.88-1.52)                             | NS  | 0.981 (0.77-1.25) | NS  | 0.902 (0.67-1.21)                                 | NS  | 0.805 (0.61-1.07) | NS  |
|                             | Belgium                     | 378   | 0.736 (0.55-0.98)                               | *   | 1.591 (1.18-2.14) | **  | 1.141 (0.72-1.78)                                    | NS  | 1.048 (0.73-1.50) | NS  | 0.719 (0.47-1.10)                             | NS  | 0.954 (0.69-1.31) | NS  | 1.149 (0.80-1.64)                                 | NS  | 1.014 (0.71-1.45) | NS  |
|                             | Brazil                      | 213   |                                                 |     |                   |     |                                                      |     |                   |     |                                               |     |                   |     |                                                   |     |                   |     |

|   |          |     |              |                  |              |           |              |           |              |          |              |  |              |  |              |  |              |
|---|----------|-----|--------------|------------------|--------------|-----------|--------------|-----------|--------------|----------|--------------|--|--------------|--|--------------|--|--------------|
| 1 |          |     | 0.98)        |                  | 2.16)        |           | 1.81)        |           | 1.51)        |          | 1.09)        |  | 1.31)        |  | 1.65)        |  | 1.45)        |
| 2 |          |     | 0.652 (0.50- |                  |              |           | 0.965 (0.60- |           | 0.573 (0.37- |          | 0.538 (0.35- |  | 0.388 (0.26- |  | 0.820 (0.56- |  | 0.513 (0.34- |
| 3 | Portugal | 237 | 0.86) **     | 0.747 (.53-1.05) | NS           | 1.55) NS  | 0.88) *      | 0.84) **  | 0.58) ***    | 1.20) NS | 0.78) **     |  |              |  |              |  |              |
| 4 |          |     | 1.131 (0.89- |                  | 2.656 (2.09- |           | 0.423 (0.25- |           | 0.344 (0.22- |          | 0.895 (0.65- |  | 0.566 (0.42- |  | 1.077 (0.78- |  | 0.905 (0.66- |
| 5 | Sweden   | 312 | 1.43) NS     | 3.38) ***        | 0.72) **     | 0.53) *** | 1.24) NS     | 0.77) *** | 1.49) NS     | 1.24) NS |              |  |              |  |              |  |              |
| 6 |          |     | 0.881 (0.67- |                  | 1.362 (1.01- |           | 0.776 (0.49- |           | 0.721 (0.50- |          | 0.784 (0.54- |  | 0.684 (0.49- |  | 0.930 (0.65- |  | 0.781 (0.55- |
| 7 | Ireland  | 230 | 1.16) NS     | 1.84) *          | 1.22) NS     | 1.03) NS  | 1.15) NS     | 0.95) *   | 1.33) NS     | 1.11) NS |              |  |              |  |              |  |              |

AOR, adjusted odds ratio; CI, confidence interval; NS, not significant.

\*p<0.05, \*\*p<0.01, \*\*\*p<0.001.

<sup>†</sup>Country variable was included in the logistic regression model for Table 5 and has been included in separate supplementary table due to space restrictions.

<sup>‡</sup>Emotions from drinking respondents reported regardless of the type of alcohol they associate it with. Includes emotions associated with spirits, white wine, red wine and beer.

<sup>§</sup>Respondents reported which drink type they mostly drank when at home and when out.

<sup>¶</sup>Reference category

For peer review only

STROBE 2007 (v4) Statement—Checklist of items that should be included in reports of *cross-sectional studies*

| Section/Topic                | Item # | Recommendation                                                                                                                                                                       | Reported on page # |
|------------------------------|--------|--------------------------------------------------------------------------------------------------------------------------------------------------------------------------------------|--------------------|
| Title and abstract           | 1      | (a) Indicate the study's design with a commonly used term in the title or the abstract                                                                                               | 1                  |
|                              |        | (b) Provide in the abstract an informative and balanced summary of what was done and what was found                                                                                  | 2                  |
| <b>Introduction</b>          |        |                                                                                                                                                                                      |                    |
| Background/rationale         | 2      | Explain the scientific background and rationale for the investigation being reported                                                                                                 | 4                  |
| Objectives                   | 3      | State specific objectives, including any prespecified hypotheses                                                                                                                     | 4                  |
| <b>Methods</b>               |        |                                                                                                                                                                                      |                    |
| Study design                 | 4      | Present key elements of study design early in the paper                                                                                                                              | 5                  |
| Setting                      | 5      | Describe the setting, locations, and relevant dates, including periods of recruitment, exposure, follow-up, and data collection                                                      | 5                  |
| Participants                 | 6      | (a) Give the eligibility criteria, and the sources and methods of selection of participants                                                                                          | 5                  |
| Variables                    | 7      | Clearly define all outcomes, exposures, predictors, potential confounders, and effect modifiers. Give diagnostic criteria, if applicable                                             | 5                  |
| Data sources/<br>measurement | 8*     | For each variable of interest, give sources of data and details of methods of assessment (measurement). Describe comparability of assessment methods if there is more than one group | 5/6                |
| Bias                         | 9      | Describe any efforts to address potential sources of bias                                                                                                                            | 6                  |
| Study size                   | 10     | Explain how the study size was arrived at                                                                                                                                            | 5/6                |
| Quantitative variables       | 11     | Explain how quantitative variables were handled in the analyses. If applicable, describe which groupings were chosen and why                                                         | 6                  |
| Statistical methods          | 12     | (a) Describe all statistical methods, including those used to control for confounding                                                                                                | 6                  |
|                              |        | (b) Describe any methods used to examine subgroups and interactions                                                                                                                  | 6                  |
|                              |        | (c) Explain how missing data were addressed                                                                                                                                          | 5/6                |
|                              |        | (d) If applicable, describe analytical methods taking account of sampling strategy                                                                                                   | NA                 |
|                              |        | (e) Describe any sensitivity analyses                                                                                                                                                | NA                 |
| <b>Results</b>               |        |                                                                                                                                                                                      |                    |

|                          |     |                                                                                                                                                                                                              |                         |
|--------------------------|-----|--------------------------------------------------------------------------------------------------------------------------------------------------------------------------------------------------------------|-------------------------|
| Participants             | 13* | (a) Report numbers of individuals at each stage of study—eg numbers potentially eligible, examined for eligibility, confirmed eligible, included in the study, completing follow-up, and analysed            | 5                       |
|                          |     | (b) Give reasons for non-participation at each stage                                                                                                                                                         | NA                      |
|                          |     | (c) Consider use of a flow diagram                                                                                                                                                                           | NA                      |
| Descriptive data         | 14* | (a) Give characteristics of study participants (eg demographic, clinical, social) and information on exposures and potential confounders                                                                     | 5/Supplementary Table A |
|                          |     | (b) Indicate number of participants with missing data for each variable of interest                                                                                                                          | 5                       |
| Outcome data             | 15* | Report numbers of outcome events or summary measures                                                                                                                                                         | NA                      |
| Main results             | 16  | (a) Give unadjusted estimates and, if applicable, confounder-adjusted estimates and their precision (eg, 95% confidence interval). Make clear which confounders were adjusted for and why they were included | 6-17                    |
|                          |     | (b) Report category boundaries when continuous variables were categorized                                                                                                                                    | 6-17                    |
|                          |     | (c) If relevant, consider translating estimates of relative risk into absolute risk for a meaningful time period                                                                                             | NA                      |
| Other analyses           | 17  | Report other analyses done—eg analyses of subgroups and interactions, and sensitivity analyses                                                                                                               | 6-17                    |
| <b>Discussion</b>        |     |                                                                                                                                                                                                              |                         |
| Key results              | 18  | Summarise key results with reference to study objectives                                                                                                                                                     | 18                      |
| Limitations              | 19  | Discuss limitations of the study, taking into account sources of potential bias or imprecision. Discuss both direction and magnitude of any potential bias                                                   | 19                      |
| Interpretation           | 20  | Give a cautious overall interpretation of results considering objectives, limitations, multiplicity of analyses, results from similar studies, and other relevant evidence                                   | 18/19                   |
| Generalisability         | 21  | Discuss the generalisability (external validity) of the study results                                                                                                                                        | 18/19                   |
| <b>Other information</b> |     |                                                                                                                                                                                                              |                         |
| Funding                  | 22  | Give the source of funding and the role of the funders for the present study and, if applicable, for the original study on which the present article is based                                                | 3                       |

\*Give information separately for cases and controls in case-control studies and, if applicable, for exposed and unexposed groups in cohort and cross-sectional studies.

**Note:** An Explanation and Elaboration article discusses each checklist item and gives methodological background and published examples of transparent reporting. The STROBE checklist is best used in conjunction with this article (freely available on the Web sites of PLoS Medicine at <http://www.plosmedicine.org/>, Annals of Internal Medicine at <http://www.annals.org/>, and Epidemiology at <http://www.epidem.com/>). Information on the STROBE Initiative is available at [www.strobe-statement.org](http://www.strobe-statement.org).

# BMJ Open

**Do emotions related to alcohol consumption differ by alcohol type? An international cross-sectional survey of emotions associated with alcohol consumption and influence on drink choice in different settings.**

|                                 |                                                                                                                                                                                                                                                                                                                                                                                                                                                                                         |
|---------------------------------|-----------------------------------------------------------------------------------------------------------------------------------------------------------------------------------------------------------------------------------------------------------------------------------------------------------------------------------------------------------------------------------------------------------------------------------------------------------------------------------------|
| Journal:                        | <i>BMJ Open</i>                                                                                                                                                                                                                                                                                                                                                                                                                                                                         |
| Manuscript ID                   | bmjopen-2017-016089.R1                                                                                                                                                                                                                                                                                                                                                                                                                                                                  |
| Article Type:                   | Research                                                                                                                                                                                                                                                                                                                                                                                                                                                                                |
| Date Submitted by the Author:   | 26-Jun-2017                                                                                                                                                                                                                                                                                                                                                                                                                                                                             |
| Complete List of Authors:       | Ashton, Kathryn; Public Health Wales, Policy, Research and International Development<br>Bellis, Mark; Bangor University, College of Health and Behavioural Sciences; Public Health Wales, Policy, Research and International Development<br>Davies, Alisha; Public Health Wales, Policy, Research and International Development<br>Hughes, Karen; Public Health Wales, Policy, Research and International Development<br>Winstock, Adam; King's College London, Institute of Psychiatry |
| <b>Primary Subject Heading</b>: | Public health                                                                                                                                                                                                                                                                                                                                                                                                                                                                           |
| Secondary Subject Heading:      | Addiction, Public health                                                                                                                                                                                                                                                                                                                                                                                                                                                                |
| Keywords:                       | Substance misuse < PSYCHIATRY, PUBLIC HEALTH, Depression & mood disorders < PSYCHIATRY                                                                                                                                                                                                                                                                                                                                                                                                  |
|                                 |                                                                                                                                                                                                                                                                                                                                                                                                                                                                                         |

SCHOLARONE™  
Manuscripts

1  
2  
3  
4  
5  
6  
7  
8  
9  
10 **Manuscript Title:** Do emotions related to alcohol consumption differ by alcohol type? An  
11 international cross-sectional survey of emotions associated with alcohol consumption and  
12 influence on drink choice in different settings.  
13

14  
15  
16 **Authors:** Kathryn Ashton<sup>1</sup>, Mark A Bellis<sup>1</sup>, Alisha R Davies<sup>1</sup>, Karen Hughes<sup>1</sup> and Adam Winstock<sup>2</sup>  
17  
18

19  
20 <sup>1</sup>Public Health Wales NHS Trust, Floor 5 Capital Quarter 2, Tyndall Street, Cardiff, UK, CF10 4BZ.

21 <sup>2</sup> Institute of Psychiatry, Psychiatry and Neuroscience, King's College London, Addiction Sciences Building, 4  
22 Windsor Walk, Denmark Hill, London, UK, SE5 8BB.  
23

24  
25  
26 **Corresponding author:** Mrs Kathryn Ashton, [kathryn.ashton@yahoo.co.uk](mailto:kathryn.ashton@yahoo.co.uk), 02920 104460.  
27  
28

29  
30 **Word count:** 3664  
31  
32  
33  
34  
35  
36  
37  
38  
39  
40  
41  
42  
43  
44  
45  
46  
47  
48  
49  
50  
51  
52  
53  
54  
55  
56  
57  
58  
59  
60

## ABSTRACT

### Objectives

To examine the emotions associated with drinking different types of alcohol, explore whether these emotions differ by socio-demographics and alcohol dependency and whether the emotions associated with different drink types influence people's choice of drinks in different settings.

### Design

International cross-sectional opportunistic survey (Global Drug Survey) using an online anonymous questionnaire in 11 languages promoted through newspapers, magazines and social media from November 2015-January 2016.

### Study Population

Individuals aged 18-34 years who reported consumption of beer, spirits, red and white wine in the previous 12 months and were resident in countries with more than 200 respondents (n= 21 countries; 29,836 respondents).

### Main outcome measures

Positive and negative emotions associated with consumption of different alcoholic beverages (energised, relaxed, sexy, confident, tired, aggressive, ill, restless and tearful) over the past 12 months in different settings.

### Results

Alcoholic beverages vary in the types of emotions individuals report they elicit, with spirits more frequently eliciting emotional changes of all types. Overall 29.8% of respondents reported feeling aggressive when drinking spirits, compared to only 7.1% when drinking red wine ( $p<0.001$ ). Women more frequently reported feeling all emotions when drinking alcohol, apart from feelings of aggression. Respondents' level of alcohol dependency was strongly associated with feeling all emotions, with the likelihood of aggression being significantly higher in possible dependent versus low risk drinkers (AOR 6.4; 95%CI 5.79-7.09;  $p<0.001$ ). The odds of feeling the majority of positive and negative emotions also remained highest amongst dependent drinkers irrespective of setting.

### Conclusion

Understanding emotions associated with alcohol consumption is imperative to addressing alcohol misuse, providing insight into what emotions influence drink choice between different groups in the population. The differences identified between socio-demographic groups and influences on drink choice within different settings will aid future public health practice to further comprehend individuals' drinking patterns and influence behaviour change.



## ARTICLE SUMMARY

### Strengths and limitations of this study

- The Global Drug Survey is a well-established international survey that allows analysis of both drug and alcohol use.
- Using online methods in multiple languages, the Global Drug Survey 2016 included unique questions on alcohol consumption and emotions related to consuming different types of alcohol.
- All respondents within the sample used for this study drank all types of alcohol included in the analysis.
- Although the sample size for the study is large, the sample is opportunistic and non-probability samples cannot be considered representative of more general population groups.
- Analysis makes the assumption that alcohol consumption behaviours are based on rational choice, which may not always be the case due to confounding factors such as the influence of alcohol on recollection.

### Funding statement

This research received no specific grant from any funding agency in the public, commercial or not-for-profit sectors. The Global Drug Survey is a independent self-funded survey.

### No competing interests

We have read and understood BMJ policy on declaration of interests and declare that we have no competing interests.

### Ethics

Ethical approval for the Global Drug Survey 2016 was obtained from the Psychiatry, Nursing and Midwives Ethics Subcommittee at Kings College London.

### License statement

The Corresponding Author has the right to grant on behalf of all authors and does grant on behalf of all authors, a worldwide licence to the Publishers and its licensees in perpetuity, in all forms, formats and media (whether known now or created in the future), to i) publish, reproduce, distribute, display and store the Contribution, ii) translate the Contribution into other languages, create adaptations, reprints, include within collections and create summaries, extracts and/or, abstracts of the Contribution, iii) create any other derivative work(s) based on the Contribution, iv) to exploit all subsidiary rights in the Contribution, v) the inclusion of electronic links from the Contribution to third party material where-ever it may be located; and, vi) licence any third party to do any or all of the above.

## INTRODUCTION

Alcohol use is of international public health concern with approximately 3.3 million deaths and 5.1% of the global burden of disease and injury attributable to alcohol consumption in 2014.[1] In addition, there is a growing body of evidence illustrating the harms caused by those who drink alcohol to individuals around them and to wider communities (for example, through alcohol related violence and anti-social behaviour).[2-4] Understanding why people choose particular drink types and whether different drinks elicit different emotions may help inform more effective public health interventions.

Alcohol consumption has a long-standing association with mood, with evidence showing that people consume alcohol to help regulate emotional experiences, reduce negative emotions and enhance positive emotions.[5-6] A substantial body of research exists which outlines drinking motives, defined as the gateway to the decision to consume alcohol, and makes the assumption that people drink in order to achieve a particular goal.[7-9] Social motives have been associated with moderate alcohol use; enhancement motives (for example, increasing levels of confidence) with heavy drinking; and coping motives with alcohol-related problems.[7] Evidence also outlines how expectancies about the perceived consequences of drinking alcohol affects whether people start to drink, become regular drinkers or become dependent on alcohol.[10]

Historically, alcohol's perceived capacity to temporarily reduce negative emotions (and consequently increase pleasure and relaxation) has been regarded as the primary reason for consumption.[11] Individuals across the United States, Canada and Sweden have previously reported associating generally positive emotions with alcohol consumption, emphasising feelings of relaxation, and reporting alcohol as an antidote to fatigue and contributing to increasing the values of sociability.[12] Social mood enhancement has also been found to be the most highly endorsed reason for drinking, with alcohol consumption being strongly associated with short term increases in self-reported positive mood, decreases in negative mood and increases in levels of social bonding.[13] However, although alcohol may initially induce stimulation, consumption has also been associated with triggering negative emotions, such as aggression and depression[14-16] and can lead to out-of-character actions being undertaken by the drinker and exacerbate pre-morbid personality traits.[17]

Outside cultural myth and folklore, little attention has been paid to the immediate emotions associated with drinking different types of alcohol. Potential differences in the emotional consequences (both positive and negative) of drinking different types of alcohol (for example spirits vs. beer) and how emotional expectations from past experiences of different alcohol types influence drink choice remain relatively unexplored areas. However, measures that look to change drinking behaviour and consequently reduce alcohol related harms could benefit from a better understanding of how different drink types are associated with diverse social and emotional outcomes and how such relationships vary with demographics and drinking situation (for example, whether drinking at home or when out). In this study, we used the internationally established Global Drug Survey (GDS) to identify which drink types are associated with different emotional outcomes in alcohol consumers from 21 countries and how both demographic factors and levels of dependency on alcohol affect such relationships. Finally, we explored whether emotions that

respondents associate with different drink types influence their choices of drinks in different settings.

## METHODS

### Data source

The GDS is the world's biggest drug survey. Using encrypted online survey methods, the GDS is implemented as an annual, opportunistic, self-reported, cross sectional survey of alcohol and drug use amongst adults over the age of 16 years.[18] The GDS 2016 was launched online in November 2015 in 11 languages (English, German, Greek, Polish, French, Italian, Spanish, Portuguese, Flemish, Hungarian and Danish) and promoted internationally through national media (newspapers, magazines and social media networks). While the GDS non-probability methodology does not allow for the assessment of general population prevalence, the GDS sample enables examination of drug and alcohol behaviours and perceptions across age groups, gender, sexual preferences, place of residence, or mental health status within the sample. GDS can efficiently add nuance and add depth to the findings of more representative surveys, which are often less detailed and based on smaller samples. The GDS has previously been used to examine both alcohol and drug use, for example exploring the risk of emergency admission after drug use, trends in self-reported drug use such as nitrous oxide and examining harm to others from alcohol consumption.[4, 19-20] Whilst it was not designed to create supra-national or nationally representative population estimates it does provides access to a large sample of self-selected individuals. Other publications provide full details of other aspects of the utility, design and limitations of the GDS.[4, 19]

### Variables

Socio-demographic data were collected on age, sex, country of residence and educational attainment (here categorised into either not attended high school, or attended high school) as a proxy for socio-economic status. The GDS also collects data on the consumption of both legal and illegal drug use and alcohol use.[18] Analyses within this study focus on individual alcohol use and utilise a range of questions that asked respondents to self-report what type of alcoholic drink(s) they consume and which different emotions they associated with each alcohol type. Emotions included were both positive (energised, relaxed, sexy and confident) and negative (tired, aggressive, ill, restless and tearful). Data were also collected on what types of alcohol were most likely to be drunk at home or when out and levels of consumption for each participant using the Alcohol Use Disorders Test (AUDIT) were also calculated.[21]

### Study population

In total, 87,925 respondents completed the survey and had reported drinking alcohol in the last 12 months. However, in order to strengthen the robustness of the effect estimates the dataset for analyses was restricted to respondents who had reported their sex, were resident in a country which contributed at least 200 responses to the overall survey and were aged 18-34 years old. In total, 4,271 cases were excluded due to low country response and 23,076 were excluded as they were out of the desired age range leaving a sample of 60,578. All respondents to the survey reported their gender. For the purposes of examining emotional relationships with different alcohol types only

1  
2  
3 individuals who had consumed all alcohol types of interest (i.e. spirits, red wine, white wine and  
4 beer) at some point in the last 12 months and had indicated one of these as their main drink when at  
5 home and when outside of the home were included. Although some respondents reported drinking  
6 other beverages, for example cider, the numbers were too small for inclusion in the analysis. This  
7 resulted in a final sample size of 29,836. Full details of sample demographics used in the analysis are  
8 outlined in Supplementary Table A.  
9  
10

### 11 **Statistical methods**

12  
13 To identify and quantify the strength of association between variables used in the analysis, chi  
14 squared, Cochran's Q, McNemar's test and logistic regression modelling were undertaken in SPSS  
15 (V.23). Demographics included in analyses were age (categorised as 18-24, 25-29 and 30-34 years),  
16 sex, country of residence, educational attainment and levels of dependency on alcohol (based on the  
17 AUDIT questionnaire score). Respondents were classified into the following dependency categories:  
18 0-7, low risk; 8-15, increasing risk; 16-19, higher risk; 20+, possible dependence.[21] The emotions  
19 associated with drinking individual types of alcohol were analysed and the emotions individuals  
20 experience regardless of the drink they associated the emotion with were combined to create a set  
21 of variables which describe the emotions associated with drinking any of the different types of  
22 alcohol (spirits, white wine, red wine or spirits). In addition, to analyse how emotions related to  
23 drink choice in different settings, the responses to what drinks were reported to be mostly  
24 consumed in different settings and the emotions which people reported with those particular drink  
25 types were linked.  
26  
27  
28  
29

### 30 **RESULTS**

31  
32 Results indicated that respondents attributed different emotions to drinking different types of  
33 alcohol (Table 1). Over half of all respondents associated drinking spirits with emotions of energy  
34 and confidence and 42.4% reported that drinking spirits made them feel sexy. Respondents were  
35 most likely to report feeling relaxed (52.8%) when drinking red wine; although almost half of  
36 respondents also reported feeling relaxed when drinking beer (Table 1). Drinking spirits was more  
37 likely to draw out feelings of aggression, illness, restlessness and tearfulness than all other drink  
38 types (Table 1). However, red wine was the most likely to make individuals feel tired (60.1%, Table  
39 1).  
40  
41  
42  
43  
44  
45  
46  
47  
48  
49  
50  
51  
52  
53  
54  
55  
56  
57  
58  
59  
60

1  
2  
3  
4  
5  
6  
7  
8  
9  
10  
11  
12  
13  
14  
15  
16  
17  
18  
19  
20  
21  
22  
23  
24  
25  
26  
27  
28  
29  
30  
31  
32  
33  
34  
35  
36  
37  
38  
39  
40  
41  
42  
43  
44  
45  
46  
47  
48  
49

Table 1: Overall reported emotions by individual type of alcoholic drink (%)

|                          |            | n     | Drink type |             |          |             |            |             |       |             | Cochran's |        |
|--------------------------|------------|-------|------------|-------------|----------|-------------|------------|-------------|-------|-------------|-----------|--------|
|                          |            |       | Spirits    | 95%CI       | Red wine | 95%CI       | White wine | 95%CI       | Beer  | 95%CI       | Q         | P      |
| <b>Positive emotions</b> | Energised  | 29836 | 58.36      | 57.80-58.92 | 7.14     | 6.84-7.43   | 15.07      | 14.66-15.47 | 24.76 | 24.27-25.24 | 23610.470 | <0.001 |
|                          | Confident  | 29836 | 59.08      | 58.52-59.63 | 27.88    | 27.37-28.39 | 28.27      | 27.76-28.78 | 44.54 | 43.97-45.10 | 11885.08  | <0.001 |
|                          | Relaxed    | 29836 | 20.15      | 19.70-20.61 | 52.80    | 52.23-53.37 | 32.67      | 32.14-33.20 | 49.87 | 49.30-50.43 | 9578.230  | <0.001 |
|                          | Sexy       | 29836 | 42.42      | 41.85-42.98 | 25.20    | 24.71-25.70 | 23.73      | 23.24-24.21 | 18.86 | 18.41-19.31 | 6261.860  | <0.001 |
| <b>Negative emotions</b> | Tired      | 29836 | 15.33      | 14.92-15.74 | 60.08    | 59.52-60.63 | 18.44      | 18.00-18.88 | 38.92 | 38.36-39.47 | 17024.29  | <0.001 |
|                          | Aggressive | 29836 | 29.83      | 29.31-30.35 | 2.57     | 2.39-2.75   | 2.74       | 2.55-2.92   | 6.73  | 6.44-7.01   | 17467.32  | <0.001 |
|                          | Ill        | 29836 | 47.82      | 47.26-48.39 | 19.29    | 18.84-19.74 | 14.50      | 14.10-14.90 | 16.71 | 16.28-17.13 | 13032.62  | <0.001 |
|                          | Restless   | 29836 | 27.81      | 27.30-28.32 | 5.18     | 4.93-5.43   | 6.43       | 6.15-6.71   | 9.34  | 9.01-9.67   | 11329.91  | <0.001 |
|                          | Tearful    | 29836 | 22.24      | 21.77-22.71 | 17.10    | 16.67-17.52 | 9.96       | 9.62-10.30  | 9.88  | 9.54-10.22  | 3551.28   | <0.001 |

Review only

### Emotional associations with drinking any type of alcohol (spirits, white wine, red wine and beer)

Differences in emotions reported by respondents when drinking alcohol of any type (inclusive of spirits, white wine, red wine and beer) were examined for socio-demographic groups. With the exception of feeling aggressive, females were significantly more likely than males to report each emotion as a result of drinking any type of alcohol (Table 2). Younger age groups (18-24 years) most frequently reported most emotion types when drinking alcohol. Exceptions were aggression and tiredness where there was no significant association with age (Table 2). Respondents' alcohol consumption (AUDIT score) was strongly associated with both positive and negative emotions, with heavier drinkers more likely to report all emotional changes as a result of drinking. This relationship was especially strong for the emotions of aggression, whereas the increase in tiredness was negligible (Table 2). A greater proportion of those with lower educational attainment reported both positive (energised, sexy or confident) and negative (aggressive, ill or tearful) emotions when drinking alcohol compared with those who had attended high school (Table 2). Bivariate associations between emotions and both alcohol dependence level and demographics remained significant after using logistic regression modelling to control for confounding relationships between variables (Table 3; online supplementary table B for country of residence). Thus, females had higher odds of feeling all emotions compared to males apart from aggression where males had significantly higher odds. Younger age groups had higher odds of feeling all emotions apart from tiredness and aggression. Odds of reporting all emotions except tiredness increased with AUDIT score category, in particular feelings of aggression (Table 3). Differences in emotions were also reported by respondents from different countries with the highest association with the positive emotions of feeling energised, relaxed and sexy being the South American sample of Colombia and Brazil. For negative emotions, the country sample with the strongest association with aggression when drinking alcohol was Norway and for feeling restless was France (online supplementary table B). However, caution must be taken when interpreting these results due to the small sample for each country.

Table 2: Bivariate relationship between emotions associated with drinking any type of alcohol<sup>¶</sup> and AUDIT score and socio-demographics (%)

|                             |                        | Emotions associated with drinking any type of alcohol <sup>¶</sup> |                   |         |         |           |                   |            |         |          |          |
|-----------------------------|------------------------|--------------------------------------------------------------------|-------------------|---------|---------|-----------|-------------------|------------|---------|----------|----------|
|                             |                        | n                                                                  | Positive emotions |         |         |           | Negative emotions |            |         |          |          |
|                             |                        |                                                                    | Energised         | Relaxed | Sexy    | Confident | Tired             | Aggressive | Ill     | Restless | Tearful  |
| <b>AUDIT</b>                | Lower risk (0-7)       | 10577                                                              | 61.11             | 83.32   | 51.74   | 65.78     | 85.07             | 20.28      | 62.33   | 29.25    | 26.78    |
|                             | Increasing risk (8-15) | 14205                                                              | 79.25             | 90.55   | 65.91   | 80.76     | 87.83             | 38.24      | 72.22   | 39.63    | 39.87    |
|                             | Higher risk (16-19)    | 2895                                                               | 86.60             | 93.16   | 73.92   | 87.63     | 89.50             | 52.71      | 79.24   | 48.70    | 50.78    |
|                             | Dependence (20+)       | 2159                                                               | 90.13             | 93.61   | 73.83   | 89.95     | 88.42             | 63.08      | 80.64   | 55.16    | 59.70    |
|                             | $\chi^2$               |                                                                    | 1659.410          | 452.744 | 868.464 | 1244.958  | 63.389            | 2218.420   | 563.548 | 770.746  | 1220.481 |
|                             | p                      |                                                                    | ***               | ***     | ***     | ***       | ***               | ***        | ***     | ***      | ***      |
| <b>Sex</b>                  | Male                   | 19934                                                              | 73.01             | 88.06   | 57.17   | 75.88     | 85.45             | 36.97      | 67.45   | 36.98    | 32.27    |
|                             | Female                 | 9902                                                               | 76.96             | 89.28   | 72.43   | 78.61     | 90.29             | 31.27      | 75.16   | 39.92    | 48.71    |
|                             | $\chi^2$               |                                                                    | 54.179            | 9.635   | 655.165 | 27.760    | 137.980           | 94.407     | 187.240 | 24.269   | 761.188  |
|                             | p                      |                                                                    | ***               | **      | ***     | ***       | ***               | ***        | ***     | ***      | ***      |
| <b>Age (years)</b>          | 18-24                  | 16333                                                              | 79.30             | 89.19   | 67.03   | 81.36     | 86.97             | 35.39      | 72.32   | 40.06    | 40.38    |
|                             | 25-29                  | 8744                                                               | 70.53             | 87.98   | 59.00   | 73.28     | 87.64             | 35.16      | 68.57   | 36.76    | 35.94    |
|                             | 30-34                  | 4759                                                               | 64.22             | 86.85   | 51.73   | 67.49     | 86.28             | 33.83      | 64.70   | 32.95    | 31.88    |
|                             | $\chi^2$               |                                                                    | 532.72            | 22.585  | 422.007 | 482.601   | 5.278             | 3.993      | 114.045 | 86.724   | 130.036  |
|                             | p                      |                                                                    | ***               | ***     | ***     | ***       | NS                | NS         | ***     | ***      | ***      |
| <b>Attended high school</b> | Yes                    | 29365                                                              | 74.17             | 88.42   | 62.13   | 76.64     | 87.05             | 34.95      | 69.85   | 37.91    | 37.61    |
|                             | No                     | 471                                                                | 84.08             | 91.08   | 68.79   | 85.99     | 87.26             | 43.10      | 79.62   | 41.19    | 45.01    |
|                             | $\chi^2$               |                                                                    | 23.855            | 3.224   | 8.743   | 22.742    | 0.0180            | 13.5330    | 21.0560 | 2.1220   | 10.8190  |
|                             | p                      |                                                                    | ***               | NS      | **      | ***       | NS                | ***        | ***     | NS       | ***      |

AUDIT, alcohol use disorders identification test; NS, not significant.

\*p&lt;0.05, \*\*p&lt;0.01, \*\*\*p&lt;0.001.

<sup>¶</sup>Emotions from drinking respondents reported regardless of the type of alcohol they associate it with. Includes emotions associated with drinking spirits, white wine, red wine and beer.

Table 3: Logistic regression model<sup>†</sup> for AUDIT score and socio-demographic relationships with emotions associated with drinking any type of alcohol<sup>†</sup>

|                             |                               |       | Emotions associated with drinking any type of alcohol <sup>†</sup> |     |             |     |             |     |             |     |
|-----------------------------|-------------------------------|-------|--------------------------------------------------------------------|-----|-------------|-----|-------------|-----|-------------|-----|
|                             |                               |       | Positive emotions                                                  |     |             |     |             |     |             |     |
|                             |                               |       | Energised                                                          |     | Relaxed     |     | Sexy        |     | Confident   |     |
| n                           |                               |       | AOR                                                                | p   | AOR         | p   | AOR         | p   | AOR         | p   |
|                             |                               |       | (95% CI)                                                           |     | (95% CI)    |     | (95% CI)    |     | (95% CI)    |     |
| <b>AUDIT</b>                | Lower risk (0-7) <sup>‡</sup> | 10577 |                                                                    |     |             |     |             |     |             |     |
|                             | Increasing risk (8-15)        | 14205 | 2.28                                                               | *** | 1.86        | *** | 1.83        | *** | 2.03        | *** |
|                             |                               |       | (2.15-2.42)                                                        |     | (1.73-2.02) |     | (1.73-1.93) |     | (1.92-2.16) |     |
|                             | Higher risk (16-19)           | 2895  | 3.51                                                               | *** | 2.55        | *** | 2.64        | *** | 3.18        | *** |
|                             |                               |       | (3.12-3.94)                                                        |     | (2.19-2.98) |     | (2.40-2.90) |     | (2.82-3.59) |     |
|                             | Dependence (20+)              | 2159  | 4.73                                                               | *** | 2.66        | *** | 2.58        | *** | 3.86        | *** |
|                             |                               |       | (4.07-5.50)                                                        |     | (2.21-3.19) |     | (2.32-2.87) |     | (3.33-4.48) |     |
| <b>Sex</b>                  | Female <sup>‡</sup>           | 9902  |                                                                    |     |             |     |             |     |             |     |
|                             | Male                          | 19934 | 0.73                                                               | *** | 0.86        | *** | 0.48        | *** | 0.82        | *** |
|                             |                               |       | (0.69-0.78)                                                        |     | (0.80-0.93) |     | (0.45-0.50) |     | (0.77-0.87) |     |
| <b>Age (years)</b>          | 18-24 <sup>‡</sup>            | 16333 |                                                                    |     |             |     |             |     |             |     |
|                             | 25-29                         | 8744  | 0.70                                                               | *** | 0.96        | NS  | 0.77        | *** | 0.69        | *** |
|                             |                               |       | (0.65-0.74)                                                        |     | (0.88-1.04) |     | (0.73-0.82) |     | (0.65-0.74) |     |
|                             | 30-34                         | 4759  | 0.52                                                               | *** | 0.90        | *   | 0.61        | *** | 0.53        | *** |
|                             |                               |       | (0.48-0.56)                                                        |     | (0.81-1.00) |     | (0.57-0.65) |     | (0.49-0.57) |     |
| <b>Attended high school</b> | No <sup>‡</sup>               | 471   |                                                                    |     |             |     |             |     |             |     |
|                             | Yes                           | 29365 | 0.86                                                               | NS  | 1.08        | NS  | 0.97        | NS  | 0.78        | NS  |
|                             |                               |       | (0.66-1.11)                                                        |     | (0.78-1.50) |     | (0.79-1.20) |     | (0.60-1.03) |     |



|                             |                               | Negative emotions |             |            |             |     |             |          |             |         |             |     |
|-----------------------------|-------------------------------|-------------------|-------------|------------|-------------|-----|-------------|----------|-------------|---------|-------------|-----|
|                             |                               | Tired             |             | Aggressive |             | Ill |             | Restless |             | Tearful |             |     |
|                             |                               | n                 | AOR         | p          | AOR         | p   | AOR         | p        | AOR         | p       | AOR         | p   |
|                             |                               |                   | (95% CI)    |            | (95% CI)    |     | (95% CI)    |          | (95% CI)    |         | (95% CI)    |     |
| <b>AUDIT</b>                | Lower risk (0-7) <sup>‡</sup> | 10577             | 1.35        | ***        | 2.40        | *** | 1.40        | ***      | 1.55        | ***     | 1.90        | *** |
|                             | Increasing risk (8-15)        | 14205             | (1.25-1.45) |            | (2.27-2.55) |     | (1.33-1.49) |          | (1.47-1.64) |         | (1.79-2.01) |     |
|                             |                               |                   | 1.64        | ***        | 4.26        | *** | 1.83        | ***      | 2.18        | ***     | 2.96        | *** |
|                             | Higher risk (16-19)           | 2895              | (1.43-1.87) |            | (3.90-4.66) |     | (1.65-2.03) |          | (2.00-2.38) |         | (2.71-3.23) |     |
|                             | Dependence (20+)              | 2159              | 1.49        | ***        | 6.41        | *** | 1.82        | ***      | 2.81        | ***     | 4.25        | *** |
|                             |                               |                   | (1.28-1.72) |            | (5.79-7.09) |     | (1.35-2.03) |          | (2.55-3.10) |         | (3.84-4.70) |     |
| <b>Sex</b>                  | Female <sup>‡</sup>           | 9902              | 0.63        | ***        | 1.18        | *** | 0.66        | ***      | 0.84        | ***     | 0.45        | *** |
|                             | Male                          | 19934             | (0.58-0.68) |            | (1.12-1.24) |     | (0.62-0.70) |          | (0.80-0.88) |         | (0.43-0.48) |     |
| <b>Age (years)</b>          | 18-24 <sup>‡</sup>            | 16333             | 1.10        | *          | 1.11        | *** | 0.96        | ***      | 0.92        | **      | 0.90        | *** |
|                             | 25-29                         | 8744              | (1.01-1.19) |            | (1.04-1.17) |     | (0.91-1.02) |          | (0.87-0.97) |         | (0.85-0.95) |     |
|                             |                               |                   | 1.04        | NS         | 1.09        | *** | 0.80        | ***      | 0.79        | ***     | 0.82        | *** |
|                             | 30-34                         | 4759              | (0.94-1.14) |            | (1.01-1.17) |     | (0.74-0.86) |          | (0.74-0.85) |         | (0.76-0.88) |     |
| <b>Attended high school</b> | No <sup>‡</sup>               | 471               | 1.12        | NS         | 0.91        | NS  | 0.86        | NS       | 1.05        | NS      | 0.8329      | NS  |
|                             | Yes                           | 29365             | (0.85-1.48) |            | (0.74-1.10) |     | (0.68-1.10) |          | (0.87-1.28) |         | (0.68-1.01) |     |

AUDIT, alcohol use disorders identification test; AOR, adjusted odds ratio; CI, confidence interval; NS, not significant.

\*p<0.05, \*\*p<0.01, \*\*\*p<0.001.

<sup>¶</sup>Country of residence was also included in the logistic regression model. See online Supplementary Table B.

<sup>†</sup>Emotions from drinking respondents reported regardless of the type of alcohol they associate it with. Includes emotions associated with drinking spirits, white wine, red wine and beer.

<sup>‡</sup>reference category.

### Emotional associations by individual drink type

1  
2 For each individual drink type, positive emotions were more frequently reported by those with higher alcohol  
3 dependency scores. This was also true of negative emotions, with the exception of feeling tired when drinking spirits  
4 or white wine. Females were more likely to report each emotion when drinking spirits, red wine and white wine,  
5 with the exceptions of feeling relaxed, tired or aggressive with spirits, and energised with red wine. Males were  
6 more likely to report each emotion when drinking beer, apart from feeling tearful (Table 4).  
7  
8

9 Emotions reported with each alcohol type varied by age group. For example, feeling tired or relaxed when drinking  
10 spirits and red wine were more frequently reported by the youngest age group, whereas for white wine and beer  
11 these emotions were more frequently reported by the oldest age group. In addition, emotions associated with each  
12 drink type were more frequently reported by respondents who had not attended high school or higher education,  
13 with the exception of feeling sexy, ill or restless when drinking spirits, relaxed or tired when drinking red wine and  
14 energised or relaxed when drinking beer. Italian residents more frequently reported feeling energised whilst drinking  
15 red wine and those from Colombia were more likely to report feeling energised when drinking spirits (Online  
16 supplementary tables C and D).  
17  
18  
19  
20  
21  
22  
23  
24  
25  
26  
27  
28  
29  
30  
31  
32  
33  
34  
35  
36  
37  
38  
39  
40  
41  
42  
43  
44  
45  
46  
47  
48  
49  
50  
51  
52  
53  
54  
55  
56  
57  
58  
59  
60

**Table 4: Logistic regression models<sup>†</sup> for AUDIT score and socio-demographic relationships with emotions associated with drinking an individual type of alcohol**

|                          |                        | Positive emotions |     |                 |     |                 |     |                 |     | Negative emotions |     |                 |     |                 |     |                 |     |                 |     |
|--------------------------|------------------------|-------------------|-----|-----------------|-----|-----------------|-----|-----------------|-----|-------------------|-----|-----------------|-----|-----------------|-----|-----------------|-----|-----------------|-----|
|                          |                        | Energised         |     | Relaxed         |     | Sexy            |     | Confident       |     | Tired             |     | Aggressive      |     | Ill             |     | Restless        |     | Tearful         |     |
|                          |                        | AOR               | p   | AOR             | p   | AOR             | p   | AOR             | p   | AOR               | p   | AOR             | p   | AOR             | p   | AOR             | p   | AOR             | p   |
|                          |                        | (95% CI)          |     | (95% CI)        |     | (95% CI)        |     | (95% CI)        |     | (95% CI)          |     | (95% CI)        |     | (95% CI)        |     | (95% CI)        |     | (95% CI)        |     |
| <b>Spirits</b>           |                        |                   |     |                 |     |                 |     |                 |     |                   |     |                 |     |                 |     |                 |     |                 |     |
| <b>AUDIT<sup>†</sup></b> | Increasing risk (8-15) | 1.88              | *** | 0.92            | **  | 1.60            | *** | 1.63            | *** | 0.76              | *** | 2.42            | *** | 1.20            | *** | 1.55            | *** | 1.67            | *** |
|                          |                        | (1.78-<br>.198)   |     | (0.86-<br>0.98) |     | (1.52-<br>1.69) |     | (1.55-<br>1.72) |     | (0.71-<br>0.82)   |     | (2.27-<br>2.58) |     | (1.14-<br>1.26) |     | (1.46-<br>1.65) |     | (1.56-<br>1.79) |     |
|                          | Higher risk (16-19)    | 2.47              | *** | 0.95            | NS  | 2.10            | *** | 2.28            | *** | 0.80              | *** | 4.17            | *** | 1.35            | *** | 1.96            | *** | 2.40            | *** |
|                          |                        | (2.25-<br>2.71)   |     | (0.86-<br>1.06) |     | (1.93-<br>2.29) |     | (2.08-<br>2.50) |     | (0.71-<br>0.90)   |     | (3.81-<br>4.57) |     | (1.24-<br>1.47) |     | (1.79-<br>2.15) |     | (2.18-<br>2.65) |     |
|                          | Dependence (20+)       | 3.02              | *** | 1.04            | NS  | 2.21            | *** | 2.51            | *** | 0.71              | *** | 6.02            | *** | 1.29            | *** | 2.65            | *** | 3.280           | *** |
|                          |                        | (2.71-<br>3.37)   |     | (0.93-<br>1.06) |     | (2.01-<br>2.44) |     | (2.25-<br>2.79) |     | (0.62-<br>0.81)   |     | (5.44-<br>6.66) |     | (1.18-<br>1.42) |     | (2.40-<br>2.93) |     | (2.95-<br>3.65) |     |
| <b>Sex<sup>‡</sup></b>   | Male                   | 0.77              | *** | 1.19            | *** | 0.64            | *** | 0.889           | *** | 1.42              | *** | 1.16            | *** | 0.85            | *** | 0.82            | *** | 0.53            | *** |
|                          |                        | (0.73-<br>0.81)   |     | (1.11-<br>1.26) |     | (0.61-<br>0.67) |     | (0.84-<br>0.94) |     | (1.32-<br>1.52)   |     | (1.10-<br>1.23) |     | (0.80-<br>0.89) |     | (0.78-<br>0.87) |     | (0.50-<br>0.56) |     |
| <b>Red wine</b>          |                        |                   |     |                 |     |                 |     |                 |     |                   |     |                 |     |                 |     |                 |     |                 |     |
| <b>AUDIT<sup>†</sup></b> | Increasing risk (8-15) | 1.23              | *** | 1.189           | *** | 1.31            | *** | 1.28            | *** | 1.19              | *** | 1.57            | *** | 1.31            | *** | 1.18            | **  | 1.82            | *** |
|                          |                        | (1.11-<br>1.37)   |     | (1.13-<br>1.25) |     | (1.23-<br>1.39) |     | (1.21-<br>1.36) |     | (1.12-<br>1.25)   |     | (1.29-<br>1.90) |     | (1.22-<br>1.41) |     | (1.04-<br>1.34) |     | (1.68-<br>1.96) |     |
|                          | Higher risk (16-19)    | 1.41              | *** | 1.20            | *** | 1.53            | *** | 1.45            | *** | 1.31              | *** | 2.68            | *** | 1.72            | *** | 1.74            | *** | 2.64            | *** |
|                          |                        | (1.20-<br>1.65)   |     | (1.13-<br>1.25) |     | (1.39-<br>1.68) |     | (1.32-<br>1.59) |     | (1.20-<br>1.43)   |     | (2.11-<br>3.42) |     | (1.56-<br>1.91) |     | (1.46-<br>2.07) |     | (2.37-<br>2.94) |     |
|                          | Dependence (20+)       | 1.82              | *** | 1.19            | *** | 1.46            | *** | 1.62            | *** | 1.26              | *** | 3.70            | *** | 1.80            | *** | 2.08            | *** | 3.29            | *** |
|                          |                        | (1.55-<br>2.14)   |     | (1.09-<br>1.32) |     | (1.31-<br>1.62) |     | (1.46-<br>1.79) |     | (1.14-<br>1.39)   |     | (2.91-<br>4.71) |     | (1.61-<br>2.02) |     | (1.73-<br>2.49) |     | (2.93-<br>3.69) |     |
| <b>Sex<sup>‡</sup></b>   | Male                   | 1.16              | **  | 0.76            | *** | 0.60            | *** | 0.77            | *** | 0.54              | *** | 0.81            | **  | 0.78            | *** | 0.90            | *   | 0.45            | *** |
|                          |                        |                   |     |                 |     |                 |     |                 |     |                   |     |                 |     |                 |     |                 |     |                 |     |

|                          |                        | (1.05-<br>1.28)         | (0.72-<br>0.80) | (0.57-<br>0.86)         | (0.73-<br>0.81) | (0.52-<br>0.57)         | (0.69-<br>0.94) | (0.73-<br>0.83)         | (0.80-<br>0.10) | (0.43-<br>0.48)         |     |                         |     |                         |     |                          |     |                         |     |
|--------------------------|------------------------|-------------------------|-----------------|-------------------------|-----------------|-------------------------|-----------------|-------------------------|-----------------|-------------------------|-----|-------------------------|-----|-------------------------|-----|--------------------------|-----|-------------------------|-----|
| <b>White wine</b>        |                        |                         |                 |                         |                 |                         |                 |                         |                 |                         |     |                         |     |                         |     |                          |     |                         |     |
| <b>AUDIT<sup>†</sup></b> | Increasing risk (8-15) | 1.57<br>(1.45-<br>1.69) | ***             | 1.44<br>(1.35-<br>1.53) | ***             | 1.04<br>(0.98-<br>1.10) | NS              | 1.47<br>(1.38-<br>1.56) | ***             | 0.86<br>(0.80-<br>0.92) | *** | 2.18<br>(1.79-<br>2.64) | *** | 1.38<br>(1.27-<br>1.50) | *** | 1.38<br>(1.23-<br>1.54)  | *** | 1.68<br>(1.52-<br>1.85) | *** |
|                          | Higher risk (16-19)    | 1.92<br>(1.71-<br>2.16) | ***             | 1.75<br>(1.59-<br>1.94) | ***             | 1.10<br>(1.01-<br>1.20) | *               | 1.69<br>(1.54-<br>1.85) | ***             | 0.94<br>(0.84-<br>1.04) | NS  | 3.53<br>(2.76-<br>4.52) | *** | 1.71<br>(1.52-<br>1.92) | *** | 2.123<br>(0.82-<br>2.49) | *** | 2.54<br>(2.22-<br>2.91) | *** |
|                          | Dependence (20+)       | 2.22<br>(1.96-<br>2.52) | ***             | 1.78<br>(1.60-<br>1.99) | ***             | 1.07<br>(0.96-<br>1.18) | NS              | 1.80<br>(1.63-<br>2.00) | ***             | 0.85<br>(0.76-<br>0.97) | *   | 5.47<br>(4.28-<br>6.99) | *** | 1.99<br>(1.76-<br>2.25) | *** | 2.55<br>(2.16-<br>3.01)  | *** | 3.39<br>(2.95-<br>3.90) | *** |
| <b>Sex<sup>‡</sup></b>   | Male                   | 0.56<br>(0.53-<br>1.60) | ***             | 0.41<br>(0.39-<br>0.44) | ***             | 0.57<br>(0.54-<br>0.60) | ***             | 0.53<br>(0.50-<br>0.56) | ***             | 0.71<br>(0.67-<br>0.76) | *** | 0.76<br>(0.65-<br>0.88) | *** | 0.73<br>(0.69-<br>0.79) | *** | 0.79<br>(0.71-<br>0.87)  | *** | 0.36<br>(0.33-<br>0.39) | *** |
| <b>Beer</b>              |                        |                         |                 |                         |                 |                         |                 |                         |                 |                         |     |                         |     |                         |     |                          |     |                         |     |
| <b>AUDIT<sup>†</sup></b> | Increasing risk (8-15) | 1.58<br>(0.15-<br>1.68) | ***             | 1.36<br>(1.29-<br>1.43) | ***             | 1.55<br>(1.45-<br>1.66) | ***             | 1.58<br>(1.50-<br>1.66) | ***             | 1.02<br>(0.97-<br>1.08) | NS  | 1.70<br>(1.51-<br>1.91) | *** | 1.06<br>(0.97-<br>1.12) | NS  | 1.37<br>(1.25-<br>1.51)  | *** | 1.63<br>(1.48-<br>1.79) | *** |
|                          | Higher risk (16-19)    | 1.94<br>(1.77-<br>2.14) | ***             | 1.50<br>(1.37-<br>1.63) | ***             | 1.98<br>(1.79-<br>2.20) | ***             | 1.98<br>(1.81-<br>2.15) | ***             | 1.09<br>(1.00-<br>1.19) | *   | 2.56<br>(2.19-<br>3.00) | *** | 1.09<br>(0.98-<br>1.22) | NS  | 1.77<br>(1.55-<br>2.03)  | *** | 2.32<br>(1.03-<br>2.65) | *** |
|                          | Dependence (20+)       | 2.14<br>(1.93-<br>2.38) | ***             | 1.63<br>(1.48-<br>1.79) | ***             | 1.94<br>(1.72-<br>2.18) | ***             | 1.96<br>(1.78-<br>2.16) | ***             | 1.11<br>(1.00-<br>1.22) | *   | 3.28<br>(2.79-<br>3.86) | *** | 1.08<br>(0.95-<br>1.22) | NS  | 2.41<br>(2.09-<br>2.77)  | *** | 3.00<br>(1.61-<br>3.45) | *** |
| <b>Sex<sup>‡</sup></b>   | Male                   | 1.25<br>(1.18-<br>1.32) | ***             | 1.77<br>(1.69-<br>1.86) | ***             | 1.41<br>(1.32-<br>1.51) | ***             | 1.55<br>(1.48-<br>1.63) | ***             | 1.46<br>(1.39-<br>1.54) | *** | 1.59<br>(1.43-<br>1.77) | *** | 0.67<br>(0.63-<br>0.72) | *** | 1.01<br>(0.93-<br>1.10)  | NS  | 0.99<br>(0.91-<br>1.07) | NS  |

AUDIT, alcohol use disorders identification test; AOR, adjusted odds ratio; CI, confidence interval; NS, not significant.

\*p<0.05, \*\*p<0.01, \*\*\*p<0.001.

<sup>†</sup>Country of residence, age and educational attainment was also included in the logistic regression model. See online Supplementary Table D.

<sup>‡</sup>Reference category is lower risk (0-7).

<sup>‡</sup>Reference category is female.

**Emotional associations with any type of alcohol by choice of drink in different settings**

1  
2 Finally, how the different emotions associated with drink type influence people's choices of alcoholic beverages in  
3 different settings was examined, taking into account confounding demographic factors (Table 5a and 5b; online  
4 supplementary table E). For each type of emotion, significant differences were reported between emotions elicited  
5 by the types of drinks which were mostly drunk at home compared to on a night out (Table 5a). Reporting a  
6 dependency on alcohol showed a strong association with drinking any type of alcohol which made them feel  
7 energised, sexy and confident whether drinking at home or when out. In addition, respondents dependent on  
8 alcohol reported a greater tendency to select any type of drink that elicited emotions of aggression and tearfulness  
9 when drinking at home or when out. The association between emotions of aggression and dependency was  
10 noticeably strongest, independent of setting. Females more frequently reported drinking types of alcohol at home  
11 and when out which elicit the emotion of feeling sexy compared to men (Table 5b).

12  
13  
14  
15 The youngest age group indicated a very strong relationship with choosing any type of alcohol that made them feel  
16 energised, sexy and confident when drinking outside of the home. However, these relationships were not as strong  
17 when drinking at home. The oldest age group more frequently chose to drink alcohol that made them feel tired and  
18 relaxed when out and the youngest age groups selecting drinks that made them feel tired when drinking at home  
19 (online supplementary table E).  
20  
21  
22  
23  
24  
25  
26  
27  
28  
29  
30  
31  
32  
33  
34  
35  
36  
37  
38  
39  
40  
41  
42  
43  
44  
45  
46  
47  
48  
49  
50  
51  
52  
53  
54  
55  
56  
57  
58  
59  
60

**Table 5a: Bivariate association<sup>¶</sup> for emotions associated with drinking any type of alcohol<sup>‡</sup> by setting, AUDIT score and socio-demographic relationships**

|                          |                                                      |                   |                 | n <sup>¥</sup> | % <sup>¥</sup> | $\chi^2$ (p) <sup>¶</sup> |
|--------------------------|------------------------------------------------------|-------------------|-----------------|----------------|----------------|---------------------------|
| <b>Positive emotions</b> | <b>Mostly drank a drink associated with feeling:</b> | <b>Energised</b>  | <b>At home</b>  | 8008           | 26.84          |                           |
|                          |                                                      |                   | <b>When out</b> | 13259          | 44.44          | 3683.349 (***)            |
|                          |                                                      | <b>Relaxed</b>    | <b>At home</b>  | 19271          | 64.59          |                           |
|                          |                                                      |                   | <b>When out</b> | 13929          | 46.69          | 3428.640 (***)            |
|                          |                                                      | <b>Sexy</b>       | <b>At home</b>  | 9244           | 30.98          |                           |
|                          |                                                      |                   | <b>When out</b> | 10458          | 35.05          | 257.954 (***)             |
| <b>Confident</b>         | <b>At home</b>                                       | 14613             | 48.98           |                |                |                           |
|                          | <b>When out</b>                                      | 17673             | 59.23           | 1642.240 (***) |                |                           |
| <b>Negative emotions</b> | <b>Mostly drank a drink associated with feeling:</b> | <b>Tired</b>      | <b>At home</b>  | 12535          | 42.01          |                           |
|                          |                                                      |                   | <b>When out</b> | 8394           | 28.13          | 2204.450 (***)            |
|                          |                                                      | <b>Aggressive</b> | <b>At home</b>  | 1888           | 6.33           |                           |
|                          |                                                      |                   | <b>When out</b> | 4087           | 13.7           | 1646.066 (***)            |
|                          |                                                      | <b>Ill</b>        | <b>At home</b>  | 3653           | 12.24          |                           |
|                          |                                                      |                   | <b>When out</b> | 6077           | 20.37          | 135.873 (***)             |
|                          |                                                      | <b>Restless</b>   | <b>At home</b>  | 2589           | 8.68           |                           |
|                          |                                                      |                   | <b>When out</b> | 4583           | 15.36          | 1336.490 (***)            |
| <b>Tearful</b>           | <b>At home</b>                                       | 4367              | 14.64           |                |                |                           |
|                          | <b>When out</b>                                      | 4573              | 15.33           | 13.636 (***)   |                |                           |

AUDIT, alcohol use disorders identification test; AOR, adjusted odds ratios; CI, confidence intervals; NS, non significant.

\*p<0.05, \*\*p<0.01, \*\*\*p<0.001.

<sup>¶</sup>McNemar test (x2)

<sup>‡</sup>Emotions from drinking respondents reported regardless of the type of alcohol they associate it with. Includes emotions associated with drinking spirits, white wine, red wine and beer.

<sup>¥</sup>Refers to the number and percentage of respondents out of the whole sample (n=to836) who stated that they mostly drank a type of drink which makes them feel particular emotions in different settings.

Table 5b: Logistic regression model† for emotions associated with drinking any type of alcohol‡ by setting‡, AUDIT score and socio-demographic relationships

|                          |                               | At home          |     | When out          |     | At home          |     | When out         |     | At home           |     | When out         |     | At home          |     | When out         |     |
|--------------------------|-------------------------------|------------------|-----|-------------------|-----|------------------|-----|------------------|-----|-------------------|-----|------------------|-----|------------------|-----|------------------|-----|
|                          |                               | AOR              | p   | AOR               | p   | AOR              | p   | AOR              | p   | AOR               | p   | AOR              | p   | AOR              | p   | AOR              | p   |
|                          |                               | (95%CI)          |     | (95%CI)           |     | (95%CI)          |     | (95%CI)          |     | (95%CI)           |     | (95%CI)          |     | (95%CI)          |     | (95%CI)          |     |
| <b>Positive emotions</b> |                               | <b>Energised</b> |     | <b>Relaxed</b>    |     | <b>Sexy</b>      |     | <b>Confident</b> |     |                   |     |                  |     |                  |     |                  |     |
| <b>AUDIT</b>             | Lower risk (0-7) <sup>€</sup> |                  |     |                   |     |                  |     |                  |     |                   |     |                  |     |                  |     |                  |     |
|                          | Increasing risk (18-15)       | 1.56 (1.47-1.66) | *** | 1.65(1.57-1.75)   | *** | 1.20 (1.14-1.27) | *** | 1.134(1.08-1.20) | *** | 1.45 (1.37-1.54)  | *** | 1.52 (1.43-1.60) | *** | 1.56 (1.48-1.65) | *** | 1.66 (1.58-1.75) | *** |
|                          | Higher risk (16-19)           | 2.08 (1.90-2.28) | *** | 2.25 (2.07-2.46)  | *** | 1.34 (1.23-1.47) | *** | 1.17 (1.08-1.28) | *** | 1.812 (1.66-1.99) | *** | 1.98 (1.82-2.17) | *** | 2.06 (1.89-2.24) | *** | 2.34 (2.14-2.57) | *** |
|                          | Dependence (20+)              | 2.61 (2.36-2.88) | *** | 2.59 (2.35-2.86)  | *** | 1.32 (1.19-1.46) | *** | 1.18 (1.07-1.30) | *** | 1.96 (1.77-2.16)  | *** | 2.08 (1.88-2.29) | *** | 2.15 (1.95-2.37) | *** | 2.31 (2.08-2.56) | *** |
| <b>Sex</b>               | Female <sup>€</sup>           |                  |     |                   |     |                  |     |                  |     |                   |     |                  |     |                  |     |                  |     |
|                          | Male                          | 1.09 (1.03-1.15) | **  | 0.76 (0.72-0.80)  | *** | 0.91 (0.86-0.95) | *** | 1.34 (1.27-1.41) | *** | 0.54 (0.51-0.57)  | *** | 0.64 (0.61-0.68) | *** | 0.99 (0.94-1.04) | NS  | 0.93 (0.86-0.98) | **  |
| <b>Negative emotions</b> |                               | <b>Tired</b>     |     | <b>Aggressive</b> |     | <b>Ill</b>       |     | <b>Tearful</b>   |     |                   |     |                  |     |                  |     |                  |     |
| <b>AUDIT</b>             | Lower risk (0-7) <sup>€</sup> |                  |     |                   |     |                  |     |                  |     |                   |     |                  |     |                  |     |                  |     |
|                          | Increasing risk (18-15)       | 0.99 (0.94-1.04) | NS  | 0.90 (0.85-0.95)  | *** | 1.96 (1.91-2.23) | *** | 2.14 (1.96-2.34) | *** | 1.20 (1.10-1.30)  | *** | 1.18 (1.11-1.27) | *** | 1.70 (1.56-1.84) | *** | 1.71 (1.58-1.85) | *** |
|                          | Higher risk (16-19)           | 0.99 (0.91-1.08) | NS  | 0.98 (0.81-0.98)  | *   | 3.62 (3.08-4.26) | *** | 3.61 (3.21-4.06) | *** | 1.42 (1.26-1.61)  | *** | 1.35 (1.22-1.50) | *** | 2.49 (2.22-2.79) | *** | 2.53 (2.26-2.82) | *** |
|                          | Dependence (20+)              | 0.90 (0.82-0.99) | *   | 0.85 (0.76-0.94)  | **  | 5.13 (4.35-6.05) | *** | 5.10 (4.51-5.76) | *** | 1.61 (1.41-1.84)  | *** | 1.43 (1.29-1.61) | *** | 3.62 (3.21-4.08) | *** | 3.57 (8.18-4.02) | *** |
| <b>Sex</b>               | Female <sup>€</sup>           |                  |     |                   |     |                  |     |                  |     |                   |     |                  |     |                  |     |                  |     |
|                          | Male                          | 1.05 (1.00-1.11) | *   | 1.66 (1.56-1.75)  | *** | 1.54 (1.38-1.72) | *** | 1.11 (0.94-1.10) | NS  | 0.86 (0.80-0.93)  | *** | 0.76 (0.72-0.81) | *** | 0.52 (0.49-0.56) | *** | 0.59 (0.55-0.93) | *** |

AUDIT, alcohol use disorders identification test; AOR, adjusted odds ratios; CI, confidence intervals; NS, non significant.

\*p<0.05, \*\*p<0.01, \*\*\*p<0.001.

†Country of residence, age and educational attainment was also included in the logistic regression model. See online Supplementary Table E.

‡Emotions from drinking respondents reported regardless of the type of alcohol they associate it with. Includes emotions associated with drinking spirits, white wine, red wine and beer.

§Respondents reported which drink type they mostly drank when at home and when out

€reference category

## DISCUSSION

Using an international sample, our study found that different types of alcohol are associated with different types of emotions, eliciting both positive and negative emotions (Table 1), and highlights the complex relationships between drink choice, emotions and the settings in which alcohol is consumed. Emotions were found to differ substantially between different demographic groups and these relationships were maintained after accounting for confounding socio-demographics and level of alcohol dependency (Table 3). The association between drinking spirits and the emotion of aggression was a key finding with 29.8% of respondents reporting this relationship, significantly higher than other types of alcohol ( $p < 0.001$ ; Table 1). Findings suggest dependent drinkers (AUDIT  $> 20$ ) rely on alcohol to obtain the positive emotions they associated with drinking, being five times more likely to feel energised compared to low risk drinkers (Adjusted Odds Ratio (AOR) 4.7; 95%CI 4.07-5.50; Table 3). However, heavier drinkers also reported negative emotions more frequently with respondents being just over six times more likely to report feelings of aggression (AOR 6.4; 95%CI 5.79-7.09;  $p < 0.001$ ; Table 3), which may in part be a result of drinking greater quantities of alcohol in a session so increasing the impact on emotions. Conversely, relationships between tiredness and drinking pattern were negligible and for some drink types (spirits, white wine) heavier drinkers were less likely to report feelings of tiredness. These results are consistent with existing evidence on heavy drinking and alcohol dependence, including the development of tolerance to the sedative effects of alcohol.[22-23]. The reported emotions for wine differed, with red wine drinkers more likely to report tiredness than white wine drinkers. Within the limits of the GDS it was not possible to explore, for instance whether this was due to drinking each at different times of day or expected effects of specific alcoholic drinks potentially influenced by culture or marketing. Females more frequently reported all emotions apart from feelings of aggression and younger age groups more frequently reported all emotions with the exception of aggression and tiredness (Table 3). Our findings support previous research which highlights that male beer drinkers show less aggression than males who drink spirits (Table 4).[24] Spirits are a popular choice of drink in a number of countries, with substantial proportions of the population consuming spirits on a regular basis.[25] Within our sample, spirits were more likely than beer, red wine and white wine to elicit the majority of positive emotions when consumed. However, they were also more likely to be associated with negative emotions (Table 4). These findings suggest that individuals make the assumption that positive emotions associated with drinking particular types of alcohol will outweigh the negative emotions. The continued selection of particular types of alcohol with negative emotional outcomes may in part rely on positive emotions being emphasised by almost ubiquitous advertising [26-27] and negative emotions framed as infrequent and largely a result of abuse. Finally, our results show that individuals dependent on alcohol more frequently associated emotions with alcohol whether they were drinking at home or when out (Table 5).

Existing literature illustrates that previous experiences with alcohol are related to intentions to drink alcohol in the future.[28] Our analyses suggest that individuals are, to some extent, consuming beverages in different settings based on the emotions they perceive to be associated with particular types of alcohol (Table 5). These findings suggest that individuals inadvertently select drinks which are known to elicit negative emotions because they crave the positive emotions that go with them, and link with existing evidence that those dependent on alcohol drink alcohol as a coping mechanism, rather than drinking for pleasure.[7] This was evident particularly amongst heavier drinkers. This highlights a potential emotional gap which individuals may be looking to fill by drinking alcohol. This gap can be a concern, particularly with exploitation by the alcohol industry with advertising focused on pushing the positive emotions associated with alcohol use without outlining the negatives which go alongside them.

Understanding the relationship between different types of alcohol and the emotions and associated behaviours they may elicit may help improve public health messages and health promotion, and may help to prevent escalation to dependent drinking.[6-7, 10] The results from this study can be used to influence behaviour change policy and contribute significantly to the limited evidence base on alcohol use and emotions. Previous studies have tended to focus on the effect of alcohol as a whole.[5-6] These results suggest that the different types of alcohol are not necessarily perceived or used in the same way and therefore harm prevention policy may benefit from treating types of drinks differently; especially when addressing spirits and, for instance their significant association with aggression (Table 4).



1 A strength of the GDS is that it allows relationships between alcohol and emotions to be explored within a large,  
2 international sample which includes a high proportion of younger age respondents who can be difficult to capture  
3 via telephone or face-to-face interviews. This age group corresponds with age groups often studied within this field  
4 of research, for example students and adolescents.[5, 15, 28] Using a unique range of questions, the survey data  
5 allowed for novel analysis on how groups within the survey population associate emotions with different types of  
6 alcohol in different settings. More specific surveys which are perhaps limited for instance to only one country (e.g.  
7 the National Epidemiologic Survey on Alcohol and Related Conditions (NESARC) in America [29]) can examine these  
8 issues in more details within a more tightly defined respondent group.  
9

10 Although the sample size for the study is large, the opportunistic nature of the survey means it should not be  
11 considered representative of any country or region. Thus, the analyses undertaken should not be considered to  
12 represent proportions of any population other than the study sample. As the sample was self-selected, there may be  
13 an over-representation of individuals who are more likely to participate in drug and alcohol use. The sample may  
14 also will be biased towards those with access to the internet. However, confounders of socio-demographics and  
15 alcohol dependency were accounted for in the analysis to illustrate the associations between emotions and drink  
16 types in different groups of the population. This study uses data which has been self-reported by respondents and  
17 the emotions associated with alcohol consumption may have been affected by confounding factors such as mood  
18 prior to drinking and mixing of alcohol drink type in individual drinking sessions which were unable to be controlled  
19 for. Additionally, without knowledge about the amount of alcohol consumed and the rate at which it was drunk,  
20 such inferences remain speculative. Respondents may have also undertaken other activities while consuming specific  
21 drinks such as dancing, socialising and drug use, which may have affected emotions reported to be associated with  
22 each drink type. We also cannot rule out the impact of recall bias and the deliberate misreporting of results.  
23  
24  
25  
26  
27

28 This study is an initial exploration to understand the relationships between perceived emotions and alcohol  
29 consumption. Further research is required into why people choose to consume specific drink types in different  
30 settings, their mood prior to drinking, drinking patterns including combination of drinks consumed on individual  
31 occasions, differences in alcohol volume, mixers consumed with drinks and the effect of alcohol advertising on the  
32 perceived mood of drinkers. This arena of evidence may also benefit from additional qualitative research to further  
33 understand how alcohol makes people feel and how this affects drink choice in different settings. Research using an  
34 experimental approach is also an area for future research to examine the immediate effects on individual emotions  
35 when consuming alcohol.  
36  
37

## 38 CONCLUSION

39 This research adds international evidence to a limited number of studies undertaken on the feelings associated with  
40 drinking different types of alcohol and how such relationships may influence what alcohol is being consumed in  
41 different settings. Findings show that individuals associate different emotional responses with different alcohol  
42 types and identifies variation in such emotions between demographic groups. Feeling positive emotions may in part  
43 be related to the promotion of positive experiences by advertising and the media, but the case for experiencing  
44 negative emotions is less well founded given that negative emotions are generally not promoted. Emotions  
45 experienced could also be related to when the alcohol is drunk, the levels of alcohol within each beverage type and  
46 the different compounds found in different drinks. Consequently, this study represents an initial exploration of  
47 alcohol's perceived relationship with emotions on an international basis across a large sample of young people.  
48 Moreover, alcohol already plays a large part in violence in many countries, but the concept that consumption of  
49 different alcohol products may be more likely to result in violence is rarely reflected in public health responses.  
50 Results from these analyses can be used by public health bodies to better understand alcohol consumption  
51 behaviour and to inform strategies and interventions to promote changes in consumption, particularly amongst  
52 heavier drinkers.  
53  
54  
55  
56  
57  
58  
59  
60

## Contributorship statement

Adam Winstock developed and directed the survey. Mark A Bellis conceived and designed the survey questions on alcohol. Adam Winstock coordinated data collection and Kathryn Ashton carried out data cleaning on the alcohol data. Kathryn Ashton performed the statistical analyses and drafted the manuscript. Kathryn Ashton, Mark A Bellis, Alisha Davies, Karen Hughes and Adam Winstock edited and approved the final manuscript.

## REFERENCES

1. World Health Organisation. *Global status report on alcohol and health 2014*. Geneva: World Health Organisation. 2014.[http://www.who.int/substance\\_abuse/publications/global\\_alcohol\\_report/en/](http://www.who.int/substance_abuse/publications/global_alcohol_report/en/) (accessed 16 November 2016).
2. Lewis-Laietmark C, Wettlaufer A, Shield KD, et al. The effects of alcohol-related harms to others on self-perceived mental well-being in a Canadian sample. *Int J Public Health*. 2016:Nov 29.[epub ahead of print].
3. Lund IO, Moan IS and Storvoll EE. Harm from others' drinking: How problematic do people with and without experiences of harm perceive it to be? *Int J Drug Policy* 2016;12(38):43-49.
4. Bellis MA, Quigg Z, Hughes, et al. Harms from other people's drinking: an international survey of their occurrence, impacts on feeling safe and legislation relating to their control. *BMJ Open* 2015;5(12):e010112.
5. Luhtanen RK and Crocker J. Alcohol use in college students: effects of level of self-esteem, narcissism, and contingencies of self-worth. *Psychology of Addictive Behaviours* 2005;19(1):99-103.
6. Cooper LM, Frone MR, Russell M et al. Drinking to regulate positive and negative emotions: a motivational model of alcohol use. *J Pers Soc Psychol* 1995;69(5):990-1005.
7. Kuntsche E, Knibbe R, Gmel G, et al. 'I drink spirits to get drunk and block out my problems...' Beverage preference, drinking motives and alcohol use in adolescence. *Alcohol and Alcoholism* 2006;41(5):566-573.
8. Cox MW, Hosier SG, Crossley S, et al. Motive for drinking, alcohol consumption, and alcohol-related problems among British secondary-school and university students. *Addict Behav* 2006;31(12): 2147-2157.
9. Goldstein AL and Flett GL. Personality, alcohol use, and drinking motives: a comparison of independent and combined internal drinking motives groups. *Behav Modif* 2009;33(2):182-98.
10. Engels RCME, Wiers R, Lemmers L, et al. Drinking motives, alcohol expectancies, self-efficacy and drinking patterns. *Journal of Drugs and Education* 2005;35(2):147-166.
11. Tucker JA, Vuchinich RE and Sobell MB. Alcohol's effects on human emotions: a review of the stimulation/depression hypothesis. *The International Journal of Addictions* 1982;17(1):155-180.
12. Heath DB. Some Generalizations about Alcohol and Culture. In Heath DB, ed. *International Handbook on Alcohol and Culture*. Greenwood Press, Westport, CT. 1995:350-351.
13. Fairbairn CE and Sayette MA. The Effect of Alcohol on Emotional Inertia: A Test of Alcohol Myopia. *J Abnorm Psychol* 2013;122(3):770-781.
14. Bushman BJ. Human aggression while under the influence of alcohol and other drugs: an integrative research review. *Curr Dir Psychol Sci* 1993;2:148-52.
15. Wiers RW, Beckers L, Jouben K, et al. A short fuse after alcohol: Implicit power associations predict aggressiveness after alcohol consumption in young heavy drinkers with limited executive control. *Pharmacol BioChem Behav* 2009;93(3):300-305.
16. Marmorstein NR. Longitudinal associations between alcohol problems and depressive symptoms: early adolescence through early adulthood. *Alcohol Clin Exp Res* 2009;33(1):49-59.

17. Mitchell JM, O'Neil JP, Janabi M, et al. Alcohol consumption induces endogenous opioid release in the human orbitofrontal cortex and nucleus accumbens. *Sci Transl Med* 2012;11(4):166.
18. Global Drug Survey 2016. <https://www.globaldrugsurvey.com/> [Accessed 14 November 2016].
19. Winstock A, Lynskey M, Borschmann R, et al. Risk of emergency medical treatment following consumption of cannabis or synthetic cannabinoids in a large global sample. *J Psychopharmacol* 2015;29(6):698-703.
20. Kaar SJ, Ferris J, Waldron J, et al. Up: The rise of nitrous oxide abuse. An international survey of contemporary nitrous oxide use. *J Psychopharmacol* 2016;30(4):395-401.
21. Babor T, Higgins-Biddle J, Saunders J, et al. *AUDIT. The alcohol use disorders identification test. Guidelines for use in primary care*. 2<sup>nd</sup> edn. Geneva: World Health Organisation. 2001.  
[http://www.talkingalcohol.com/files/pdfs/WHO\\_audit.pdf](http://www.talkingalcohol.com/files/pdfs/WHO_audit.pdf) (accessed 15 November 2016).
22. Herz A. Endogenous opioid systems and alcohol addiction. *Psychopharmacology* 1997;129(2):99-111.
23. King AC, Houle T, de Wit H, et al. Biphasic alcohol response differs in heavy versus light drinkers. *Alcoholism. Clinical and Experimental Research* 2002;26(6):827-835.
24. Smart RG. Behavioural and social consequences related to the consumption of different beverage types. *J Stud Alcohol* 1996;57:77-84.
25. World Health Organisation. *Global status report on alcohol and health*. 2011.  
[http://www.who.int/substance\\_abuse/publications/global\\_alcohol\\_report/msbgsruprofiles.pdf](http://www.who.int/substance_abuse/publications/global_alcohol_report/msbgsruprofiles.pdf) [accessed 09 November 2016].
26. Wyllie A, Zhang JF and Casswell S. Positive responses to televised beer advertisements associated with drinking and problems reported by 18-29 year olds. *Addiction* 1998; 93(5):749-760.
27. Jones SC and Donovan RJ. Messages in alcohol advertising targeted to youth. *Australia and New Zealand Journal of Public Health*. 2001;25(2):126-131.
28. Aas H, Klepp KI, Labery JC, et al. Predicting adolescents' intentions to drink alcohol: outcome expectancies and self-efficacy. *J Stud on Alcohol* 1995;56(3):293-299.
29. National Institute on Alcohol Abuse and Alcoholism. *National Epidemiologic Survey on Alcohol and Related Conditions-III (NESARC-III)*. 2017. <https://niaaa.nih.gov/research/nesarc-iii> [accessed 01 June 2017].

Supplementary Table A: Sample demographics

|                             |                        | %     | n     |
|-----------------------------|------------------------|-------|-------|
| <b>Sex</b>                  | Male                   | 66.81 | 19934 |
|                             | Female                 | 33.19 | 9902  |
| <b>Age (years)</b>          | 18-24                  | 54.74 | 16333 |
|                             | 25-29                  | 29.31 | 8744  |
|                             | 30-34                  | 15.95 | 4759  |
| <b>Attended high school</b> | No                     | 1.58  | 471   |
|                             | Yes                    | 98.42 | 29365 |
| <b>AUDIT</b>                | Lower risk (0-7)       | 35.45 | 10577 |
|                             | Increasing risk (8-15) | 47.61 | 14205 |
|                             | Higher risk (16-19)    | 9.70  | 2895  |
|                             | Dependence (20+)       | 7.24  | 2159  |
| <b>Country of residence</b> | Australia              | 4.56  | 1360  |
|                             | Austria                | 2.95  | 880   |
|                             | Belgium                | 1.27  | 378   |
|                             | Brazil                 | 0.71  | 213   |
|                             | Canada                 | 1.57  | 468   |
|                             | Colombia               | 1.25  | 372   |
|                             | France                 | 4.95  | 1478  |
|                             | Germany                | 34.50 | 10294 |
|                             | Hungary                | 3.54  | 1055  |
|                             | Ireland                | 0.77  | 230   |
|                             | Italy                  | 4.25  | 1268  |
|                             | Mexico                 | 0.70  | 210   |
|                             | Netherlands            | 5.75  | 1715  |
|                             | New Zealand            | 4.56  | 1360  |
|                             | Norway                 | 2.62  | 782   |
|                             | Portugal               | 0.79  | 237   |
| Spain                       | 2.32                   | 692   |       |
| Sweden                      | 1.05                   | 312   |       |
| Switzerland                 | 7.47                   | 2230  |       |
| United Kingdom              | 8.73                   | 2604  |       |
| United States               | 5.69                   | 1698  |       |

AUDIT, alcohol use disorders identification test

Supplementary Table B: Logistic regression model<sup>¶</sup> for country of residence and relationships with emotions associated with drinking any type of alcohol<sup>€</sup>

|                             |      | Emotions associated with drinking any type of alcohol** |    |                   |    |                   |    |                   |    |                   |    |                   |                   |                   |                   |                   |                   |                   |    |
|-----------------------------|------|---------------------------------------------------------|----|-------------------|----|-------------------|----|-------------------|----|-------------------|----|-------------------|-------------------|-------------------|-------------------|-------------------|-------------------|-------------------|----|
|                             |      | Energised                                               |    | Relaxed           |    | Sexy              |    | Confident         |    | Tired             |    | Aggressive        |                   | Ill               |                   | Restless          |                   | Tearful           |    |
|                             |      | AOR (95% CI)                                            | p  | AOR (95% CI)      | p  | AOR (95% CI)      | p  | AOR (95% CI)      | p  | AOR (95% CI)      | p  | AOR (95% CI)      | p                 | AOR (95% CI)      | p                 | AOR (95% CI)      | p                 | AOR (95% CI)      | p  |
| Country                     | n    |                                                         |    |                   |    |                   |    |                   |    |                   |    |                   |                   |                   |                   |                   |                   |                   |    |
| United Kingdom <sup>‡</sup> | 2604 |                                                         |    |                   |    |                   |    |                   |    |                   |    |                   |                   |                   |                   |                   |                   |                   |    |
|                             | 1029 |                                                         | ** |                   | ** |                   | ** |                   | ** |                   | ** | **                | 0.219 (0.19-0.25) | **                | 0.788 (0.72-0.86) | **                | 0.811 (0.74-0.89) | **                |    |
| Germany                     | 4    | 0.392 (0.35-4.41)                                       | *  | 0.716 (0.62-0.83) | *  | 0.799 (0.73-0.88) | *  | 0.480 (0.42-0.54) | *  | 0.797 (0.69-0.93) | ** | 0.691 (0.63-0.76) | *                 | 0.178 (0.15-0.21) | **                | 1.081 (0.96-1.22) | *                 | 0.579 (0.51-0.66) | ** |
| Switzerland                 | 2230 | 0.713 (0.62-0.83)                                       | *  | 0.715 (0.60-0.86) | *  | 0.981 (0.87-1.11) | NS | 0.564 (0.49-0.66) | *  | 1.130 (0.92-1.39) | NS | 0.871 (0.77-0.99) | *                 | 0.783 (0.66-0.94) | **                | 0.748 (0.66-0.85) | **                | 0.644 (0.57-0.73) | ** |
| Netherlands                 | 1715 | 0.785 (0.66-0.93)                                       | ** | 0.905 (0.73-1.12) | NS | 1.353 (1.18-156)  | *  | 0.739 (0.62-0.88) | ** | 0.651 (0.53-0.80) | *  | 0.646 (0.57-0.74) | *                 | 0.747 (0.63-0.89) | **                | 1.002 (0.88-1.14) | NS                | 1.114 (0.98-1.27) | NS |
| US                          | 1698 | 1.008 (0.85-1.20)                                       | NS | 1.524 (1.20-1.93) | ** | 1.574 (1.37-1.81) | *  | 1.068 (0.89-1.28) | NS | 0.823 (0.67-1.01) | NS | 1.352 (1.19-1.54) | *                 | 0.874 (0.72-0.93) | **                | 1.089 (0.95-1.25) | NS                | 0.916 (0.80-0.95) | NS |
| New Zealand                 | 1360 | 0.904 (0.76-1.08)                                       | NS | 1.337 (1.04-1.71) | *  | 1.016 (0.88-1.17) | NS | 1.064 (0.88-1.28) | NS | 0.550 (0.45-0.68) | *  | 0.896 (0.78-1.03) | NS                | 0.777 (0.65-0.93) | **                | 2.292 (2.01-2.62) | **                | 0.826 (0.72-0.95) | ** |
| France                      | 1478 | 0.958 (0.80-1.14)                                       | NS | 0.934 (0.75-1.17) | NS | 0.881 (0.77-1.01) | NS | 0.617 (0.52-0.73) | *  | 0.360 (0.30-0.43) | *  | 0.936 (0.82-1.07) | NS                | 0.792 (0.66-0.95) | **                | 0.891 (0.78-1.02) | NS                | 0.904 (0.79-1.04) | NS |
| Australia                   | 1360 | 0.715 (0.60-0.85)                                       | *  | 1.616 (1.24-2.11) | *  | 0.918 (0.80-1.06) | NS | 0.850 (0.71-1.02) | NS | 0.728 (0.59-0.90) | ** | 0.628 (0.54-0.73) | *                 | 0.756 (0.62-0.92) | **                | 0.576 (0.49-0.68) | **                | 0.728 (0.62-0.85) | ** |
| Hungary                     | 1055 | 0.886 (0.73-1.07)                                       | NS | 0.346 (0.28-0.42) | *  | 1.198 (1.03-1.40) | *  | 0.682 (0.57-0.82) | *  | 0.438 (0.36-0.54) | ** | 0.882 (0.76-1.03) | NS                | 0.294 (0.25-0.35) | **                | 0.622 (0.54-0.72) | **                | 0.455 (0.39-0.53) | ** |
| Italy                       | 1268 | 0.885 (0.74-1.06)                                       | NS | 0.551 (0.45-0.68) | *  | 0.898 (0.78-1.04) | NS | 0.393 (0.33-0.46) | *  | 0.319 (0.26-0.39) | ** | 1.089 (0.94-1.26) | NS                | 0.180 (0.15-0.22) | **                | 0.977 (0.82-1.16) | NS                | 0.670 (0.56-0.81) | *  |
| Spain                       | 692  | 1.018 (0.81-1.28)                                       | NS | 0.453 (0.36-0.57) | *  | 0.861 (0.72-1.03) | NS | 0.886 (0.70-1.11) | NS | 0.432 (0.34-0.55) | *  | 0.813 (0.68-0.98) | *                 | 0.335 (0.26-0.43) | **                | 1.946 (1.56-2.43) | **                | 1.284 (1.02-1.61) | *  |
| Colombia                    | 372  | 2.404 (1.63-3.55)                                       | *  | 1.481 (0.96-2.30) | NS | 2.339 (1.79-3.06) | *  | 1.044 (0.76-1.43) | NS | 0.558 (0.41-0.76) | *  | 0.937 (0.74-1.18) | NS                | 0.213 (0.18-0.26) | **                | 0.900 (0.77-1.06) | NS                | 0.785 (0.67-0.93) | ** |
| Austria                     | 880  | 0.493 (0.41-0.59)                                       | *  | 0.849 (0.66-1.09) | NS | 0.939 (0.80-1.11) | NS | 0.549 (0.45-0.67) | *  | 0.826 (0.64-1.06) | NS | 0.877 (0.74-1.03) | NS                | 1.169 (0.91-1.49) | **                | 1.889 (1.60-2.23) | **                | 1.222 (1.03-1.44) | *  |
| Norway                      | 782  | 1.919 (1.47-2.50)                                       | *  | 2.106 (1.46-3.04) | *  | 1.470 (1.23-1.76) | *  | 1.100 (0.87-1.40) | NS | 0.850 (0.65-1.11) | NS | 1.358 (1.15-1.60) | *                 | 0.641 (0.49-0.83) | **                | 1.003 (0.82-1.23) | NS                | 0.951 (0.77-1.17) | NS |
| Canada                      | 468  | 1.043 (0.79-1.37)                                       | NS | 1.781 (1.17-2.71) | ** | 1.256 (1.01-1.57) | *  | 0.806 (0.62-1.05) | NS | 0.529 (0.40-0.71) | *  | 1.105 (0.90-1.36) | NS                | 0.230 (0.17-0.31) | **                | 1.283 (0.96-1.71) | NS                | 1.060 (0.79-1.42) | NS |
| Mexico                      | 210  | 1.134 (0.76-1.69)                                       | NS | 1.647 (0.90-3.01) | NS | 1.423 (1.03-1.96) | *  | 0.901 (0.61-1.33) | NS | 0.390 (0.27-0.56) | *  | 1.150 (0.86-1.55) | NS                | 0.905 (0.66-1.24) | **                | 0.731 (0.58-0.92) | NS                | 0.700 (0.56-0.88) | ** |
| Belgium                     | 378  | 0.613 (0.47-0.80)                                       | *  | 0.935 (0.64-1.36) | NS | 1.043 (0.83-1.32) | NS | 0.685 (0.51-0.91) | ** | 0.538 (0.39-0.74) | *  | 0.776 (0.62-0.98) | *                 | 0.751 (0.51-1.10) | NS                | 1.985 (1.49-2.64) | **                | 1.241 (0.93-1.66) | NS |
| Brazil                      | 213  | 0.995 (0.68-1.45)                                       | NS | 2.375 (1.20-4.71) | *  | 3.943 (2.61-5.96) | *  | 1.189 (0.79-1.80) | NS | 0.702 (0.46-1.08) | NS | 1.173 (0.87-1.58) | NS                | 0.253 (0.19-0.34) | **                | 1.264 (0.96-1.66) | NS                | 0.603 (0.45-0.81) | ** |
| Portugal                    | 237  | 0.848 (0.60-1.19)                                       | NS | 0.659 (0.44-0.98) | *  | 1.079 (0.81-1.44) | NS | 0.514 (0.37-0.71) | *  | 0.395 (0.28-0.56) | *  | 0.608 (0.45-0.83) | **                | 1.068 (0.75-1.51) | NS                | 1.409 (1.11-1.79) | NS                | 1.049 (0.82-1.34) | NS |
| Sweden                      | 312  | 1.481 (1.04-2.10)                                       | *  | 2.078 (1.21-3.56) | ** | 1.127 (0.88-1.45) | NS | 0.886 (0.64-1.22) | NS | 1.041 (0.69-1.57) | NS | 0.851 (0.66-1.09) | NS                | 0.761 (0.52-1.11) | NS                | 1.212 (0.92-1.60) | NS                | 1.164 (0.88-1.54) | NS |
| Ireland                     | 230  | 1.411 (0.91-2.19)                                       | NS | 0.795 (0.50-1.25) | NS | 0.809 (0.61-1.08) | NS | 0.547 (0.39-0.77) | ** | 0.711 (0.69-0.93) | NS | 1.038 (0.78-1.37) | NS                |                   | NS                |                   | NS                |                   | NS |

AOR, adjusted odds ratio; CI, confidence interval; NS, not significant.

\*p&lt;0.05, \*\*p&lt;0.01, \*\*\*p&lt;0.001.

<sup>¶</sup>Country variable was included in the logistic regression model for Table 3 and has been included in separate supplementary table due to space restrictions.<sup>€</sup>Emotions from drinking respondents reported regardless of the type of alcohol they associate it with. Includes emotions associated with spirits, white wine, red wine and beer.<sup>‡</sup>reference category.

Supplementary Table C: Bivariate relationship between emotions associated with drinking individual types of alcohol and AUDIT and socio-demographics (%)

|                             |                        | n     | Positive emotions |         |         |           | Negative emotions |            |         |          |         |
|-----------------------------|------------------------|-------|-------------------|---------|---------|-----------|-------------------|------------|---------|----------|---------|
|                             |                        |       | Energised         | Relaxed | Sexy    | Confident | Tired             | Aggressive | Ill     | Restless | Tearful |
| <b>Spirits</b>              |                        |       |                   |         |         |           |                   |            |         |          |         |
| <b>AUDIT</b>                | Lower risk (0-7)       | 10577 | 45.49             | 19.72   | 33.69   | 48.54     | 17.37             | 16.70      | 43.53   | 20.65    | 15.26   |
|                             | Increasing risk (8-15) | 14205 | 62.73             | 19.64   | 45.05   | 62.22     | 14.24             | 32.64      | 49.28   | 29.45    | 23.20   |
|                             | Higher risk (16-19)    | 2895  | 70.92             | 21.49   | 52.54   | 71.16     | 14.68             | 45.35      | 52.82   | 35.13    | 30.95   |
|                             | Dependence (20+)       | 2159  | 75.82             | 23.85   | 54.24   | 73.83     | 13.34             | 54.93      | 52.62   | 42.33    | 38.40   |
|                             | $\chi^2$               |       | 1290.803          | 25.102  | 615.502 | 912.888   | 54.348            | 1908.209   | 139.037 | 593.266  | 758.589 |
|                             | p                      |       | ***               | ***     | ***     | ***       | ***               | ***        | ***     | ***      | ***     |
| <b>Sex</b>                  | Male                   | 19934 | 56.89             | 20.77   | 39.10   | 58.32     | 16.67             | 31.52      | 46.60   | 26.81    | 18.89   |
|                             | Female                 | 9902  | 61.37             | 18.91   | 49.09   | 60.59     | 12.62             | 26.43      | 50.29   | 29.82    | 28.97   |
|                             | $\chi^2$               |       | 55.222            | 14.350  | 270.432 | 14.118    | 83.462            | 82.042     | 36.181  | 29.830   | 388.839 |
|                             | p value                |       | ***               | ***     | ***     | ***       | ***               | ***        | ***     | ***      | ***     |
| <b>Age (years)</b>          | 18-24                  | 16333 | 64.02             | 19.06   | 46.44   | 63.77     | 14.73             | 29.82      | 48.82   | 29.95    | 23.66   |
|                             | 25-29                  | 8744  | 54.07             | 20.17   | 39.30   | 55.38     | 15.37             | 30.23      | 47.47   | 26.81    | 21.25   |
|                             | 30-34                  | 4759  | 46.84             | 23.87   | 34.33   | 49.78     | 17.29             | 29.14      | 45.07   | 22.34    | 19.16   |
|                             | $\chi^2$               |       | 541.325           | 53.009  | 270.366 | 368.307   | 18.666            | 1.724      | 21.304  | 112.493  | 50.157  |
|                             | p                      |       | ***               | ***     | ***     | ***       | ***               | NS         | ***     | ***      | ***     |
| <b>Attended high school</b> | Yes                    | 29365 | 58.20             | 20.03   | 42.33   | 58.89     | 15.27             | 29.70      | 47.73   | 27.80    | 22.07   |
|                             | No                     | 471   | 68.79             | 27.81   | 47.56   | 70.91     | 18.68             | 38.43      | 54.14   | 28.45    | 32.91   |
|                             | $\chi^2$               |       | 21.412            | 17.448  | 5.183   | 27.733    | 4.1540            | 16.8920    | 7.6490  | 0.0970   | 31.5090 |
|                             | p                      |       | ***               | ***     | *       | ***       | *                 | ***        | **      | NS       | ***     |
| <b>Red wine</b>             |                        |       |                   |         |         |           |                   |            |         |          |         |
| <b>AUDIT</b>                | Lower risk (0-7)       | 10577 | 5.56              | 50.23   | 20.85   | 23.22     | 58.70             | 1.47       | 14.67   | 3.97     | 11.62   |
|                             | Increasing risk (8-15) | 14205 | 7.32              | 54.04   | 26.45   | 29.06     | 60.63             | 2.44       | 19.91   | 5.00     | 18.16   |
|                             | Higher risk (16-19)    | 2895  | 8.74              | 54.51   | 30.78   | 32.88     | 61.97             | 4.46       | 26.39   | 7.53     | 23.77   |
|                             | Dependence (20+)       | 2159  | 11.49             | 54.93   | 30.85   | 36.27     | 60.63             | 6.25       | 28.30   | 9.17     | 28.02   |
|                             | $\chi^2$               |       | 113.324           | 44.051  | 202.364 | 235.632   | 14.711            | 209.963    | 354.627 | 134.965  | 507.751 |

|    |                             |                        |       |         |         |         |         |         |         |         |         |         |
|----|-----------------------------|------------------------|-------|---------|---------|---------|---------|---------|---------|---------|---------|---------|
| 1  |                             |                        |       |         |         |         |         |         |         |         |         |         |
| 2  |                             |                        |       |         |         |         |         |         |         |         |         |         |
| 3  |                             | p                      |       | ***     | ***     | ***     | ***     | **      | ***     | ***     | ***     | ***     |
| 4  | <b>Sex</b>                  | Male                   | 19934 | 7.62    | 50.61   | 22.12   | 26.29   | 55.52   | 2.47    | 18.15   | 5.07    | 13.62   |
| 5  |                             | Female                 | 9902  | 6.16    | 57.20   | 31.40   | 31.08   | 69.25   | 2.77    | 21.57   | 5.40    | 24.10   |
| 6  |                             | $\chi^2$               |       | 21.275  | 115.233 | 301.899 | 75.578  | 520.004 | 2.364   | 49.602  | 1.477   | 512.269 |
| 7  |                             | p                      |       | ***     | ***     | ***     | ***     | ***     | NS      | ***     | NS      | ***     |
| 8  | <b>Age (years)</b>          | 18-24                  | 16333 | 7.67    | 49.68   | 27.03   | 28.86   | 58.46   | 2.65    | 20.55   | 5.41    | 17.81   |
| 9  |                             | 25-29                  | 8744  | 6.62    | 55.90   | 24.10   | 27.52   | 62.42   | 2.36    | 18.00   | 5.24    | 16.94   |
| 10 |                             | 30-34                  | 4759  | 6.24    | 57.79   | 20.95   | 25.22   | 61.29   | 2.67    | 17.34   | 4.31    | 14.94   |
| 11 |                             | $\chi^2$               |       | 16.32   | 144.807 | 80.309  | 25.113  | 40.660  | 2.216   | 37.596  | 9.132   | 21.645  |
| 12 |                             | p                      |       | ***     | ***     | ***     | ***     | ***     | NS      | ***     | *       | ***     |
| 13 | <b>Attended high school</b> | Yes                    | 29365 | 7.11    | 52.79   | 25.07   | 27.79   | 60.17   | 2.56    | 19.23   | 5.14    | 17.03   |
| 14 |                             | No                     | 471   | 8.70    | 53.50   | 33.12   | 33.55   | 54.35   | 2.97    | 23.14   | 7.86    | 21.23   |
| 15 |                             | $\chi^2$               |       | 1.778   | 0.095   | 15.924  | 7.633   | 6.534   | 0.314   | 4.565   | 6.964   | 5.772   |
| 16 |                             | p                      |       | NS      | NS      | ***     | **      | *       | NS      | *       | **      | *       |
| 17 | <b>White wine</b>           |                        |       |         |         |         |         |         |         |         |         |         |
| 18 | <b>AUDIT</b>                | Lower risk (0-7)       | 10577 | 11.55   | 31.70   | 19.38   | 22.72   | 19.08   | 1.43    | 10.28   | 4.76    | 6.44    |
| 19 |                             | Increasing risk (8-15) | 14205 | 16.11   | 32.81   | 25.11   | 30.14   | 17.67   | 2.77    | 15.19   | 6.33    | 10.22   |
| 20 |                             | Higher risk (16-19)    | 2895  | 18.58   | 34.44   | 28.77   | 33.85   | 19.69   | 4.49    | 20.00   | 9.50    | 14.89   |
| 21 |                             | Dependence (20+)       | 2159  | 20.70   | 34.14   | 29.13   | 35.62   | 16.67   | 6.62    | 23.25   | 11.21   | 18.94   |
| 22 |                             | $\chi^2$               |       | 195.650 | 10.862  | 201.011 | 287.306 | 11.553  | 223.999 | 361.664 | 176.759 | 419.873 |
| 23 |                             | p                      |       | ***     | *       | ***     | ***     | **      | ***     | ***     | ***     | ***     |
| 24 | <b>Sex</b>                  | Male                   | 19934 | 12.82   | 28.21   | 18.29   | 24.04   | 16.51   | 2.60    | 13.21   | 6.06    | 6.85    |
| 25 |                             | Female                 | 9902  | 19.58   | 41.65   | 34.67   | 36.78   | 22.32   | 3.01    | 17.09   | 7.18    | 16.23   |
| 26 |                             | $\chi^2$               |       | 236.235 | 543.290 | 980.770 | 529.645 | 148.465 | 4.093   | 80.084  | 13.799  | 648.311 |
| 27 |                             | p                      |       | ***     | ***     | ***     | ***     | ***     | *       | ***     | ***     | ***     |
| 28 | <b>Age (years)</b>          | 18-24                  | 16333 | 15.67   | 34.68   | 25.98   | 29.76   | 20.98   | 2.45    | 15.49   | 6.23    | 11.62   |
| 29 |                             | 25-29                  | 8744  | 14.67   | 31.08   | 22.42   | 27.57   | 15.95   | 2.80    | 13.53   | 6.62    | 8.46    |
| 30 |                             | 30-34                  | 4759  | 13.72   | 28.68   | 18.39   | 24.44   | 14.29   | 3.61    | 12.88   | 6.77    | 7.04    |
| 31 |                             | $\chi^2$               |       | 12.40   | 74.345  | 129.206 | 54.339  | 160.325 | 18.973  | 29.626  | 2.483   | 117.299 |
| 32 |                             | p                      |       | **      | ***     | ***     | ***     | ***     | ***     | ***     | NS      | ***     |



|    |                        |       |         |         |         |         |         |         |         |         |         |
|----|------------------------|-------|---------|---------|---------|---------|---------|---------|---------|---------|---------|
| 1  |                        |       |         |         |         |         |         |         |         |         |         |
| 2  |                        |       |         |         |         |         |         |         |         |         |         |
| 3  | <b>Attended high</b>   |       |         |         |         |         |         |         |         |         |         |
| 4  | <b>school</b>          |       |         |         |         |         |         |         |         |         |         |
| 5  | Yes                    | 29365 | 15.04   | 32.60   | 23.66   | 28.19   | 18.37   | 2.72    | 14.44   | 6.38    | 9.90    |
| 6  | No                     | 471   | 16.56   | 37.15   | 27.60   | 32.91   | 22.72   | 3.61    | 18.47   | 9.77    | 14.01   |
| 7  | $\chi^2$               |       | 0.836   | 4.379   | 3.970   | 5.083   | 5.830   | 1.363   | 6.090   | 8.842   | 8.742   |
| 8  | p                      |       | NS      | *       | *       | *       | *       | NS      | *       | **      | **      |
| 9  | <b>Beer</b>            |       |         |         |         |         |         |         |         |         |         |
| 10 | <b>AUDIT</b>           |       |         |         |         |         |         |         |         |         |         |
| 11 | Lower risk (0-7)       | 10577 | 18.17   | 43.18   | 14.19   | 34.93   | 37.21   | 3.91    | 15.27   | 6.66    | 6.60    |
| 12 | Increasing risk (8-15) | 14205 | 26.93   | 52.42   | 20.56   | 47.98   | 39.10   | 6.98    | 17.04   | 9.57    | 10.35   |
| 13 | Higher risk (16-19)    | 2895  | 31.47   | 55.54   | 24.21   | 54.75   | 41.52   | 10.67   | 18.55   | 12.54   | 13.96   |
| 14 | Dependence (20+)       | 2159  | 33.67   | 58.22   | 23.44   | 55.21   | 42.57   | 13.52   | 19.08   | 16.67   | 17.46   |
| 15 | $\chi^2$               |       | 444.546 | 323.844 | 261.117 | 684.950 | 33.464  | 365.745 | 32.689  | 263.021 | 324.623 |
| 16 | p                      |       | ***     | ***     | ***     | ***     | ***     | ***     | ***     | ***     | ***     |
| 17 | <b>Sex</b>             |       |         |         |         |         |         |         |         |         |         |
| 18 | Male                   | 19934 | 26.16   | 54.67   | 20.58   | 47.94   | 41.74   | 7.60    | 14.55   | 9.43    | 9.99    |
| 19 | Female                 | 9902  | 21.93   | 40.19   | 15.40   | 37.69   | 33.23   | 4.97    | 21.05   | 9.16    | 9.67    |
| 20 | $\chi^2$               |       | 63.290  | 554.585 | 116.075 | 281.321 | 201.887 | 73.010  | 200.433 | 0.575   | 0.728   |
| 21 | p                      |       | ***     | ***     | ***     | ***     | ***     | ***     | ***     | NS      | NS      |
| 22 | <b>Age (years)</b>     |       |         |         |         |         |         |         |         |         |         |
| 23 | 18-24                  | 16333 | 26.77   | 52.09   | 20.36   | 47.88   | 39.58   | 7.41    | 17.41   | 10.08   | 10.39   |
| 24 | 25-29                  | 8744  | 23.25   | 47.93   | 17.91   | 42.22   | 38.85   | 5.92    | 16.55   | 8.81    | 9.71    |
| 25 | 30-34                  | 4759  | 20.61   | 45.79   | 15.49   | 37.30   | 36.75   | 5.86    | 14.58   | 7.77    | 8.47    |
| 26 | $\chi^2$               |       | 89.98   | 77.123  | 64.484  | 194.018 | 12.448  | 26.736  | 21.430  | 27.385  | 15.704  |
| 27 | p                      |       | ***     | ***     | ***     | ***     | **      | ***     | ***     | ***     | ***     |
| 28 | <b>Attended high</b>   |       |         |         |         |         |         |         |         |         |         |
| 29 | <b>school</b>          |       |         |         |         |         |         |         |         |         |         |
| 30 | Yes                    | 29365 | 24.66   | 49.83   | 18.83   | 44.38   | 38.79   | 6.69    | 16.63   | 9.30    | 9.83    |
| 31 | No                     | 471   | 30.57   | 52.02   | 21.23   | 54.56   | 46.92   | 9.13    | 21.66   | 11.89   | 13.16   |
| 32 | $\chi^2$               |       | 8.696   | 0.886   | 1.754   | 19.482  | 12.901  | 4.403   | 8.4190  | 3.6700  | 5.7780  |
| 33 | p                      |       | **      | NS      | NS      | ***     | ***     | *       | **      | NS      | *       |

AUDIT, alcohol use disorders identification test; NS, not significant.

\*p<0.05, \*\*p<0.01, \*\*\*p<0.001.



Supplementary Table D: Logistic regression model<sup>¶</sup> for age, educational attainment and country of residence and relationships with emotions associated with each individual drink type

|                 |                                         |             |       | Emotions associated with individual drink type |     |                   |     |                   |     |                   |     |                   |     |                   |     |                   |     |                   |     |                   |     |  |
|-----------------|-----------------------------------------|-------------|-------|------------------------------------------------|-----|-------------------|-----|-------------------|-----|-------------------|-----|-------------------|-----|-------------------|-----|-------------------|-----|-------------------|-----|-------------------|-----|--|
|                 |                                         |             |       | Energised                                      |     | Relaxed           |     | Sexy              |     | Confident         |     | Tired             |     | Aggressive        |     | Ill               |     | Restless          |     | Tearful           |     |  |
| n               |                                         |             |       | AOR (95% CI)                                   | p   | AOR (95% CI)      | p   | AOR (95% CI)      | p   | AOR (95% CI)      | p   | AOR (95% CI)      | p   | AOR (95% CI)      | p   | AOR (95% CI)      | p   | AOR (95% CI)      | p   | AOR (95% CI)      | p   |  |
| <b>Spirits</b>  |                                         |             |       |                                                |     |                   |     |                   |     |                   |     |                   |     |                   |     |                   |     |                   |     |                   |     |  |
|                 | <b>Age (years)<sup>€</sup></b>          | 25-29       | 8744  | 0.722 (0.68-0.76)                              | *** | 1.167 (1.09-1.25) | *** | 0.804 (0.76-0.85) | *** | 0.765 (0.72-0.81) | *** | 1.043 (0.97-1.12) | NS  | 1.119 (1.05-1.19) | *** | 1.02 (0.97-1.08)  | NS  | 0.909 (0.86-0.97) | **  | 0.96 (0.90-1.02)  | NS  |  |
|                 |                                         | 30-34       | 4759  | 0.533 (0.50-0.57)                              | *** | 1.355 (1.25-1.47) | *** | 0.668 (0.62-0.72) | *** | 0.607 (0.57-0.65) | *** | 1.166 (1.07-1.27) | **  | 1.125 (1.04-1.21) | **  | 0.947 (0.89-1.01) | NS  | 0.735 (0.68-0.80) | *** | 0.883 (0.81-0.96) | **  |  |
|                 | <b>Attended high school<sup>¥</sup></b> | Yes         | 29365 | 0.909 (0.74-1.12)                              | NS  | 0.822 (0.67-1.02) | NS  | 1.03 (0.85-1.25)  | NS  | 0.817 (0.66-1.01) | NS  | 0.849 (0.67-1.08) | NS  | 0.87 (0.71-1.06)  | NS  | 1.004 (0.83-1.22) | NS  | 1.126 (0.91-1.39) | NS  | 0.676 (0.55-0.83) | *** |  |
|                 | <b>Country<sup>†</sup></b>              | Germany     | 10294 | 0.330 (0.30-0.37)                              | *** | 0.544 (0.49-0.61) | *** | 0.727 (0.67-0.80) | NS  | 0.482 (0.44-0.53) | *** | 1.456 (1.27-1.67) | *** | 0.989 (0.90-1.09) | NS  | 0.871 (0.80-0.95) | **  | 0.824 (0.75-0.91) | *** | 0.667 (0.60-0.74) | *** |  |
|                 |                                         | Switzerland | 2230  | 0.488 (0.43-0.55)                              | *** | 0.760 (0.66-0.88) | *** | 0.921 (0.82-1.04) | *** | 0.538 (0.48-0.61) | *** | 1.046 (0.87-1.26) | NS  | 0.918 (0.80-1.05) | NS  | 0.614 (0.55-0.69) | *** | 0.898 (0.79-1.02) | NS  | 0.500 (0.47-0.64) | *** |  |
|                 |                                         | Netherlands | 1715  | 0.443 (0.39-0.51)                              | *** | 1.631 (1.42-1.88) | *** | 0.917 (0.81-1.04) | NS  | 0.625 (0.55-0.71) | *** | 2.050 (1.72-2.45) | *** | 0.761 (0.66-0.88) | *** | 1.719 (0.52-0.95) | *** | 0.728 (0.63-0.84) | *** | 0.724 (0.63-0.84) | *** |  |
|                 |                                         | US          | 1698  | 0.984 (0.85-1.14)                              | NS  | 1.791 (1.56-2.06) | *** | 1.600 (1.41-1.82) | *   | 1.263 (1.10-1.46) | **  | 1.798 (1.51-2.15) | *** | 1.917 (1.68-2.19) | *** | 1.778 (1.57-2.01) | *** | 0.980 (0.86-1.12) | NS  | 1.232 (1.07-1.41) | **  |  |
|                 |                                         | New Zealand | 1360  | 0.690 (0.60-0.80)                              | *** | 1.624 (1.40-1.89) | *** | 0.975 (0.85-1.12) | NS  | 0.940 (0.81-1.09) | NS  | 1.531 (1.26-1.86) | *** | 1.104 (0.95-1.28) | NS  | 1.200 (1.05-1.67) | **  | 0.932 (0.80-1.08) | NS  | 1.229 (1.06-1.43) | **  |  |
|                 |                                         | France      | 1478  | 0.711 (0.62-0.82)                              | *** | 1.550 (1.34-1.79) | *** | 0.876 (0.77-1.00) | NS  | 0.626 (0.55-0.72) | *** | 2.510 (2.11-2.99) | *** | 1.200 (1.04-1.38) | *   | 1.814 (1.59-2.07) | *** | 2.502 (2.19-2.86) | *** | 1.094 (0.95-1.26) | NS  |  |
|                 |                                         | Australia   | 1360  | 0.648 (0.56-0.75)                              | *** | 1.619 (1.40-1.88) | *** | 0.945 (0.83-1.08) | *** | 0.798 (0.69-0.92) | **  | 1.324 (1.08-1.62) | **  | 0.793 (0.68-0.92) | **  | 0.974 (0.85-1.11) | NS  | 0.742 (0.64-0.86) | *** | 0.912 (0.78-1.06) | NS  |  |
|                 |                                         | Hungary     | 1055  | 0.622 (0.53-0.73)                              | *** | 0.485 (0.39-0.60) | *** | 0.996 (0.86-1.15) | NS  | 0.622 (0.53-0.72) | *** | 1.789 (1.46-2.19) | *** | 1.198 (1.02-1.41) | *   | 2.029 (1.75-2.35) | *** | 0.533 (0.45-0.64) | *** | 0.603 (0.50-0.73) | *** |  |
|                 |                                         | Italy       | 1268  | 0.627 (0.54-0.73)                              | *** | 0.623 (0.52-0.75) | *** | 0.730 (0.63-0.84) | *** | 0.359 (0.31-0.41) | *** | 1.557 (1.28-1.90) | *** | 1.335 (1.15-1.55) | *** | 1.223 (1.07-1.40) | **  | 0.661 (0.56-0.78) | *** | 0.500 (0.42-0.60) | *** |  |
|                 |                                         | Spain       | 692   | 0.851 (0.70-1.03)                              | NS  | 0.825 (0.67-1.02) | NS  | 1.069 (0.90-1.27) | **  | 1.040 (0.86-1.26) | NS  | 1.663 (1.31-2.10) | *** | 1.136 (0.94-1.37) | NS  | 0.714 (0.60-0.85) | *** | 1.133 (0.94-1.36) | NS  | 0.848 (0.69-1.04) | NS  |  |
|                 |                                         | Colombia    | 372   | 1.556 (1.18-2.05)                              | **  | 1.035 (0.80-1.34) | NS  | 1.823 (1.46-2.28) | *   | 1.050 (0.82-1.34) | NS  | 1.236 (0.89-1.71) | NS  | 1.285 (1.02-1.63) | *   | 1.014 (0.82-1.26) | NS  | 1.921 (1.54-2.40) | *** | 1.487 (1.78-1.88) | **  |  |
|                 |                                         | Austria     | 880   | 0.340 (0.29-0.40)                              | *** | 0.412 (0.32-0.52) | *** | 0.764 (0.65-0.90) | NS  | 0.467 (0.40-0.55) | *** | 0.904 (0.70-1.17) | NS  | 1.238 (1.04-1.47) | *   | 0.773 (0.66-0.90) | **  | 0.820 (0.69-0.98) | *   | 0.585 (0.48-0.71) | *** |  |
|                 |                                         | Norway      | 782   | 0.843 (0.70-1.01)                              | NS  | 0.712 (0.58-0.88) | **  | 0.843 (0.72-0.99) | NS  | 0.746 (0.63-0.89) | **  | 1.748 (1.40-2.19) | *** | 2.086 (1.76-2.47) | *** | 2.227 (1.88-2.63) | *** | 1.865 (1.58-2.20) | *** | 1.243 (1.04-1.48) | *   |  |
|                 |                                         | Canada      | 468   | 0.952 (0.76-1.20)                              | NS  | 1.676 (1.35-2.08) | *** | 1.096 (0.90-1.34) | NS  | 0.863 (0.70-1.07) | NS  | 1.718 (1.31-2.26) | *** | 1.506 (1.22-1.86) | *** | 1.360 (1.12-1.66) | **  | 0.998 (0.80-1.24) | NS  | 0.951 (0.76-1.19) | NS  |  |
|                 |                                         | Mexico      | 210   | 0.768 (0.56-1.05)                              | NS  | 2.073 (1.54-2.79) | *** | 1.279 (0.96-1.70) | *** | 0.743 (0.55-1.00) | NS  | 1.721 (1.18-2.52) | *** | 1.415 (1.05-1.91) | *   | 0.651 (0.49-0.87) | **  | 1.118 (0.83-1.51) | NS  | 1.134 (0.83-1.56) | NS  |  |
|                 |                                         | Belgium     | 378   | 0.506 (0.40-0.64)                              | *** | 1.458 (1.14-1.86) | **  | 0.841 (0.67-1.05) | NS  | 0.596 (0.48-0.75) | *** | 1.602 (1.18-2.17) | **  | 1.025 (0.81-1.30) | NS  | 1.664 (1.34-2.07) | *** | 0.848 (0.67-1.08) | NS  | 0.728 (0.56-0.95) | *   |  |
|                 |                                         | Brazil      | 213   | 0.955 (0.70-1.31)                              | NS  | 1.445 (1.06-1.98) | *   | 1.880 (1.41-2.51) | NS  | 1.049 (0.77-1.43) | NS  | 1.419 (0.95-2.12) | NS  | 1.742 (1.29-2.35) | *** | 1.674 (1.26-2.23) | *** | 2.168 (1.63-2.88) | *** | 1.196 (0.88-1.63) | NS  |  |
|                 |                                         | Portugal    | 237   | 0.647 (0.49-0.86)                              | **  | 1.359 (1.01-1.84) | *   | 1.311 (1.00-1.72) | **  | 0.609 (0.46-0.80) | *** | 1.104 (0.73-1.67) | NS  | 0.832 (0.61-1.14) | NS  | 0.736 (0.56-0.97) | *   | 1.145 (0.86-1.53) | NS  | 0.586 (0.41-0.83) | **  |  |
|                 |                                         | Sweden      | 312   | 0.992 (0.76-1.30)                              | NS  | 0.904 (0.68-1.21) | NS  | 1.066 (0.84-1.36) | *** | 0.845 (0.65-1.09) | NS  | 1.823 (1.34-2.49) | *** | 1.221 (0.95-1.58) | NS  | 2.023 (1.59-2.58) | *** | 1.099 (0.85-1.42) | NS  | 1.019 (0.77-1.34) | NS  |  |
|                 |                                         | Ireland     | 230   | 1.254 (0.89-1.77)                              | NS  | 0.693 (0.48-1.00) | *   | 0.690 (0.52-0.91) | NS  | 0.671 (0.50-0.90) | **  | 0.347 (0.78-0.69) | **  | 1.382 (1.04-1.84) | *   | 0.875 (0.67-1.15) | NS  | 1.133 (0.85-1.51) | NS  | 1.171 (0.87-1.57) | NS  |  |
| <b>Red wine</b> |                                         |             |       |                                                |     |                   |     |                   |     |                   |     |                   |     |                   |     |                   |     |                   |     |                   |     |  |
|                 | <b>Age (years)<sup>€</sup></b>          | 25-29       | 8744  | 0.870 (0.78-0.97)                              | *   | 1.368 (1.30-1.44) | *** | 0.931 (0.88-0.99) | *   | 0.998 (0.94-1.06) | NS  | 1.220 (1.15-1.29) | *** | 0.969 (0.82-1.15) | NS  | 0.910 (0.85-0.98) | **  | 1.028 (0.91-1.16) | *   | 1.012 (0.94-1.09) | NS  |  |
|                 |                                         | 30-34       | 4759  | 0.799 (0.70-0.92)                              | **  | 1.532 (1.43-1.64) | *** | 0.793 (0.73-0.86) | *** | 0.876 (0.81-0.95) | **  | 1.223 (1.14-1.31) | *** | 1.09 (0.89-1.34)  | NS  | 0.845 (0.77-0.92) | *** | 0.824 (0.70-0.97) | NS  | 0.970 (0.88-1.06) | NS  |  |
|                 | <b>Attended high school<sup>¥</sup></b> | Yes         | 29365 | 0.963 (0.69-1.35)                              | NS  | 1.196 (0.99-1.45) | NS  | 0.859 (0.70-1.05) | NS  | 0.906 (0.74-1.11) | NS  | 1.469 (1.21-1.78) | *** | 0.809 (0.47-1.41) | NS  | 0.979 (0.78-1.23) | *** | 0.748 (0.53-1.06) | NS  | 0.846 (0.67-1.07) | NS  |  |

|    |                                         |             |       |                   |     |                   |     |                   |     |                   |     |                   |     |                   |     |                    |     |                   |     |                   |     |
|----|-----------------------------------------|-------------|-------|-------------------|-----|-------------------|-----|-------------------|-----|-------------------|-----|-------------------|-----|-------------------|-----|--------------------|-----|-------------------|-----|-------------------|-----|
| 1  |                                         |             |       | 0.712 (0.89-0.87) | *   | 0.702 (0.64-0.77) | *** | 0.539 (0.49-0.60) | *** | 0.526 (0.48-0.58) | *** | 0.834 (0.76-0.92) | *** | 0.329 (0.25-0.43) | *** | 0.362 (0.33-0.40)  | *** | 0.737 (0.60-0.91) | **  | 1.005 (0.90-1.12) | NS  |
| 2  | <b>Country<sup>†</sup></b>              | Germany     | 10294 |                   |     |                   |     |                   |     |                   |     |                   |     |                   |     |                    |     |                   |     |                   |     |
| 3  |                                         |             |       | 0.496 (0.36-0.68) | *** | 0.887 (0.79-1.00) | *   | 0.458 (0.40-0.53) | *** | 0.514 (0.45-0.59) | *** | 2.186 (1.91-2.50) | *** | 0.369 (0.24-0.57) | *** | 0.272 (0.23-0.32)  | *** | 0.740 (0.55-1.00) | NS  | 0.697 (0.59-0.82) | *** |
| 4  |                                         | Switzerland | 2230  |                   |     |                   |     |                   |     |                   |     |                   |     |                   |     |                    |     |                   |     |                   |     |
| 5  |                                         |             |       | 0.809 (0.61-1.07) | NS  | 1.074 (0.95-1.22) | NS  | 0.907 (0.79-1.04) | NS  | 0.824 (0.72-0.94) | **  | 0.796 (0.70-0.91) | **  | 0.348 (0.22-0.54) | *** | 0.521 (0.45-0.60)  | *** | 0.965 (0.72-1.29) | NS  | 0.591 (0.50-0.70) | *** |
| 6  |                                         | Netherlands | 1715  |                   |     |                   |     |                   |     |                   |     |                   |     |                   |     |                    |     |                   |     |                   |     |
| 7  |                                         |             |       | 1.598 (1.26-2.03) | *** | 1.282 (1.13-1.46) | *** | 1.498 (0.32-1.71) | *** | 0.967 (0.85-1.10) | NS  | 1.074 (0.94-1.23) | NS  | 0.728 (0.51-1.03) | NS  | 0.741 (0.64-0.85)  | *** | 1.605 (1.24-2.08) | *** | 1.418 (1.22-1.65) | *** |
| 8  |                                         | US          | 1698  |                   |     |                   |     |                   |     |                   |     |                   |     |                   |     |                    |     |                   |     |                   |     |
| 9  |                                         |             |       | 1.753 (1.36-2.25) | *** | 0.662 (0.58-0.76) | *** | 1.042 (0.90-1.21) | NS  | 1.295 (1.13-1.49) | *** | 0.476 (0.42-0.55) | *** | 1.183 (0.86-1.64) | NS  | 1.277 (1.11-1.47)  | *** | 1.403 (1.05-1.87) | *   | 0.612 (0.51-0.74) | *** |
| 10 |                                         | New Zealand | 1360  |                   |     |                   |     |                   |     |                   |     |                   |     |                   |     |                    |     |                   |     |                   |     |
| 11 |                                         |             |       | 2.634 (2.11-3.29) | *** | 0.652 (0.57-0.74) | *** | 0.741 (0.64-0.86) | *** | 1.022 (0.89-1.17) | NS  | 0.444 (0.39-0.51) | *** | 1.235 (0.91-1.68) | NS  | 0.959 (0.83-1.10)  | NS  | 2.953 (2.33-3.74) | *** | 0.818 (0.69-0.97) | *   |
| 12 |                                         | France      | 1478  |                   |     |                   |     |                   |     |                   |     |                   |     |                   |     |                    |     |                   |     |                   |     |
| 13 |                                         |             |       | 1.049 (0.79-1.39) | NS  | 1.035 (0.91-1.19) | NS  | 0.929 (0.80-1.08) | NS  | 1.012 (0.88-1.16) | NS  | 1.010 (0.88-1.16) | NS  | 0.858 (0.61-1.22) | NS  | 1.033 (0.89-1.19)  | NS  | 1.561 (1.18-2.06) | **  | 0.998 (0.84-1.18) | NS  |
| 14 |                                         | Australia   | 1360  |                   |     |                   |     |                   |     |                   |     |                   |     |                   |     |                    |     |                   |     |                   |     |
| 15 |                                         |             |       | 2.641 (2.07-3.37) | *** | 0.339 (0.29-0.40) | *** | 1.135 (0.97-1.33) | NS  | 0.748 (0.64-0.88) | *** | 0.355 (0.31-0.41) | *** | 1.371 (0.97-1.93) | NS  | 0.748 (0.63-0.89)  | **  | 1.570 (1.16-2.12) | **  | 0.785 (0.64-0.96) | *   |
| 16 |                                         | Hungary     | 1055  |                   |     |                   |     |                   |     |                   |     |                   |     |                   |     |                    |     |                   |     |                   |     |
| 17 |                                         |             |       | 4.045 (3.25-5.03) | *** | 0.613 (0.54-0.70) | *** | 0.945 (0.81-1.10) | NS  | 1.075 (0.93-1.24) | NS  | 0.514 (0.45-0.59) | *** | 1.838 (1.36-2.48) | *** | 0.628 (0.53-0.74)  | *** | 1.542 (1.16-2.06) | **  | 0.740 (0.61-0.90) | **  |
| 18 |                                         | Italy       | 1268  |                   |     |                   |     |                   |     |                   |     |                   |     |                   |     |                    |     |                   |     |                   |     |
| 19 |                                         |             |       | 2.951 (2.26-3.86) | *** | 0.582 (0.49-0.69) | *** | 0.743 (0.61-0.90) | **  | 1.277 (1.07-1.52) | **  | 0.572 (0.48-0.68) | *** | 0.941 (0.60-1.48) | NS  | 0.372 (0.29-0.47)  | *** | 1.645 (1.17-2.32) | **  | 0.667 (0.52-0.85) | **  |
| 20 |                                         | Spain       | 692   |                   |     |                   |     |                   |     |                   |     |                   |     |                   |     |                    |     |                   |     |                   |     |
| 21 |                                         |             |       | 2.062 (1.43-2.97) | *** | 1.114 (0.89-1.39) | NS  | 1.101 (0.87-1.40) | NS  | 0.688 (0.54-0.88) | **  | 0.732 (0.89-0.92) | **  | 0.263 (0.10-0.72) | **  | 0.454 (0.34-0.61)  | *** | 1.671 (1.09-2.56) | *   | 0.824 (0.61-1.11) | NS  |
| 22 |                                         | Colombia    | 372   |                   |     |                   |     |                   |     |                   |     |                   |     |                   |     |                    |     |                   |     |                   |     |
| 23 |                                         |             |       | 0.796 (0.55-1.15) | NS  | 0.793 (0.68-0.93) | **  | 0.623 (0.52-0.75) | *** | 0.685 (0.58-0.81) | *** | 0.597 (0.51-0.70) | *** | 0.380 (0.21-0.69) | **  | 0.287 (0.23-0.36)  | *** | 0.612 (0.39-0.94) | *   | 0.819 (0.66-1.01) | NS  |
| 24 |                                         | Austria     | 880   |                   |     |                   |     |                   |     |                   |     |                   |     |                   |     |                    |     |                   |     |                   |     |
| 25 |                                         |             |       | 3.063 (2.37-3.95) | *** | 1.823 (0.53-2.17) | *** | 1.433 (1.21-1.70) | *** | 1.351 (1.15-1.59) | *** | 0.952 (0.80-1.13) | NS  | 0.600 (0.37-0.98) | *   | 1.098 (0.92-1.31)  | NS  | 1.821 (1.33-2.49) | *** | 1.409 (1.16-1.71) | *** |
| 26 |                                         | Norway      | 782   |                   |     |                   |     |                   |     |                   |     |                   |     |                   |     |                    |     |                   |     |                   |     |
| 27 |                                         |             |       | 2.717 (1.99-3.71) | *** | 1.154 (0.94-1.41) | NS  | 1.641 (1.34-2.01) | *** | 1.253 (1.02-1.54) | *   | 0.674 (0.55-0.83) | *** | 0.940 (0.56-1.59) | NS  | 0.747 (0.59-0.94)  | *   | 1.999 (1.38-2.89) | *** | 1.250 (0.98-1.59) | NS  |
| 28 |                                         | Canada      | 468   |                   |     |                   |     |                   |     |                   |     |                   |     |                   |     |                    |     |                   |     |                   |     |
| 29 |                                         |             |       | 3.000 (1.99-4.53) | *** | 1.147 (0.86-1.53) | NS  | 1.685 (1.26-2.25) | *** | 0.848 (0.62-1.15) | NS  | 0.501 (0.38-0.67) | *** | 1.289 (0.68-2.45) | NS  | 0.502 (0.35-0.72)  | *** | 1.527 (0.88-2.66) | NS  | 1.028 (0.72-1.47) | NS  |
| 30 |                                         | Mexico      | 210   |                   |     |                   |     |                   |     |                   |     |                   |     |                   |     |                    |     |                   |     |                   |     |
| 31 |                                         |             |       | 1.190 (0.77-1.83) | NS  | 1.001 (0.80-1.25) | NS  | 0.773 (0.60-0.99) | *   | 0.698 (0.55-0.89) | **  | 0.889 (0.71-1.11) | NS  | 0.694 (0.37-1.31) | NS  | 0.650 (0.50-0.84)  | **  | 1.114 (0.69-1.81) | NS  | 0.748 (0.56-1.01) | NS  |
| 32 |                                         | Belgium     | 378   |                   |     |                   |     |                   |     |                   |     |                   |     |                   |     |                    |     |                   |     |                   |     |
| 33 |                                         |             |       | 2.112 (1.33-3.36) | **  | 2.018 (1.47-2.77) | *** | 2.751 (2.07-3.66) | *** | 0.924 (0.68-1.25) | NS  | 0.773 (0.58-1.03) | NS  | 0.853 (0.39-1.86) | NS  | 0.439- (0.30-0.64) | *** | 1.372 (0.76-2.48) | NS  | 1.024 (0.72-1.47) | NS  |
| 34 |                                         | Brazil      | 213   |                   |     |                   |     |                   |     |                   |     |                   |     |                   |     |                    |     |                   |     |                   |     |
| 35 |                                         |             |       | 2.885 (1.93-4.32) | *** | 0.879 (0.67-1.15) | NS  | 0.679 (0.49-0.93) | *   | 1.095 (0.83-1.45) | NS  | 0.870 (0.66-1.15) | NS  | 1.390 (0.75-2.57) | NS  | 0.636 (0.46-0.88)  | **  | 1.864 (1.13-3.08) | *   | 0.784 (0.54-1.14) | NS  |
| 36 |                                         | Portugal    | 237   |                   |     |                   |     |                   |     |                   |     |                   |     |                   |     |                    |     |                   |     |                   |     |
| 37 |                                         |             |       | 1.785 (1.18-2.70) | **  | 1.353 (1.06-1.73) | *   | 0.950 (0.73-1.24) | NS  | 1.178 (0.92-1.51) | NS  | 1.279 (0.99-1.65) | NS  | 0.428 (0.17-1.06) | NS  | 1.396 (1.09-1.79)  | **  | 1.548 (0.96-2.50) | NS  | 1.314 (0.98-1.77) | NS  |
| 38 |                                         | Sweden      | 312   |                   |     |                   |     |                   |     |                   |     |                   |     |                   |     |                    |     |                   |     |                   |     |
| 39 |                                         |             |       | 1.563 (0.97-2.52) | NS  | 0.810 (0.62-1.06) | NS  | 0.818 (0.60-1.11) | NS  | 0.700 (0.52-0.95) | *   | 0.674 (0.51-0.89) | **  | 1.052 (0.56-1.99) | NS  | 0.816 (0.60-1.11)  | NS  | 1.299 (0.75-2.26) | NS  | 0.891 (0.63-1.26) | NS  |
| 40 |                                         | Ireland     | 230   |                   |     |                   |     |                   |     |                   |     |                   |     |                   |     |                    |     |                   |     |                   |     |
| 41 |                                         |             |       |                   |     |                   |     |                   |     |                   |     |                   |     |                   |     |                    |     |                   |     |                   |     |
| 42 | <b>White wine</b>                       |             |       |                   |     |                   |     |                   |     |                   |     |                   |     |                   |     |                    |     |                   |     |                   |     |
| 43 |                                         |             |       |                   |     |                   |     |                   |     |                   |     |                   |     |                   |     |                    |     |                   |     |                   |     |
| 44 |                                         |             |       | 0.944 (0.88-1.02) | NS  | 0.891 (0.84-0.95) | *** | 0.898 (0.85-0.95) | *** | 0.967 (0.91-1.03) | NS  | 0.748 (0.70-0.80) | *** | 1.263 (1.07-1.49) | **  | 0.970 (0.90-1.05)  | NS  | 1.132 (1.02-1.26) | *   | 0.791 (0.72-0.87) | *** |
| 45 | <b>Age (years)<sup>€</sup></b>          | 25-29       | 8744  |                   |     |                   |     |                   |     |                   |     |                   |     |                   |     |                    |     |                   |     |                   |     |
| 46 |                                         |             |       | 0.918 (0.93-1.01) | NS  | 0.751 (0.69-0.82) | *** | 0.833 (0.77-0.90) | *** | 0.842 (0.78-0.91) | *** | 0.652 (0.60-0.72) | *** | 1.550 (1.28-1.87) | *** | 0.859 (0.78-0.95)  | **  | 1.128 (0.99-1.29) | NS  | 0.710 (0.63-0.80) | *** |
| 47 |                                         | 30-34       | 4759  |                   |     |                   |     |                   |     |                   |     |                   |     |                   |     |                    |     |                   |     |                   |     |
| 48 |                                         |             |       | 0.946 (0.73-1.22) | NS  | 0.925 (0.75-1.15) | NS  | 0.932 (0.77-1.14) | NS  | 0.865 (0.71-1.06) | NS  | 0.925 (0.74-1.16) | NS  | 0.764 (0.46-1.27) | NS  | 0.917 (0.72-1.17)  | NS  | 0.765 (0.56-1.05) | NS  | 0.765 (0.58-1.01) | NS  |
| 49 | <b>Attended high school<sup>†</sup></b> | Yes         | 29365 |                   |     |                   |     |                   |     |                   |     |                   |     |                   |     |                    |     |                   |     |                   |     |
| 50 |                                         |             |       | 1.156 (1.02-1.32) | *   | 0.942 (0.86-1.03) | NS  | 0.948 (0.86-1.05) | NS  | 0.628 (0.57-0.69) | *** | 0.711 (0.64-0.79) | *** | 0.320 (0.24-0.42) | *** | 0.219 (0.19-0.25)  | *** | 0.671 (0.55-0.82) | *** | 0.656 (0.58-0.75) | *** |
| 51 | <b>Country<sup>†</sup></b>              | Germany     | 10294 |                   |     |                   |     |                   |     |                   |     |                   |     |                   |     |                    |     |                   |     |                   |     |
| 52 |                                         |             |       | 1.780 (1.52-2.09) | *** | 0.487 (0.43-0.56) | *** | 0.749 (0.65-0.87) | *** | 0.601 (0.53-0.69) | *** | 0.700 (0.60-0.82) | *** | 2.883 (2.23-3.74) | *** | 0.391 (0.33-0.46)  | *** | 2.716 (2.20-3.36) | *** | 0.400 (0.32-0.50) | *** |
| 53 |                                         | Switzerland | 2230  |                   |     |                   |     |                   |     |                   |     |                   |     |                   |     |                    |     |                   |     |                   |     |
| 54 |                                         |             |       | 1.047 (0.88-1.25) | NS  | 1.452 (1.28-1.65) | *** | 1.420 (1.24-1.63) | *** | 0.953 (0.84-1.09) | NS  | 1.093 (0.94-1.27) | NS  | 0.538 (0.36-0.80) | **  | 0.695 (0.60-0.81)  | *** | 1.111 (0.86-1.44) | NS  | 0.662 (0.55-0.80) | *** |
| 55 |                                         | Netherlands | 1715  |                   |     |                   |     |                   |     |                   |     |                   |     |                   |     |                    |     |                   |     |                   |     |
| 56 |                                         |             |       | 0.893 (0.74-1.08) | NS  | 1.813 (1.60-2.06) | *** | 1.264 (1.10-1.46) | **  | 0.793 (0.69-0.91) | **  | 1.734 (1.51-1.20) | *** | 0.448 (0.29-0.69) | *** | 0.585 (0.50-0.68)  | *** | 1.231 (0.96-1.59) | NS  | 1.099 (0.92-1.31) | NS  |
| 57 |                                         | US          | 1698  |                   |     |                   |     |                   |     |                   |     |                   |     |                   |     |                    |     |                   |     |                   |     |
| 58 |                                         |             |       | 1.753 (0.47-2.09) | *** | 1.078 (0.94-1.24) | NS  | 1.148 (0.98-1.34) | NS  | 1.376 (1.20-1.58) | *** | 0.899 (0.76-1.07) | NS  | 1.323 (0.96-1.83) | NS  | 1.130 (0.97-1.31)  | NS  | 1.765 (1.38-2.26) | *** | 0.768 (0.62-0.95) | *   |
| 59 |                                         | New Zealand | 1360  |                   |     |                   |     |                   |     |                   |     |                   |     |                   |     |                    |     |                   |     |                   |     |
| 60 |                                         |             |       | 1.427 (1.19-1.71) | *** | 0.984 (0.86-1.13) | NS  | 0.889 (0.76-1.04) | NS  | 0.793 (0.69-0.91) | **  | 1.260 (1.08-1.47) | **  | 1.184 (0.86-1.64) | NS  | 1.159 (1.00-1.34)  | *   | 2.811 (2.25-3.51) | *** | 0.762 (0.62-0.93) | **  |
|    |                                         | France      | 1478  |                   |     |                   |     |                   |     |                   |     |                   |     |                   |     |                    |     |                   |     |                   |     |
|    |                                         |             |       | 1.326 (1.10-1.52) | **  | 1.080 (0.94-1.24) | NS  | 0.877 (0.75-1.00) | NS  | 1.015 (0.88-1.14) | NS  | 0.982 (0.83-1.13) | NS  | 1.136 (0.82-1.52) | NS  | 1.170 (1.01-1.34)  | *   | 1.534 (1.19-2.00) | **  | 0.850 (0.70-1.00) | NS  |
|    |                                         | Australia   | 1360  |                   |     |                   |     |                   |     |                   |     |                   |     |                   |     |                    |     |                   |     |                   |     |



|   |          |     |                       |                       |                       |                      |                       |                       |                       |                       |                       |
|---|----------|-----|-----------------------|-----------------------|-----------------------|----------------------|-----------------------|-----------------------|-----------------------|-----------------------|-----------------------|
| 1 | Canada   | 468 | 1.825 (1.46-2.28) *** | 1.476 (1.21-1.81) *** | 1.644 (1.27-2.13) *** | 1.362 (1.12-1.67) ** | 1.232 (1.01-1.50) *   | 0.981 (0.71-1.36) NS  | 1.264 (1.01-1.58) *   | 1.646 (1.22-2.21) **  | 1.511 (1.11-2.05) **  |
| 2 |          |     | 2.337 (1.73-3.16) *** | 1.518 (1.34-2.03) **  | 1.499 (1.03-2.17) *   | 1.408 (1.06-1.88) *  | 0.764 (0.57-1.02) NS  | 0.912 (0.58-1.45) NS  | 0.794 (0.56-1.13) NS  | 2.355 (1.63-3.42) *** | 1.571 (1.04-2.38) *   |
| 3 | Mexico   | 210 | 1.964 (1.55-2.49) *** | 1.059 (0.85-1.32) NS  | 2.297 (1.77-2.98) *** | 0.963 (0.77-1.20) NS | 0.513 (0.41-0.65) *** | 0.733 (0.50-1.07) NS  | 1.488 (1.17-1.89) **  | 1.053 (0.73-1.52) NS  | 1.501 (1.09-2.08) *   |
| 4 | Belgium  | 378 | 2.153 (1.58-2.93) *** | 1.653 (1.24-2.20) **  | 2.623 (1.89-3.65) *** | 1.275 (0.96-1.70) NS | 1.040 (0.79-1.38) NS  | 0.992 (0.62-1.58) NS  | 0.960 (0.69-1.34) NS  | 2.089 (1.42-3.08) *** | 2.294 (1.57-3.35) *** |
| 5 | Brazil   | 213 | 2.359 (1.77-3.15) *** | 0.766 (0.58-1.01) NS  | 1.467 (1.02-2.11) *   | 0.821 (0.62-1.08) NS | 0.311 (0.23-0.43) *** | 0.391 (0.20-0.75) **  | 0.479 (0.32-0.71) *** | 1.573 (1.05-2.36) *   | 0.832 (0.50-1.39) NS  |
| 6 | Portugal | 237 | 2.462 (1.91-3.17) *** | 1.796 (1.41-2.30) *** | 2.027 (1.52-2.70) *** | 1.471 (1.16-1.87) ** | 1.093 (0.86-1.39) NS  | 0.386 (0.23-0.66) *** | 0.675 (0.49-0.93) *   | 2.556 (1.87-3.49) *** | 1.841 (1.31-2.58) *** |
| 7 | Sweden   | 312 | 1.100 (0.79-1.53) NS  | 1.239 (0.94-1.63) NS  | 1.179 (0.81-1.71) NS  | 1.108 (0.84-1.46) NS | 1.046 (0.80-1.37) NS  | 0.542 (0.33-0.90) *   | 0.853 (0.61-1.19) NS  | 0.821 (0.50-1.34) NS  | 1.031 (0.66-1.61) NS  |
| 8 | Ireland  | 230 |                       |                       |                       |                      |                       |                       |                       |                       |                       |

AOR, adjusted odds ratio; CI, confidence interval; NS, not significant.

\*p<0.05, \*\*p<0.01, \*\*\*p<0.001.

<sup>¶</sup>Country variable was included in the logistic regression model for Table 4 and has been included in separate supplementary table due to space restrictions.

<sup>€</sup>Reference category 18-24 years

<sup>¥</sup>Reference category not attended high school

<sup>†</sup>Reference category United Kingdom

peer review only

Supplementary Table E: Logistic regression model<sup>¶</sup> for age, educational attainment and country of residence and relationships with emotions associated with drinking any type of alcohol<sup>€</sup> in different settings<sup>†</sup>

## a: Positive emotions

|                             | n                           | Mostly drank a drink which made you feel energised |                    |                         |                   | Mostly drank mostly a drink which made you feel relaxed |                   |                         |                   | Mostly drank a drink which made you feel sexy |                   |                         |                   | Mostly drank a drink which made you feel confident |                   |                         |                   |     |
|-----------------------------|-----------------------------|----------------------------------------------------|--------------------|-------------------------|-------------------|---------------------------------------------------------|-------------------|-------------------------|-------------------|-----------------------------------------------|-------------------|-------------------------|-------------------|----------------------------------------------------|-------------------|-------------------------|-------------------|-----|
|                             |                             | At home<br>AOR (95%CI)                             | p                  | When out<br>AOR (95%CI) | p                 | At home<br>AOR (95%CI)                                  | p                 | When out<br>AOR (95%CI) | p                 | At home<br>AOR (95%CI)                        | p                 | When out<br>AOR (95%CI) | p                 | At home<br>AOR (95%CI)                             | p                 | When out<br>AOR (95%CI) | p                 |     |
| <b>Age (years)</b>          | 18-24 <sup>‡</sup>          | 16333                                              |                    |                         |                   |                                                         |                   |                         |                   |                                               |                   |                         |                   |                                                    |                   |                         |                   |     |
|                             | 25-29                       | 8744                                               | 0.825 (0.78-0.88)  | ***                     | 0.704 (0.67-0.74) | ***                                                     | 0.966 (0.91-1.02) | NS                      | 1.087 (1.02-1.15) | **                                            | 0.859 (0.81-0.91) | ***                     | 0.759 (0.72-0.80) | ***                                                | 0.832 (0.79-0.88) | ***                     | 0.756 (0.72-0.80) | *** |
|                             | 30-34                       | 4759                                               | 0.817 (0.76-0.88)  | ***                     | 0.563 (0.52-0.60) | ***                                                     | 0.956 (0.89-1.02) | NS                      | 1.097 (1.03-1.17) | **                                            | 0.775 (0.72-0.84) | ***                     | 0.618 (0.57-0.67) | ***                                                | 0.680 (0.64-0.73) | ***                     | 0.555 (0.52-0.59) | *** |
| <b>Attended high school</b> | No <sup>‡</sup>             | 471                                                |                    |                         |                   |                                                         |                   |                         |                   |                                               |                   |                         |                   |                                                    |                   |                         |                   |     |
|                             | Yes                         | 29365                                              | 0.826 (0.68-1.00)  | NS                      | 0.818 (0.68-0.99) | *                                                       | 1.214 (1.00-1.47) | *                       | 1.176 (0.97-1.42) | NS                                            | 0.818 (0.67-1.00) | *                       | 0.918 (0.76-1.11) | NS                                                 | 0.864 (0.71-1.05) | NS                      | 0.782 (0.64-0.96) | *   |
| <b>Country</b>              | United Kingdom <sup>‡</sup> | 2604                                               |                    |                         |                   |                                                         |                   |                         |                   |                                               |                   |                         |                   |                                                    |                   |                         |                   |     |
|                             | Germany                     | 10294                                              | 1.091 (1.03-1.15)  | **                      | 0.467 (0.43-0.51) | ***                                                     | 0.962 (0.88-1.05) | NS                      | 1.338 (1.27-1.41) | ***                                           | 0.952 (0.87-1.05) | NS                      | 0.888 (0.81-0.97) | *                                                  | 0.650 (0.59-0.71) | ***                     | 0.526 (0.48-0.58) | *** |
|                             | Switzerland                 | 2230                                               | 1.087 (0.95-1.24)  | NS                      | 0.787 (0.70-0.89) | ***                                                     | 0.821 (0.73-0.92) | **                      | 1.130 (1.01-1.27) | *                                             | 0.819 (0.72-0.93) | **                      | 1.025 (0.91-1.16) | NS                                                 | 0.570 (0.51-0.64) | ***                     | 0.615 (0.54-0.70) | *** |
|                             | Netherlands                 | 1715                                               | 1.312 (1.15-1.50)  | ***                     | 0.595 (0.53-0.68) | ***                                                     | 0.834 (0.73-0.95) | **                      | 1.362 (1.20-1.54) | ***                                           | 1.458 (0.28-1.66) | ***                     | 0.855 (0.75-0.97) | *                                                  | 0.925 (0.82-1.05) | NS                      | 0.658 (0.58-0.75) | *** |
|                             | US                          | 1698                                               | 1.553 (1.36-1.78)  | ***                     | 0.991 (0.87-1.13) | NS                                                      | 1.328 (1.16-1.52) | ***                     | 1.707 (1.51-1.93) | ***                                           | 1.343 (1.18-1.53) | ***                     | 1.421 (1.25-1.61) | ***                                                | 1.111 (0.98-1.26) | NS                      | 1.042 (0.91-1.20) | NS  |
|                             | New Zealand                 | 1360                                               | 1.321 (0.14-1.53)  | ***                     | 0.695 (0.61-0.80) | ***                                                     | 1.180 (1.03-1.36) | *                       | 2.088 (1.83-2.39) | ***                                           | 1.074 (0.93-1.24) | NS                      | 1.004 (0.87-1.15) | NS                                                 | 1.371 (1.20-1.57) | ***                     | 1.008 (0.87-1.17) | NS  |
|                             | France                      | 1478                                               | 1.560 (0.136-1.80) | NS                      | 1.040 (0.91-1.19) | NS                                                      | 1.077 (0.94-1.23) | NS                      | 1.892 (1.66-2.15) | ***                                           | 0.798 (0.69-0.92) | **                      | 0.944 (0.83-1.08) | NS                                                 | 0.743 (0.65-0.85) | ***                     | 0.631 (0.55-0.72) | *** |
|                             | Australia                   | 1360                                               | 1.106 (0.95-1.29)  | ***                     | 0.628 (0.55-0.72) | ***                                                     | 1.486 (1.28-1.72) | ***                     | 2.388 (2.09-2.73) | ***                                           | 0.850 (0.73-0.98) | *                       | 0.787 (0.68-0.91) | **                                                 | 1.113 (0.97-1.27) | NS                      | 0.934 (0.81-1.08) | NS  |
|                             | Hungary                     | 1055                                               | 1.447 (1.23-1.70)  | NS                      | 0.637 (0.55-0.74) | ***                                                     | 0.521 (0.45-0.60) | ***                     | 1.019 (0.88-1.18) | NS                                            | 1.058 (0.90-1.24) | NS                      | 0.822 (0.70-0.96) | *                                                  | 0.646 (0.56-0.75) | ***                     | 0.469 (0.40-0.55) | *** |
|                             | Italy                       | 1268                                               | 1.159 (0.99-1.35)  | ***                     | 0.696 (0.61-0.80) | ***                                                     | 0.677 (0.59-0.78) | ***                     | 1.148 (1.00-1.32) | *                                             | 0.813 (0.70-0.95) | **                      | 0.823 (0.71-0.95) | **                                                 | 0.607 (0.53-0.70) | ***                     | 0.420 (0.37-0.49) | *** |
|                             | Spain                       | 692                                                | 1.437 (1.19-1.73)  | ***                     | 1.038 (0.87-1.23) | NS                                                      | 0.736 (0.62-0.87) | ***                     | 0.969 (0.81-1.15) | NS                                            | 0.802 (0.66-0.97) | *                       | 0.961 (0.80-1.15) | NS                                                 | 0.896 (0.76-1.06) | ***                     | 0.873 (0.73-1.05) | NS  |
|                             | Colombia                    | 372                                                | 2.063 (1.64-2.59)  | NS                      | 1.547 (1.23-1.95) | ***                                                     | 0.913 (0.73-1.15) | NS                      | 1.079 (0.86-1.35) | NS                                            | 1.338 (1.06-1.68) | *                       | 1.641 (1.31-2.05) | ***                                                | 0.800 (0.64-1.00) | *                       | 0.934 (0.74-1.19) | NS  |
|                             | Austria                     | 880                                                | 0.966 (0.81-1.16)  | ***                     | 0.377 (0.32-0.45) | ***                                                     | 1.083 (0.92-1.28) | NS                      | 1.813 (1.55-2.12) | ***                                           | 0.957 (0.81-1.13) | NS                      | 0.791 (0.67-0.93) | **                                                 | 0.701 (0.60-0.82) | ***                     | 0.463 (0.39-0.54) | *** |
|                             | Norway                      | 782                                                | 1.849 (1.56-2.19)  | ***                     | 0.640 (0.54-0.76) | ***                                                     | 1.427 (1.19-1.71) | ***                     | 2.578 (2.19-3.04) | ***                                           | 1.211 (1.02-1.44) | *                       | 0.758 (0.64-0.90) | **                                                 | 1.221 (1.03-1.44) | *                       | 0.763 (0.64-0.91) | **  |
|                             | Canada                      | 468                                                | 1.509 (1.22-1.87)  | ***                     | 0.950 (0.78-1.16) | NS                                                      | 1.337 (1.08-1.66) | **                      | 1.689 (1.39-2.06) | ***                                           | 1.414 (1.15-1.74) | **                      | 0.972 (0.79-1.20) | NS                                                 | 1.334 (1.09-1.64) | **                      | 0.916 (0.74-1.14) | NS  |
|                             | Mexico                      | 210                                                | 2.016 (1.50-2.70)  | NS                      | 0.996 (0.75-1.33) | NS                                                      | 1.064 (0.79-1.44) | NS                      | 1.736 (1.31-2.30) | ***                                           | 1.130 (0.84-1.53) | NS                      | 1.149 (0.86-1.54) | NS                                                 | 1.098 (0.82-1.47) | NS                      | 1.001 (0.73-1.37) | NS  |
|                             | Belgium                     | 378                                                | 1.021 (0.80-1.31)  | ***                     | 0.588 (0.47-0.73) | ***                                                     | 1.198 (0.95-1.52) | NS                      | 1.741 (1.40-2.16) | ***                                           | 1.196 (0.95-1.50) | NS                      | 0.924 (0.74-1.16) | NS                                                 | 0.655 (0.53-0.82) | ***                     | 0.540 (0.43-0.68) | *** |
|                             | Brazil                      | 213                                                | 1.734 (1.29-2.34)  | *                       | 0.719 (0.54-0.96) | *                                                       | 1.407 (1.03-1.93) | *                       | 2.034 (1.53-2.70) | ***                                           | 1.725 (1.29-2.30) | ***                     | 1.187 (0.89-1.59) | NS                                                 | 0.980 (0.74-1.30) | NS                      | 0.797 (0.59-1.07) | NS  |
|                             | Portugal                    | 237                                                | 1.430 (1.07-1.92)  | ***                     | 0.711 (0.54-0.93) | *                                                       | 0.836 (0.64-1.10) | NS                      | 1.241 (0.95-1.63) | NS                                            | 0.802 (0.59-1.09) | NS                      | 0.819 (0.61-1.09) | NS                                                 | 0.662 (0.51-0.87) | **                      | 0.508 (0.39-0.67) | *** |
|                             | Sweden                      | 312                                                | 1.788 (1.39-2.30)  | NS                      | 0.638 (0.50-0.81) | ***                                                     | 1.275 (0.99-1.65) | NS                      | 1.323 (1.01-1.74) | ***                                           | 1.010 (0.78-1.31) | NS                      | 0.755 (0.58-0.98) | *                                                  | 1.259 (0.99-1.61) | NS                      | 0.690 (0.54-0.89) | **  |
|                             | Ireland                     | 230                                                | 0.965 (0.75-1.07)  | NS                      | 0.543 (0.41-0.72) | ***                                                     | 0.894 (0.67-1.18) | NS                      | 1.332 (1.22-1.46) | *                                             | 0.879 (0.65-1.18) | NS                      | 0.690 (0.52-0.93) | *                                                  | 0.959 (0.73-1.26) | NS                      | 0.650 (0.49-0.87) | **  |



AOR, adjusted odds ratio; CI, confidence interval; NS, not significant.

\*p<0.05, \*\*p<0.01, \*\*\*p<0.001.

<sup>†</sup>Country variable was included in the logistic regression model for Table 5 and has been included in separate supplementary table due to space restrictions.

<sup>‡</sup>Emotions from drinking respondents reported regardless of the type of alcohol they associate it with. Includes emotions associated with spirits, white wine, red wine and beer.

<sup>††</sup>Respondents reported which drink type they mostly drank when at home and when out.

<sup>‡‡</sup>Reference category

**b: Negative emotions**

|                             |                              |       | Mostly drank a drink which makes you feel tired |     |                   |     | Mostly drank a drink which makes you feel aggressive |     |                   |     | Mostly drank a drink which makes you feel ill |     |                   |     | Mostly drank a drink which makes you feel tearful |     |                   |     |
|-----------------------------|------------------------------|-------|-------------------------------------------------|-----|-------------------|-----|------------------------------------------------------|-----|-------------------|-----|-----------------------------------------------|-----|-------------------|-----|---------------------------------------------------|-----|-------------------|-----|
|                             |                              |       | When at home                                    |     | When out          |     | When at home                                         |     | When out          |     | When at home                                  |     | When out          |     | When at home                                      |     | When out          |     |
| n                           |                              |       | AOR (95%CI)                                     | p   | AOR (95%CI)       | p   | AOR (95%CI)                                          | p   | AOR (95%CI)       | p   | AOR (95%CI)                                   | p   | AOR (95%CI)       | p   | AOR (95%CI)                                       | p   | AOR (95%CI)       | p   |
| <b>Age (years)</b>          | 18-24 <sup>‡‡</sup>          | 16333 | 0.986 (0.94-1.04)                               | NS  | 1.147 (1.08-1.22) | *** | 0.884 (0.79-0.99)                                    | *   | 0.774 (0.71-0.84) | *** | 0.995 (0.92-1.08)                             | NS  | 0.851 (0.80-0.91) | *** | 0.897 (0.83-0.97)                                 | **  | 0.893 (0.83-0.96) | **  |
|                             | 25-29                        | 8744  | 0.863 (0.81-0.92)                               | *** | 1.115 (1.04-1.20) | *** | 0.904 (0.78-1.04)                                    | *   | 0.712 (0.64-0.79) | *** | 0.961 (0.87-1.07)                             | NS  | 0.713 (0.65-0.78) | *** | 0.806 (0.73-0.89)                                 | *** | 0.746 (0.67-0.83) | *** |
|                             | 30-34                        | 4759  |                                                 |     |                   |     |                                                      |     |                   |     |                                               |     |                   |     |                                                   |     |                   |     |
| <b>Attended high school</b> | No <sup>‡‡</sup>             | 471   | 1.008 (0.84-1.22)                               | *   | 0.940 (0.77-1.15) | NS  | 0.799 (0.58-1.09)                                    | NS  | 0.750 (0.59-0.96) | *   | 0.762 (0.60-0.97)                             | *   | 0.717 (0.58-0.88) | *** | 0.754 (0.60-0.95)                                 | *   | 0.735 (0.58-0.93) | **  |
|                             | Yes                          | 29365 |                                                 |     |                   |     |                                                      |     |                   |     |                                               |     |                   |     |                                                   |     |                   |     |
| <b>Country</b>              | United Kingdom <sup>‡‡</sup> | 2604  | 0.763 (0.70-0.83)                               | *** | 1.400 (1.26-1.55) | *** | 0.447 (0.38-0.53)                                    | *** | 0.559 (0.50-0.63) | *** | 0.436 (0.38-0.50)                             | *** | 0.476 (0.43-0.53) | *** | 0.851 (0.49-0.56)                                 | *** | 0.685 (0.61-0.77) | *** |
|                             | Germany                      | 10294 | 0.797 (0.71-0.89)                               | *** | 0.606 (0.52-0.70) | *** | 0.536 (0.42-0.68)                                    | *** | 0.641 (0.54-0.76) | *** | 0.395 (0.33-0.48)                             | *** | 0.459 (0.40-0.53) | *** | 0.636 (0.53-0.76)                                 | *** | 0.546 (0.46-0.65) | *** |
|                             | Switzerland                  | 2230  | 0.806 (0.71-0.91)                               | **  | 1.387 (1.21-1.60) | *** | 0.636 (0.51-0.80)                                    | *** | 0.503 (0.42-0.60) | *** | 1.062 (0.91-1.25)                             | NS  | 0.830 (0.72-0.95) | **  | 0.761 (0.65-0.90)                                 | **  | 0.612 (0.52-0.72) | *** |
|                             | Netherlands                  | 1715  | 0.889 (0.79-1.01)                               | NS  | 1.303 (1.13-1.50) | *** | 1.389 (1.15-1.68)                                    | **  | 1.657 (1.43-1.92) | *** | 1.326 (1.13-1.55)                             | *** | 1.498 (1.31-1.71) | *** | 1.307 (1.12-1.53)                                 | **  | 1.264 (1.09-1.47) | **  |
|                             | US                           | 1698  | 0.843 (0.74-0.96)                               | *   | 1.539 (1.33-1.78) | *** | 0.746 (0.89-0.95)                                    | *   | 0.686 (0.57-0.83) | *** | 1.113 (0.94-1.32)                             | NS  | 0.834 (0.72-0.97) | *   | 0.606 (0.50-0.74)                                 | *** | 0.748 (0.62-0.90) | **  |
|                             | New Zealand                  | 1360  | 0.494 (0.43-0.57)                               | *** | 0.938 (0.80-1.09) | NS  | 0.460 (0.35-0.60)                                    | *** | 1.003 (0.85-1.18) | NS  | 1.085 (0.92-1.28)                             | NS  | 1.282 (1.12-1.47) | *** | 0.878 (0.74-1.05)                                 | NS  | 1.016 (0.87-1.19) | NS  |
|                             | France                       | 1478  | 0.969 (0.85-1.11)                               | NS  | 1.633 (1.41-1.89) | *** | 0.747 (0.59-0.95)                                    | *   | 0.645 (0.53-0.78) | *** | 1.000 (0.84-1.19)                             | NS  | 0.734 (0.63-0.86) | *** | 0.941 (0.79-1.12)                                 | NS  | 0.829 (0.70-0.99) | *   |
|                             | Australia                    | 1360  | 0.548 (0.47-0.64)                               | *** | 1.289 (1.11-1.53) | **  | 0.566 (0.42-0.76)                                    | *** | 0.614 (0.50-0.76) | *** | 0.684 (0.55-0.85)                             | *** | 0.639 (0.53-0.76) | *** | 0.747 (0.60-0.92)                                 | **  | 0.573 (0.46-0.71) | *** |
|                             | Hungary                      | 1055  | 0.399 (0.35-0.46)                               | *** | 0.719 (0.61-0.85) | *** | 0.552 (0.42-0.73)                                    | *** | 0.936 (0.78-1.12) | NS  | 0.422 (0.33-0.53)                             | *** | 0.583 (0.49-0.69) | *** | 0.501 (0.40-0.63)                                 | *** | 0.440 (0.35-0.55) | *** |
|                             | Italy                        | 1268  | 0.717 (0.60-0.85)                               | *** | 1.058 (0.87-1.29) | NS  | 0.706 (0.51-0.97)                                    | *   | 1.235 (1.00-1.53) | NS  | 0.393 (0.29-0.53)                             | *** | 0.715 (0.58-0.88) | **  | 0.847 (0.67-1.08)                                 | NS  | 1.024 (0.83-1.27) | NS  |
|                             | Spain                        | 692   | 0.526 (0.42-0.66)                               | *** | 0.814 (0.62-1.06) | NS  | 0.866 (0.60-1.26)                                    | NS  | 1.367 (1.05-1.78) | *   | 0.824 (0.61-1.12)                             | NS  | 1.067 (0.84-1.36) | NS  | 0.885 (0.65-1.20)                                 | NS  | 1.599 (1.24-2.06) | *** |
|                             | Colombia                     | 372   | 0.842 (0.72-0.98)                               | *   | 1.892 (1.60-2.23) | *** | 0.282 (0.18-0.43)                                    | *** | 0.327 (0.25-0.44) | *** | 0.380 (0.29-0.53)                             | *** | 0.307 (0.24-0.39) | *** | 0.848 (0.68-1.06)                                 | NS  | 0.571 (0.45-0.72) | *** |
|                             | Austria                      | 880   | 0.852 (0.73-1.00)                               | NS  | 2.103 (1.77-2.50) | *** | 0.475 (0.34-0.67)                                    | *** | 0.352 (0.27-0.47) | *** | 0.831 (0.67-1.04)                             | NS  | 0.556 (0.45-0.68) | *** | 1.117 (0.91-1.38)                                 | NS  | 0.868 (0.70-1.07) | NS  |
|                             | Norway                       | 782   | 1.038 (0.85-1.26)                               | NS  | 1.833 (1.48-2.27) | *** | 1.232 (0.90-1.69)                                    | NS  | 1.145 (0.89-1.47) | NS  | 1.199 (0.93-1.54)                             | NS  | 1.132 (0.91-1.41) | NS  | 1.230 (0.96-1.58)                                 | NS  | 1.090 (0.85-1.39) | NS  |
|                             | Canada                       | 468   | 0.648 (0.46-0.87)                               | **  | 1.103 (0.80-1.53) | NS  | 1.236 (0.80-1.90)                                    | NS  | 1.374 (0.98-1.93) | NS  | 0.908 (0.62-1.34)                             | NS  | 0.851 (0.61-1.18) | NS  | 1.091 (0.76-1.57)                                 | NS  | 1.172 (0.83-1.65) | NS  |
|                             | Mexico                       | 210   | 0.730 (0.59-0.91)                               | **  | 1.107 (0.86-1.42) | NS  | 0.527 (0.34-0.82)                                    | **  | 0.535 (0.39-0.74) | *** | 1.157 (0.88-1.52)                             | NS  | 0.981 (0.77-1.25) | NS  | 0.902 (0.67-1.21)                                 | NS  | 0.805 (0.61-1.07) | NS  |
|                             | Belgium                      | 378   | 0.736 (0.55-0.98)                               | *   | 1.591 (1.18-2.14) | **  | 1.141 (0.72-1.78)                                    | NS  | 1.048 (0.73-1.51) | NS  | 0.719 (0.47-1.09)                             | NS  | 0.954 (0.69-1.31) | NS  | 1.149 (0.80-1.64)                                 | NS  | 1.014 (0.71-1.47) | NS  |
|                             | Brazil                       | 213   |                                                 |     |                   |     |                                                      |     |                   |     |                                               |     |                   |     |                                                   |     |                   |     |

|   |          |     |              |                  |              |           |              |           |              |          |              |  |              |  |              |  |              |
|---|----------|-----|--------------|------------------|--------------|-----------|--------------|-----------|--------------|----------|--------------|--|--------------|--|--------------|--|--------------|
| 1 |          |     | 0.98)        |                  | 2.16)        |           | 1.81)        |           | 1.51)        |          | 1.09)        |  | 1.31)        |  | 1.65)        |  | 1.45)        |
| 2 |          |     | 0.652 (0.50- |                  |              |           | 0.965 (0.60- |           | 0.573 (0.37- |          | 0.538 (0.35- |  | 0.388 (0.26- |  | 0.820 (0.56- |  | 0.513 (0.34- |
| 3 | Portugal | 237 | 0.86) **     | 0.747 (.53-1.05) | NS           | 1.55) NS  | 0.88) *      | 0.84) **  | 0.58) ***    | 1.20) NS | 0.78) **     |  |              |  |              |  |              |
| 4 |          |     | 1.131 (0.89- |                  | 2.656 (2.09- |           | 0.423 (0.25- |           | 0.344 (0.22- |          | 0.895 (0.65- |  | 0.566 (0.42- |  | 1.077 (0.78- |  | 0.905 (0.66- |
| 5 | Sweden   | 312 | 1.43) NS     | 3.38) ***        | 0.72) **     | 0.53) *** | 1.24) NS     | 0.77) *** | 1.49) NS     | 1.24) NS |              |  |              |  |              |  |              |
| 6 |          |     | 0.881 (0.67- |                  | 1.362 (1.01- |           | 0.776 (0.49- |           | 0.721 (0.50- |          | 0.784 (0.54- |  | 0.684 (0.49- |  | 0.930 (0.65- |  | 0.781 (0.55- |
| 7 | Ireland  | 230 | 1.16) NS     | 1.84) *          | 1.22) NS     | 1.03) NS  | 1.15) NS     | 0.95) *   | 1.33) NS     | 1.11) NS |              |  |              |  |              |  |              |

AOR, adjusted odds ratio; CI, confidence interval; NS, not significant.

\*p<0.05, \*\*p<0.01, \*\*\*p<0.001.

<sup>†</sup>Country variable was included in the logistic regression model for Table 5 and has been included in separate supplementary table due to space restrictions.

<sup>‡</sup>Emotions from drinking respondents reported regardless of the type of alcohol they associate it with. Includes emotions associated with spirits, white wine, red wine and beer.

<sup>§</sup>Respondents reported which drink type they mostly drank when at home and when out.

<sup>¶</sup>Reference category

For peer review only

STROBE 2007 (v4) Statement—Checklist of items that should be included in reports of *cross-sectional studies*

| Section/Topic                | Item # | Recommendation                                                                                                                                                                       | Reported on page # |
|------------------------------|--------|--------------------------------------------------------------------------------------------------------------------------------------------------------------------------------------|--------------------|
| Title and abstract           | 1      | (a) Indicate the study's design with a commonly used term in the title or the abstract                                                                                               | 1                  |
|                              |        | (b) Provide in the abstract an informative and balanced summary of what was done and what was found                                                                                  | 2                  |
| <b>Introduction</b>          |        |                                                                                                                                                                                      |                    |
| Background/rationale         | 2      | Explain the scientific background and rationale for the investigation being reported                                                                                                 | 4                  |
| Objectives                   | 3      | State specific objectives, including any prespecified hypotheses                                                                                                                     | 4                  |
| <b>Methods</b>               |        |                                                                                                                                                                                      |                    |
| Study design                 | 4      | Present key elements of study design early in the paper                                                                                                                              | 5                  |
| Setting                      | 5      | Describe the setting, locations, and relevant dates, including periods of recruitment, exposure, follow-up, and data collection                                                      | 5                  |
| Participants                 | 6      | (a) Give the eligibility criteria, and the sources and methods of selection of participants                                                                                          | 5                  |
| Variables                    | 7      | Clearly define all outcomes, exposures, predictors, potential confounders, and effect modifiers. Give diagnostic criteria, if applicable                                             | 5                  |
| Data sources/<br>measurement | 8*     | For each variable of interest, give sources of data and details of methods of assessment (measurement). Describe comparability of assessment methods if there is more than one group | 5/6                |
| Bias                         | 9      | Describe any efforts to address potential sources of bias                                                                                                                            | 6                  |
| Study size                   | 10     | Explain how the study size was arrived at                                                                                                                                            | 5/6                |
| Quantitative variables       | 11     | Explain how quantitative variables were handled in the analyses. If applicable, describe which groupings were chosen and why                                                         | 6                  |
| Statistical methods          | 12     | (a) Describe all statistical methods, including those used to control for confounding                                                                                                | 6                  |
|                              |        | (b) Describe any methods used to examine subgroups and interactions                                                                                                                  | 6                  |
|                              |        | (c) Explain how missing data were addressed                                                                                                                                          | 5/6                |
|                              |        | (d) If applicable, describe analytical methods taking account of sampling strategy                                                                                                   | NA                 |
|                              |        | (e) Describe any sensitivity analyses                                                                                                                                                | NA                 |
| <b>Results</b>               |        |                                                                                                                                                                                      |                    |



|                          |     |                                                                                                                                                                                                              |                         |
|--------------------------|-----|--------------------------------------------------------------------------------------------------------------------------------------------------------------------------------------------------------------|-------------------------|
| Participants             | 13* | (a) Report numbers of individuals at each stage of study—eg numbers potentially eligible, examined for eligibility, confirmed eligible, included in the study, completing follow-up, and analysed            | 5                       |
|                          |     | (b) Give reasons for non-participation at each stage                                                                                                                                                         | NA                      |
|                          |     | (c) Consider use of a flow diagram                                                                                                                                                                           | NA                      |
| Descriptive data         | 14* | (a) Give characteristics of study participants (eg demographic, clinical, social) and information on exposures and potential confounders                                                                     | 5/Supplementary Table A |
|                          |     | (b) Indicate number of participants with missing data for each variable of interest                                                                                                                          | 5                       |
| Outcome data             | 15* | Report numbers of outcome events or summary measures                                                                                                                                                         | NA                      |
| Main results             | 16  | (a) Give unadjusted estimates and, if applicable, confounder-adjusted estimates and their precision (eg, 95% confidence interval). Make clear which confounders were adjusted for and why they were included | 6-17                    |
|                          |     | (b) Report category boundaries when continuous variables were categorized                                                                                                                                    | 6-17                    |
|                          |     | (c) If relevant, consider translating estimates of relative risk into absolute risk for a meaningful time period                                                                                             | NA                      |
| Other analyses           | 17  | Report other analyses done—eg analyses of subgroups and interactions, and sensitivity analyses                                                                                                               | 6-17                    |
| <b>Discussion</b>        |     |                                                                                                                                                                                                              |                         |
| Key results              | 18  | Summarise key results with reference to study objectives                                                                                                                                                     | 18                      |
| Limitations              | 19  | Discuss limitations of the study, taking into account sources of potential bias or imprecision. Discuss both direction and magnitude of any potential bias                                                   | 19                      |
| Interpretation           | 20  | Give a cautious overall interpretation of results considering objectives, limitations, multiplicity of analyses, results from similar studies, and other relevant evidence                                   | 18/19                   |
| Generalisability         | 21  | Discuss the generalisability (external validity) of the study results                                                                                                                                        | 18/19                   |
| <b>Other information</b> |     |                                                                                                                                                                                                              |                         |
| Funding                  | 22  | Give the source of funding and the role of the funders for the present study and, if applicable, for the original study on which the present article is based                                                | 3                       |

\*Give information separately for cases and controls in case-control studies and, if applicable, for exposed and unexposed groups in cohort and cross-sectional studies.

**Note:** An Explanation and Elaboration article discusses each checklist item and gives methodological background and published examples of transparent reporting. The STROBE checklist is best used in conjunction with this article (freely available on the Web sites of PLoS Medicine at <http://www.plosmedicine.org/>, Annals of Internal Medicine at <http://www.annals.org/>, and Epidemiology at <http://www.epidem.com/>). Information on the STROBE Initiative is available at [www.strobe-statement.org](http://www.strobe-statement.org).
